1           **The bacterial leader peptide peTrpL has a conserved function**  
2                   **in antibiotic-dependent posttranscriptional regulation**  
3                           **of ribosomal genes**

4  
5           Hendrik Melior<sup>1</sup>, Sandra Maaß<sup>2</sup>, Maximilian Stötzel<sup>1</sup>, Siqi Li<sup>1</sup>, Konrad U. Förstner<sup>3</sup>, Rubina Schütz<sup>1</sup>,  
6           Saina Azarderakhsh<sup>1</sup>, Aleksei Shevkoplias<sup>4,5</sup>, Susanne Barth-Weber<sup>1</sup>, Adithi R. Varadarajan<sup>6</sup>, Kathrin  
7           Baumgardt<sup>1</sup>, Zoe Chervontseva<sup>7,8</sup>, John Ziebuhr<sup>9</sup>, Christian H. Ahrens<sup>6</sup>, Dörte Becher<sup>2</sup>, Elena  
8                           Evguenieva-Hackenberg<sup>1\*</sup>

9  
10  
11           <sup>1</sup> Institute of Microbiology and Molecular Biology, University of Giessen, Germany

12           <sup>2</sup> Institute of Microbiology, University of Greifswald, Germany

13           <sup>3</sup> ZB MED - Information Center for Life Sciences, University of Cologne, Germany

14           <sup>4</sup> Laboratory for Marine Benthic Ecology and Hydrobiology, Anichkov Lyceum, St. Petersburg, Russia

15           <sup>5</sup> Faculty of Biology and Biotechnology, Higher School of Economics, Moscow, Russia

16           <sup>6</sup> Agroscope & SIB Swiss Institute of Bioinformatics, Wädenswil, Switzerland

17           <sup>7</sup> Center for Life Sciences, Skolkovo Institute of Technology, Moscow, Russia

18           <sup>8</sup> Kharkevich Institute for Information Transmission Problems RAS, Moscow, Russia

19           <sup>9</sup> Institute of Medical Virology, University of Giessen, Germany

20  
21  
22  
23           \* Corresponding Author / Leader contact

24           Email: Elena.Evguenieva-Hackenberg@mikro.bio.uni-giessen.de

28

29 **Summary**

30 The ribosome-dependent attenuator located upstream of bacterial tryptophan biosynthesis genes  
31 harbors a small ORF *trpL* containing tryptophan codons. When tryptophan is available, efficient *trpL*  
32 translation causes transcription termination and release of the attenuator RNA rnTrpL. In *Sinorhizobium*  
33 *meliloti*, rnTrpL is a *trans*-acting sRNA. Here, we identified an evolutionary conserved function for the  
34 *trpL*-encoded 14-aa leader peptide peTrpL. Upon exposure to tetracycline, the cellular peTrpL levels  
35 were increased and rnTrpL was generated independently of tryptophan availability. Both peTrpL and  
36 rnTrpL were found to be involved in tetracycline-dependent destabilization of *rplUrpmA* mRNA encoding  
37 ribosomal proteins L21 and L27. We provide evidence for redirection of the sRNA rnTrpL from its  
38 antibiotic-independent target *trpDC* to *rplUrpmA* by formation of an antibiotic-dependent  
39 ribonucleoprotein complex (ARNP). ARNPs comprising peTrpL, rnTrpL, *rplUrpmA* and antisense RNA  
40 were also observed for other translation-inhibiting antibiotics, suggesting that bacteria evolved  
41 mechanisms to utilize antibiotics for mRNA destabilization.

42

43

## 44 **Introduction**

45 In bacteria where transcription and translation are coupled, ribosome-dependent transcription  
46 attenuation is a conserved regulatory mechanism that relies on small upstream ORFs (uORFs) encoding  
47 leader peptides. Despite their widespread occurrence, no functions in *trans* are known for the leader  
48 peptides. Here, we assign a function in *trans* to a bacterial leader peptide in the posttranscriptional  
49 downregulation of specific ribosomal genes upon exposure to translation-inhibiting antibiotics. We  
50 provide evidence that this regulation involves a ribonucleoprotein complex, the formation of which is  
51 directly supported by the antibiotics.

52 Ribosome-dependent transcription attenuators are located upstream of many amino acid (aa)  
53 biosynthesis operons in Gram-negative bacteria (Merino et al., 2008; Vitreschak et al., 2004). This  
54 posttranscriptional mechanism has been studied most extensively in *Escherichia coli* where the  
55 tryptophan (Trp) biosynthesis genes *trpEDCBA* are co-transcribed (Yanofski, 1981). The 5' mRNA  
56 leader harbors the uORF *trpL*, which contains two consecutive Trp codons (codons 10 and 11 of the 14-  
57 codon uORF). Under conditions of Trp insufficiency, ribosome pausing at the Trp codons prevents the  
58 formation of a transcriptional terminator downstream of the uORF, thus resulting in co-transcription of  
59 *trpL* with the structural *trp* genes. In contrast, if enough Trp is available, fast translation of the Trp codons  
60 causes transcription termination between *trpL* and *trpE*. However, transcription termination between *trpL*  
61 and *trpE* is also caused by ribosome pausing in the first half of *trpL* (Zurawski et al., 1978).

62 Generally, the released products of ribosome-dependent attenuators, i.e. the small attenuator RNAs  
63 and leader peptides, have been considered nonfunctional. Recently, however, we reported that in the  
64 soil-dwelling, nitrogen-fixing and Gram-negative plant symbiont *S. meliloti*, the attenuator RNA rnTrpL  
65 is a *trans*-acting small RNA (sRNA) (Melior et al., 2019). Like in many other bacteria, the *trp* genes of  
66 *S. meliloti* are organized into several operons, only one of which is regulated by attenuation (Merino et  
67 al., 2008). The *trp* attenuator of *S. meliloti* is located upstream of *trpE(G)* (Fig. 1A; Bae and Crawford,  
68 1990), which is transcribed separately from *trpDC* and *trpFBA* (Jonston et al., 1978). Under conditions  
69 of Trp availability, fast translation of three consecutive Trp codons in *trpL* (codons 9 to 11) results in  
70 transcription termination. The released sRNA rnTrpL (110 nt) base pairs with and destabilizes *trpDC*  
71 mRNA, thereby posttranscriptionally coordinating the expression of the *trpE(G)* and *trpDC* operons  
72 (Melior et al., 2019).

73 Another direct target of rnTrpL (synonym RcsR1) is *sinI* mRNA, which encodes an autoinducer synthase.  
74 Additionally, several other mRNAs were predicted to base pair with rnTrpL, including *rplUrpmA*, which  
75 encodes ribosomal proteins L21 and L27 (Baumgardt et al., 2016). The regulation of multiple mRNAs  
76 by a single bacterial sRNA is relatively common and involves an imperfect complementarity to (most of)  
77 its targets (Storz et al., 2011; Feng et al., 2015). Frequently, these sRNAs additionally employ RNA  
78 chaperones like Hfq and ProQ to ensure efficient target binding (Santiago-Frangos and Woodson, 2018;  
79 Smirnov et al., 2016). However, the *S. meliloti* genome does not encode a ProQ homolog (Galibert et  
80 al., 2001) and rnTrpL has been reported to be an Hfq-independent sRNA (Baumgardt et al., 2016). Thus,

81 a proteinaceous interaction partner of rnTrpL, which may enable its interaction with (specific) target  
82 mRNAs, still remained to be identified.

83 In addition to the well-studied ribosome-dependent attenuators in Gram-negative bacteria, recently such  
84 attenuators were also found to regulate antibiotic resistance operons of Gram-positive bacteria: upon  
85 exposure of *Bacillus* or *Listeria* to translation-inhibiting antibiotics, ribosome stalling at uORFs prevented  
86 transcription termination, thus inducing the expression of downstream resistance genes (Dar et al.,  
87 2016). The widespread occurrence and high synteny conservation of attenuator uORFs in bacteria  
88 raises the question of whether some of these leader peptides may have acquired independent functions  
89 in *trans* during evolution. This hypothesis is supported by the increasing evidence for functional small  
90 proteins encoded by sORFs shorter than 50 codons, which often are missing in current genome  
91 annotations (Storz et al., 2014). For example, in *Drosophila*, small proteins of between 11 and 32 aa in  
92 length regulate cell morphogenesis (Kondo et al., 2007) and, in *Bacillus subtilis*, the basic 29-aa protein  
93 FbpC was proposed to act as an RNA chaperone (Gaballa et al., 2008), whereas, in *E. coli*, the 31-aa  
94 protein MgtS was shown to interact with two different proteins and regulate Mg<sup>2+</sup> homeostasis (Yin et  
95 al., 2018). These few examples illustrate that sORF-encoded proteins have become an important  
96 research field (Andrews and Rothnagel, 2014; Storz et al., 2014; Cabrera-Quio et al., 2016; Omasits et  
97 al., 2017; Weaver et al., 2019).

98 Here, we provide evidence that the *trp* attenuator-encoded leader peptide peTrpL is involved in the  
99 posttranscriptional regulation of the ribosomal genes *rplUrpmA* in *S. meliloti*. Analysis of the predicted  
100 interaction between the attenuator sRNA rnTrpL and *rplUrpmA* uncovered that peTrpL and tetracycline  
101 (Tc) are both required for an rnTrpL-mediated destabilization of *rplUrpmA*. Our results suggest that  
102 peTrpL, together with Tc or other translation-inhibiting antibiotics, redirects rnTrpL from *trpDC* to its  
103 antibiotic-dependent target *rplUrpmA*. Moreover, we found that the function of the leader peptide in  
104 *rplUrpmA* downregulation is conserved in other soil Alphaproteobacteria. In soil where antibiotic  
105 exposure is common, the downregulation of *rplUrpmA* by rnTrpL and peTrpL in a complex with an  
106 antibiotic is probably a part of an adaptation response. We propose that during evolution, the *trp*  
107 attenuator was recruited for the here described, tryptophan-independent function, because it is well  
108 suited to sense translation inhibition.

109

## 110 **Results**

### 111 **Overproduction of the leader peptide peTrpL decreases the *rplUrpmA* mRNA level**

112 The *rplUrpmA* operon encodes the ribosomal proteins L21 and L27 and is one of the previously  
113 predicted but not yet experimentally verified targets of the sRNA rnTrpL (Baumgardt et al., 2016). To  
114 test this prediction and potentially identify a proteinaceous partner, we constitutively overproduced the  
115 sRNA rnTrpL from the tetracycline (Tc) resistance-conferring plasmid pRK-rnTrpL (Fig. S1) in strain *S.*  
116 *meliloti* 2011, which has a wild type *trpLE(G)* background (Fig. 1A), and then analyzed the level of  
117 *rplUrpmA* mRNA. When compared to the empty vector control strain (EVC), the *rplUrpmA* level was  
118 increased in the constitutively overproducing strain, while, as expected, the level of the control mRNA  
119 *trpDC* was decreased and that of *trpE* was not changed (Fig. 1B).

120 To assess whether the increase in the *rplUrpmA* level is a primary effect, we used the gentamycin (Gm)  
121 resistance-conferring plasmid pSRKGm-rnTrpL, which allows for IPTG-inducible transcription of a  
122 rnTrpL variant named lacZ'-rnTrpL (Fig. S1). In a previous study, we could show that the sRNA lacZ'-  
123 rnTrpL is a functional riboregulator that destabilizes *trpDC* mRNA (Melior et al., 2019). However, at 10  
124 min and 240 min (4 h) after IPTG addition to cultures of strain 2011 (pSRKGm-rnTrpL), no change in  
125 the level of *rplUrpmA* was detected, although *trpC* was downregulated, thus confirming the functionality  
126 of lacZ'-rnTrpL as a *trans*-acting sRNA (Fig. 1C).

127 To explore possible reasons for this unexpected result, we tested if the different vector backbone or the  
128 presence of Tc were responsible for the observed effects on the *rplUrpmA* level (Fig. 1B). We conjugated  
129 the empty vector pRK4352 into strain 2011 (pSRKGm-rnTrpL), grew the resulting two-plasmid strain  
130 2011 (pSRKGm-rnTrpL, pRK4352) in media containing Gm and Tc, and analyzed changes in the cellular  
131 *rpmA* level at 10 min and 4 h post induction (p. i.) with IPTG. We found that, in the two-plasmid cultures,  
132 the *rpmA* mRNA level was decreased at 10 min p. i., while an increase was detected at 4 h p. i. (see  
133 Fig. 1D). This increase was similar to the increase observed in the constitutively overproducing strain  
134 2011 (pRK-rnTrpL) (compare to Fig. 1B).

135 Next, we set out to overproduce only the peptide peTrpL. For this, we cloned the sORF *trpL*, with several  
136 synonymous nucleotide substitutions (to avoid RNA-based interaction with *rplUrpmA*) and without rare  
137 codons, in frame with the *lacZ* start codon in plasmid pSRKGm. We found that IPTG-induced  
138 overproduction of peTrpL (alone) was sufficient for the above described effects on *rpmA*, provided that  
139 pRK4352 was also present in the used strain and, thus, Tc was included in the growth medium (Fig. 1E  
140 and 1F). This effect of the leader peptide was specific to *rpmA*, since the levels of *trpC* and *trpE* remained  
141 unchanged (Fig. 1F).

142 Taken together, the results shown in Fig. 1 lead us to conclude that a decrease in the cellular level of  
143 *rpmA* mRNA (representing *rplUrpmA*) is probably a primary effect of peTrpL overproduction in strain  
144 2011, while the increase after long-term peTrpL overproduction is a downstream effect. Furthermore,  
145 we conclude that the observed changes in the *rpmA* level may depend on Tc.

146

#### 147 **Both peTrpL and rnTrpL are required for *rplUrpmA* downregulation**

148 Next, we analyzed the short-term effects of rnTrpL and peTrpL on *rplUrpmA* in a  $\Delta trpL$  background.  
149 Strain 2011 $\Delta trpL$  (pSRKGm-rnTrpL, pRK4352) was grown in medium containing Tc and Gm. At 10 min  
150 p. i. of lacZ'-rnTrpL (and of peTrpL encoded by this sRNA), the *rpmA* level was decreased like in strain  
151 2011 that still harbored the chromosomal *trpL* gene (Fig. 2A; compare to Fig. 1D). Interestingly, if  
152 2011 $\Delta trpL$  (pSRKGm-peTrpL, pRK4352) was used (i.e., a  $\Delta trpL$  strain that only produces peTrpL upon  
153 induction), no significant change in the *rpmA* level was observed (Fig. 2A), suggesting that the negative  
154 effect on *rpmA* required the presence of both the peptide and the sRNA. To test this, we used two  
155 plasmids that (separately) conferred the sRNA function (pRK-rnTrpL-AU1,2UA; the AU1,2UA mutation  
156 in rnTrpL inactivates the sORF *trpL*, see Fig. 2B) or the peptide function (pSRKGm-peTrpL). A decrease  
157 in the *rpmA* level was detected only if both the sRNA and the peptide were produced (Fig. 2C), providing  
158 evidence that both peTrpL and rnTrpL are required to downregulate *rplUrpmA*.

159

## 160 **Tetracycline is also required for downregulation of *rplUrpmA* by rnTrpL and peTrpL**

161 To investigate a possible involvement of Tc in the regulation of *rplUrpmA* by rnTrpL and peTrpL, cells of  
162 strain 2011 $\Delta$ *trpL* (pSRKGm-rnTrpL, pRK4352) were washed and grown for 4 h in medium without Tc to  
163 exclude possible effects of Tc on gene expression (pRK4352 was not lost during growth without Tc;  
164 qPCR data not shown). Then, lacZ'-rnTrpL production (and, as a result, peTrpL production) were  
165 induced with IPTG (Fig. 3A). After 10 min, Tc was added and the cells were incubated for another 10  
166 min with IPTG and Tc. RNA was isolated at 0, 10 and 20 min (Fig. 3A) and changes in the *rpmA* levels  
167 were analyzed. In parallel, control cultures were exposed to IPTG only, to Tc only or to Tc before IPTG  
168 was added. Fig. 3B shows that the *rpmA* level was only decreased if both IPTG and Tc were present in  
169 the medium. The *rpmA* level was not changed if lacZ'-rnTrpL production was induced with IPTG in Tc-  
170 free medium (t = 10 min in Fig. 3A; see the bar marked with an asterisk in Fig. 3B). Importantly, 10 min  
171 after Tc addition to this IPTG-induced culture, the *rpmA* level decreased (t = 20 min in Fig. 3A; see the  
172 bar marked with two asterisks in Fig. 3B). Since the *rpmA* decrease was similar at 10 min and 20 min  
173 after simultaneous addition of IPTG and Tc (see the two left bars in Fig. 3B), the observed change in  
174 the *rpmA* level at 10 min after Tc addition to the IPTG-induced culture (t = 20 min in Fig. 3A, the bar  
175 marked with two asterisks in Fig. 3B) can be attributed to the Tc exposure. This Tc-dependent regulation  
176 was specific to *rplUrpmA*, since the level of the *trpC* mRNA was always decreased upon lacZ'-rnTrpL  
177 induction, regardless of the presence or absence of Tc, and the level of *trpE* was essentially not changed  
178 (Fig. S2). Together, these results suggested that Tc directly contributes to the down-regulation of  
179 *rplUrpmA* by rnTrpL and peTrpL.

180

## 181 **The sRNA rnTrpL base pairs with *rplU* and destabilizes *rplUrpmA* mRNA in a Tc-dependent** 182 **manner**

183 The results from the above experiments defined the conditions necessary to observe the putative  
184 primary effect of rnTrpL on *rplUrpmA*: presence of peTrpL and Tc in addition to the sRNA. This allowed  
185 us to test experimentally *in vivo* the predicted base-pairing between rnTrpL and *rplU* in *rplUrpmA* mRNA  
186 (Fig. 4A). We performed two-plasmid assays in strain 2011 $\Delta$ *trpL* using existing lacZ'-rnTrpL derivatives  
187 (transcribed from pSRKTc conferring resistance to Tc; Melior et al., 2019) and bicistronic  
188 *rplUrpmA'*::*egfp* reporter constructs (on pSRKGm conferring resistance to Gm, Fig. S1). Each  
189 *rplUrpmA'*::*egfp* construct was co-induced with wild type or mutated lacZ'-rnTrpL and fluorescence was  
190 measured at 20 min after IPTG addition. Fig. 4B shows that L27'-EGFP fluorescence derived from  
191 plasmid pSRKGm-*rplUrpmA'*-*egfp* was strongly decreased if lacZ'-rnTrpL was co-expressed, in line with  
192 the idea that the sRNA binds to *rplU* and thereby induces a reduction of *rplUrpmA'*::*egfp* mRNA levels.  
193 In contrast, sRNA derivatives harboring the GG46,47CC and CG40,41GC mutations, respectively (see  
194 Fig. 2B), did not cause this effect (Fig. 4B). Importantly, compensatory mutations in the *rplUrpmA'*::*egfp*  
195 transcript (CC/GG exchange at positions 221 and 222 of the *rplU* ORF, see Fig. 4A), which were  
196 designed to restore the base-pairing to rnTrpL-GG46,47CC, specifically restored the negative effect of  
197 the sRNA on fluorescence levels (Fig. 4B). Similarly, the introduction of a compensatory mutation,

198 G228C, into *rplU* (Fig. 4A) could be shown to cause a down-regulation of the reporter by rnTrpL-  
199 CG40,41GC (Fig. 4B). These results validate the base-pairing between rnTrpL and *rplU* and show that  
200 even subtle changes in the base-pairing interactions may have a major impact on the downregulation  
201 of *rplUrpmA*.

202 The downregulation of *rplUrpmA* by base-pairing with rnTrpL may be explained by a destabilization of  
203 the mRNA. Consistent with this hypothesis, we observed that, upon lacZ'-rnTrpL induction in strain  
204 2011 $\Delta$ *trpL* (pSRKTc-rnTrpL) grown in medium with Tc, the half-life of *rpmA* was shortened, while that  
205 of the control mRNA *rpoB* was not changed (Fig. 5A). Since the interaction site of the sRNA rnTrpL is  
206 located in *rplU* (Fig. 4A), this result suggests that the bicistronic *rplUrpmA* mRNA is destabilized by the  
207 sRNA. To confirm this and to demonstrate that Tc is involved in the destabilization, the half-lives of *rplU*  
208 and *rpmA* were measured in strain 2011 $\Delta$ *trpL* (pSRKGm-rnTrpL) grown in medium with Gm, which was  
209 exposed to IPTG and/or Tc. The half-lives of *rplU* and *rpmA* mRNA were significantly shortened 10 min  
210 p. i. only if Tc was applied in addition to IPTG (see Fig. 5B for *rpmA* and Fig. S3 for *rplU*).

211 Together, the data in Fig. 4 and Fig. 5 strongly suggest that, in the presence of Tc, rnTrpL directly  
212 interacts with *rplU* and destabilizes *rplUrpmA* mRNA.

213

#### 214 **peTrpL and rnTrpL form a tetracycline-dependent complex with *rplUrpmA***

215 Based on the above data, we hypothesized that peTrpL, rnTrpL, Tc and *rplUrpmA* mRNA form a complex  
216 in *S. meliloti*. To isolate this complex, we decided to produce an N-terminally triple FLAG-tagged version  
217 of TrpL (3xFlag-peTrpL) and to perform coimmunoprecipitation (CoIP) experiments. First, we tested  
218 whether 3xFlag-peTrpL is functional. We detected a decrease in the *rpmA* level at 10 min post IPTG  
219 addition to cultures of strain 2011 (pSRKGm-3xFlag-peTrpL, pRK4352) (Fig. 6A). Although this  
220 decrease was less pronounced than the decrease caused by wild type peTrpL, this result suggested  
221 that 3xFlag-peTrpL largely retained the functionality of the native peptide. However, we found that the  
222 3xFlag-peTrpL peptide is non-functional in the deletion mutant 2011 $\Delta$ *trpL*, suggesting that the leader  
223 peptide acts as a dimer or multimer, and the tagged peptide may form functional complexes with the  
224 wild type peptide. Therefore, for the subsequent analyses, 3xFlag-peTrpL was produced in strain 2011  
225 with the wild type *trpL* background.

226 For the CoIP, lysates were prepared at 10 min after IPTG addition to cultures of strain 2011 (pSRKGm-  
227 3xFlag-peTrpL, pRK4352) and the control strain 2011 (pSRKGm-peTrpL, pRK4352), respectively. To  
228 account for a possible role of Tc in ribonucleoprotein complex formation, the beads were divided into  
229 two fractions after incubation of the lysate with FLAG tag-specific antibodies coupled to beads. One  
230 fraction was washed with a Tc-containing buffer (2  $\mu$ g/ml Tc, tenfold less than the Tc concentration in  
231 the medium), while the second fraction was washed with buffer without Tc. Then, coimmunoprecipitated  
232 RNA was purified and analyzed by qRT-PCR. The sRNA rnTrpL was strongly enriched by CoIP with the  
233 3xFLAG-peTrpL, but only if Tc was present in the washing buffer (Fig. 6B). Similarly, *rplUrpmA* could  
234 be coprecipitated in a Tc-dependent manner, while none of the control mRNAs (*trpC*, *trpE*) could be  
235 coprecipitated (Fig. 6B). These data support the idea that interactions between the attenuator sRNA

236 rnTrpL, the leader peptide peTrpL and their target mRNA *rplUrpma* are facilitated by (or even dependent  
237 on) the presence of Tc.

238 We also analyzed the CoIP-RNA by RNA-seq, revealing that, in addition to rnTrpL and *rplUrpma*, the  
239 corresponding antisense RNAs (asRNAs) were also coimmunoprecipitated (Fig. 6C). Tc-dependent  
240 enrichment of the anti-rnTrpL and anti-*rplUrpma* transcripts by the CoIP was validated by qRT-PCR  
241 (Fig. 6B). While a transcription start site (TSS) of an anti-rnTrpL RNA was annotated previously, no TSS  
242 for the asRNA complementary to *rplUrpma* was known (Schlüter et al., 2013). We tested the region  
243 downstream of *rplUrpma* for antisense promoter activity using a transcriptional fusion with a reporter  
244 *egfp* mRNA (Fig. S1) and observed a strong induction of antisense transcription upon exposure to Tc.  
245 The level of the reporter *egfp* mRNA was increased 13-fold ( $\pm 4$ ). This explains the co-purification of the  
246 anti-*rplUrpma* RNA from a culture grown in medium with Tc, and suggests that asRNAs may play a role  
247 in a Tc-dependent regulation of *rplUrpma* expression.

248 To provide additional evidence for a Tc-dependent complex between peTrpL, rnTrpL and *rplUrpma*, we  
249 decided to produce a 5'-terminally tagged MS2-rnTrpL sRNA in *S. meliloti* and to isolate it together with  
250 its interaction partners using an MS2-MBP fusion protein coupled to amylose beads as described by  
251 Smirnov et al. (2016). First we tested the functionality of the tagged sRNA in strain 2011 $\Delta$ *trpL* (pRK-  
252 MS2-rnTrpL, pSRKGm-peTrpL). After 10 min induction of peTrpL production, a decrease in the *rpmA*  
253 level was detected (Fig. S4). In contrast, such a decrease was not detected if (instead of pRK-MS2-  
254 rnTrpL, from which MS2-rnTrpL is transcribed) the negative control plasmid pRK-MS2 encoding the  
255 MS2 aptamer only was used. Based on these data, we concluded that peTrpL is capable to  
256 downregulate *rplUrpma* with the help of the sRNA MS2-rnTrpL (Fig. S4).

257 Then, lysates of 2011 $\Delta$ *trpL* (pRK-MS2-rnTrpL, pSRKGm-peTrpL) cultures were prepared at 10 min post  
258 IPTG addition and affinity chromatography was performed. The MS2-MBP amylose beads were washed  
259 in buffer containing or lacking Tc as described above, and the elution fractions were analyzed by qRT-  
260 PCR. Fig. 7A shows that, as expected, MS2-rnTrpL was strongly enriched in the elution fractions  
261 independently of the presence of Tc in the washing buffer. Compared to the amounts of rnTrpL, very  
262 low amounts of asRNA were co-purified, which probably originated from spurious transcription from the  
263 plasmid. Importantly and in line with the results shown in Fig. 6, *rplUrpma* and its asRNA were co-  
264 purified only if washing buffer that contained Tc was used (Fig. 7A).

265 As controls, *trpC* and *trpE* were analyzed. Concerning the Tc-independent target *trpC* (representative  
266 of *trpDC*), we made the following observations: i) relatively low amounts of *trpC* were co-purified when  
267 Tc was present in the washing buffer; ii) the amount of co-purified *trpC* was significantly higher when  
268 buffer without Tc was used in the washing procedure; iii) no asRNA complementary to *trpC* was co-  
269 purified (Fig. 7A). The last observation suggests that asRNA is not involved in the *trpDC* regulation by  
270 rnTrpL. Further, the increased co-purification of *trpC* upon washing without Tc suggests that, during the  
271 washing step (performed in batch), *rplUrpma* and peTrpL were released from MS2-rnTrpL and,  
272 concomitantly, the remaining *trpD* present in the residual diluted lysate was bound. This suggestion was  
273 corroborated *in vitro* (see below and Fig. 8D). Finally, *trpE* mRNA (a negative control that does not



274 interact with rNTrpL) was not co-purified, showing the specificity of target mRNA copurification with MS2-  
275 rNTrpL (Fig. 7A).

276 To test for the presence of the leader peptide in the Tc-dependent MS2-rNTrpL-complex, we took  
277 advantage of the 3xFLAG-peTrpL (4.5 kDa) because we were not able to detect the very small peTrpL  
278 (1.8 kDa) by SDS-PAGE. Strain 2011 (pRK-MS2-rNTrpL, pSRKGm-3xFLAG-peTrpL) was used for MS2-  
279 MBP affinity chromatography, and the elution fractions were analyzed by a Tricine-SDS-PAGE. We  
280 detected a small protein migrating at approximately 13 kDa, which was copurified with MS2-rNTrpL only  
281 if the Tc-containing buffer was used (Fig. 7B, lane 2). This band was identified by Western blot analysis  
282 (Fig. S5) and mass spectrometry (Table S1) as aberrantly migrating 3xFLAG-peTrpL. The lack of  
283 3xFLAG-peTrpL in the MS2-rNTrpL sample that was washed with buffer without Tc (Fig. 7B, lane 1)  
284 confirmed that Tc is required for the copurification of the leader peptide with the attenuator sRNA. Other  
285 proteins were not detected in the purified complex (Fig. S6).

286 Taken together, the data shown in Fig. 6 and Fig. 7 strongly suggest that peTrpL, rNTrpL and *rplUrpmA*  
287 form an antibiotic-dependent ribonucleoprotein complex (ARNP) that also contains asRNA.

288

### 289 **Tetracycline causes ARNP assembly and redirection of rNTrpL from *trpD* to *rplU***

290 To demonstrate that Tc mediates the ribonucleoprotein complex formation, we studied *in vitro* complex  
291 disassembly by diluting an ARNP sample (and thus lowering the concentration of Tc, among others),  
292 and reassembly by raising the Tc concentration in the diluted sample. First the disassembly of ARNP  
293 purified via MS2-rNTrpL from strain 2011 $\Delta$ *trpL* (pRK-MS2-rNTrpL, pSRKGm-peTrpL) was analyzed.  
294 Five-fold dilution of the sample resulted in a profoundly reduced interaction between MS2-rNTrpL and  
295 *rplUrpmA* (Fig. 8A). Therefore, this dilution, which decreased the Tc concentration from 2  $\mu$ g/ml (High-  
296 Tc, H) to 0.4  $\mu$ g/ml (Low-Tc, L), was used for complex disassembly in subsequent experiments.

297 The reassembly was tested by adding 5  $\mu$ g synthetic 3xFLAG-peTrpL to an ARNP sample that  
298 contained 2.4  $\mu$ g protein. The sample (in High-Tc buffer) was divided in three portions. Two control  
299 portions, which were diluted 5-fold, were kept at High-Tc or Low-Tc conditions for 10 min (10' H and 10'  
300 L, respectively). The third portion was first subjected to complex disassembly (5-fold dilution and  
301 incubation at Low-Tc for 3 min; 3' L) and then the Tc concentration was raised to reassemble ARNPs  
302 (incubation at High-Tc for 7 min; 7' H). The three samples were analyzed by MS2-MBP affinity  
303 chromatography (Fig. 8B) and by CoIP with FLAG-specific antibodies (Fig. 8C). When MS2-MBP affinity  
304 chromatography was conducted, the 3xFLAG-peTrpL was co-purified with MS2-rNTrpL only from the  
305 sample that was subjected to disassembly and reassembly, but not in the control samples (Fig. 8B).  
306 Consistently, Fig. 8C shows that *rpmA* mRNA was also coimmunoprecipitated with 3xFLAG-peTrpL only  
307 from the sample in which complex disassembly and reassembly took place. This result shows that,  
308 during reassembly, the synthetic peptide entered the complex. Additional reassembly experiments are  
309 shown in Fig. S7. Together, Fig. 8A, 8B and 8C confirm that Tc is crucial to the ARNP formation.

310 Next, we tested *in vitro* the impact of Tc on the substrate preference of rNTrpL. For this we designed  
311 mini-*rplU* and mini-*trpD* *in vitro* transcripts encompassing the respective rNTrpL-binding sites (for

312 predicted secondary structures see Fig. S8). An ARNP complex purified from strain 2011 (pRK-MS2-  
313 rnTrpL) was used. It contained *rplU* (representing *rplUrpmA*) which was released under Low-Tc  
314 conditions (see the controls in Fig. 8D). The ARNP complex was disassembled at Low-Tc for 3 min, and  
315 then the two mini-transcripts were added in a ratio of 1:1 (300 ng of each transcript). The sample was  
316 split: one half was kept at Low-Tc, while the Tc concentration of the second half was raised to  
317 reconstitute ARNPs under High-Tc conditions. After seven minutes, MS2-MBP affinity chromatography  
318 was performed and the transcripts co-purified with MS2-rnTrpL were analyzed by qRT-PCR. Fig. 8D  
319 shows that under Low-Tc conditions mostly mini-*trpD* was co-purified (see bars [3' L, + mini-Tr., 7' L] in  
320 Fig. 8D). In contrast, when the Tc concentration was raised, exclusively *rplU* (mini-*rplU* and probably  
321 endogenous *rplU*) was co-purified (see bars [3' L, + mini-Tr., 7' H] in Fig. 8D). This result supports the  
322 view that Tc (with the help of peTrpL) redirects the sRNA rnTrpL from targets such as *trpDC* to *rplUrpmA*.

323

### 324 **ARNP reconstitution reveals a four-component core complex**

325 To analyze the ARNP formation in more detail, we conducted reconstitution experiments with synthetic  
326 components only. A 1:1 mixture of synthetic peTrpL and 3xFLAG-peTrpL peptides was incubated with  
327 *in vitro* transcripts of MS2-rnTrpL and/or mini-*rplU*. The samples were supplemented with 2 µg/ml Tc or  
328 were incubated without Tc, and CoIP with FLAG-specific antibodies was performed. The  
329 coimmunoprecipitated RNAs (RNAs interacting with 3xFLAG-peTrpL under the particular conditions)  
330 were analyzed by qRT-PCR. Fig. 9A shows that only when all four components, 1) the sRNA MS2-  
331 rnTrpL, 2) the target RNA mini-*rplU*, 3) peptide (peTrpL and 3xFLAG-peTrpL), and 4) Tc were present  
332 in the mixture, both transcripts were coimmunoprecipitated with the peptide. The lack of one of the  
333 components (Tc, MS2-rnTrpL or mini-*rplU*) abolished complex formation with the peptide. The above  
334 result shows that the four components sRNA, target RNA, peptide and Tc are necessary and sufficient  
335 for the formation of a core ARNP.

336 We also tested whether an anti-*rplU* transcript would have an influence on the ARNP formation. Fig. 9B  
337 shows that addition of the asRNA to the reconstitution mixture strongly increased the amount of mini-  
338 *rplU* that was co-purified with MS2-rnTrpL, while unrelated, control RNAs had no effect. Thus, the  
339 asRNA increases the efficiency of ARNP formation *in vitro*. This result suggests that, in *S. meliloti*, the  
340 Tc-induced anti-*rplUrpmA* may have a supportive role in *rplUrpmA* downregulation upon exposure to  
341 Tc.

342

### 343 **The *trp* attenuator responds to Tc exposure by generation of the sRNA rnTrpL**

344 The above results show that the products of the *trp* attenuator, the sRNA rnTrpL and the leader peptide  
345 peTrpL, are involved in the posttranscriptional downregulation of *rplUrpmA* upon exposure to Tc. What  
346 could be the functional relevance of such a regulatory pathway? Given that, in this pathway, ribosomal  
347 genes are regulated and Tc inhibits translation (Nelson and Levy, 2011; Chopra and Roberts, 2001), it  
348 is tempting to speculate that it represents a response to translation inhibition. We propose that the *trp*  
349 attenuator got involved in this regulation because it is well suited to sense stalled ribosomes.

350 As mentioned in the introduction, it is known that, in *E. coli*, pausing of the ribosome in the first half of  
351 the uORF *trpL* results in transcription termination (Zurawski et al., 1978) and thus in the release of the  
352 attenuator sRNA. Based on this, we hypothesized that, in addition to sensing the availability of charged  
353 tRNA<sup>Trp</sup>, the *trp* attenuator senses translation inhibition as an independent stimulus and responds by the  
354 generation of rnTrpL. Thus, even under conditions of Trp limitation, when *trpLE(G)* should be co-  
355 transcribed, exposure to Tc would arrest ribosomes at the start of *trpL* in new transcripts, and their  
356 transcription would be terminated. The released rnTrpL could then interact with Tc and peTrpL (which  
357 should be present in the cell because it is translated at least once by each transcription event) and  
358 downregulate *rplUrpmA*. Thus, we propose that, upon exposure to Tc, the *trp* attenuator is used by the  
359 cell to supply the sRNA rnTrpL independently of the Trp availability.

360 To test this hypothesis, we used strain 2011 $\Delta$ *trpC*, in which the attenuation can be easily assessed (Bae  
361 and Crawford, 1990; Melior et al., 2019). After 4 h of growth under Trp-limiting conditions (minimal  
362 medium supplemented with 2  $\mu$ g/ml Trp), rnTrpL was essentially non-detectable in the Northern  
363 hybridization (Fig. 10A, lanes 2 and 3), a result that is consistent with the expected *trpLE(G)*  
364 cotranscription. Addition of 1.5  $\mu$ g/ml Tc to this culture (the minimal inhibitory Tc concentration under  
365 these conditions was 2  $\mu$ g/ml) resulted in increased rnTrpL levels (Fig. 10A, lanes 4 and 5). This is in  
366 line with the proposed transcription termination as a consequence of ribosome pausing at the first *trpL*  
367 codons. Accordingly, removal of Tc from the medium led again to a decrease in the rnTrpL levels  
368 (compare lanes 7 and 8 in Fig. 10A). These results support the idea that the *trp* attenuator can sense  
369 translation inhibition as an independent signal. They prove that, upon translation inhibition, the  
370 regulatory sRNA rnTrpL is generated even under Trp limiting conditions, in line with its Trp-independent  
371 role in *rplUrpmA* destabilization (see Fig. 10C).

372

### 373 **The leader peptide peTrpL strongly accumulates upon exposure to Tc**

374 According to our data, downregulation of *rplUrpmA* in the presence of Tc is mediated by rnTrpL and  
375 peTrpL (in combination). However, nothing is known about the abundance of peTrpL under different  
376 conditions, especially upon exposure of bacteria to Tc. Therefore, we used mass spectrometry to  
377 determine the amount of peTrpL in bacterial lysates. As a standard, we used a heavy synthetic peptide  
378 (with a heavy C-terminal arginine). *S. meliloti* 2011 was grown in rich TY medium or in minimal medium  
379 with 2  $\mu$ g/ml Trp. At OD<sub>600</sub> = 0.5, the cultures were divided into two halves. To one of them, 1.5  $\mu$ g/ml  
380 Tc was added, and the second (control) sample was supplemented with the corresponding amount of  
381 solvent (ethanol). Cells were harvested 10 min after this treatment and the endogenous peTrpL peptide  
382 was quantified (Fig. 10B). In the control TY cultures, the peTrpL amount was very low (2,3 fmol/ $\mu$ l lysate),  
383 while in the Tc-treated cultures the amount was 100-fold higher. In the control cultures grown in minimal  
384 medium, the peptide was under the limit of detection, but the exposure to Tc resulted in its strong  
385 accumulation, in line with its function under these conditions (Fig. 10B and Fig. 10C).

386

387

388 **Several translation inhibitors support the complex of peTrpL, rnTrpL and *rplUrpmA***

389 The data presented above strongly suggest that *rplUrpmA* downregulation by rnTrpL and peTrpL is a  
390 response to translation inhibition by Tc. They prompted us to test whether downregulation is also  
391 triggered by other translation inhibiting antibiotics such as erythromycin (Em), chloramphenicol (Cl) and  
392 kanamycin (Km). As a negative control, the transcription inhibitor rifampicin (Rf) was included, and Tc  
393 was used as a positive control. The antibiotics were added in subinhibitory concentrations to cultures of  
394 the parental strain 2011 and the deletion mutant 2011 $\Delta$ *trpL* and, 10 min post addition, changes in the  
395 levels of *rpmA* and the control mRNA *trpE(G)* were analyzed by qRT-PCR. Fig. 11A shows that, in strain  
396 2011, the *rpmA* level was decreased when Tc, Em, Cl or Km were applied, but not upon addition of Rf.  
397 In contrast, an *rpmA* decrease was not detected in strain 2011 $\Delta$ *trpL* after exposure to the translation  
398 inhibitors. Further, the mRNA *trpE(G)* was not significantly affected in both strains (Fig. 11A). These  
399 results support the critical role of the *trp* attenuator (and its *trans*-acting products) in *rplUrpmA*  
400 downregulation upon exposure to translation inhibitors.

401 Next, we tested whether (similar to Tc) the translation inhibiting antibiotics Em, Cl and Km support the  
402 formation of complexes involving peTrpL, rnTrpL and *rplUrpmA*. For this, strain 2011 (pSRKGm-  
403 3xFLAG-peTrpL) was grown in Gm-containing medium. Simultaneously to the induction of 3xFLAG-  
404 peTrpL production by adding IPTG, one of the antibiotics Tc, Em, Cl, Km or Rf was added. 10 min later,  
405 a CoIP with 3xFLAG-peTrpL was conducted, and one half of the beads of each CoIP was washed with  
406 a buffer containing the respective antibiotic, while the other half was washed with a buffer lacking the  
407 antibiotic. qRT-PCR analysis revealed that rnTrpL and *rplUrpmA* but not *trpE(G)* were  
408 coimmunoprecipitated in the presence of Em, Cl, Km and the positive control Tc, but not in the presence  
409 of Rf (Fig. 11B). Similar to the data shown before for cultures containing a Tc-resistance plasmid and  
410 grown at selective Tc concentration (20  $\mu$ g/ml) (Fig. 6B), the experiments using subinhibitory  
411 concentrations of the various translation-inhibiting antibiotics revealed that an asRNA complementary  
412 to *rplUrpmA* was co-purified (Fig. 11B).

413 Together, these results suggest that (similar to Tc) the translation inhibitors Em, Cl and Km promote the  
414 formation of an ARNP that is involved in *rplUrpmA* destabilization. Thus, the posttranscriptional  
415 downregulation of *rplUrpmA* by peTrpL and rnTrpL is probably a general response to translation-  
416 inhibiting antibiotics.

417

418 **Conservation of rnTrpL and peTrpL functions in other bacteria despite sequence heterogeneity**

419 To determine functionally important residues in peTrpL of *S. meliloti*, we performed alanine scanning  
420 mutagenesis and tested the functionality of the mutagenized peptides in strain 2011. Compared to the  
421 wild type peptide peTrpL, Ala substitutions of Thr4, Ser8 and Trp12, respectively, had the strongest  
422 impact. Induced production of these mutated peptides for 10 min led to increased (rather than  
423 decreased) *rpmA* levels (Fig. 12A). The Ala substitutions of the Trp10 and Trp11 residues abolished the  
424 effect of peTrpL overproduction, suggesting that all three Trp residues are important for the function of  
425 peTrpL (Fig. 12A).

426 Next, we analyzed the conservation of peTrpL in the genus *Sinorhizobium* and in other *Rhizobiales*. *In*  
427 *silico* analysis of putative peTrpL peptides revealed several groups of conserved leader peptides that  
428 generally conform to the taxonomy (Fig. S9 and Table S2). However, no strong sequence conservation  
429 was found, with the exception of the consecutive Trp codons defining the attenuator. The consensus  
430 peTrpL sequences of the genera *Sinorhizobium*, *Agrobacterium* and *Bradyrhizobium* groups are shown  
431 in Fig. 12B. Surprisingly, the functionally important residues Thr4 and Ser8 of *S. meliloti* peTrpL are not  
432 conserved even within the *Sinorhizobium* group.

433 Despite the lack of peTrpL sequence conservation, we tested whether the role of rnTrpL and peTrpL in  
434 *rplUrpmA* regulation is conserved in *Agrobacterium tumefaciens* (which, together with *S. meliloti*,  
435 belongs to *Rhizobiaceae*), and in the more distantly related *Bradyrhizobium japonicum* (a  
436 *Bradyrhizobiaceae* member). In both species, the mRNA level of *rplUrpmA* was specifically decreased  
437 when the respective peTrpL homolog Atu-peTrpL or Bja-peTrpL was overproduced from a Tc resistance-  
438 conferring plasmid (Fig. 12C). Similar results were obtained upon overproduction of the sRNA homologs  
439 (Fig. S10). Thus, the function of peTrpL in the regulation of *rplUrpmA* seems to be conserved in these  
440 Alphaproteobacteria.

441

## 442 Discussion

443 This proof of principle study establishes that bacterial leader peptides can exert conserved functions in  
444 *trans*. Our data provide strong evidence that, in *S. meliloti*, the 14-aa leader peptide peTrpL is involved  
445 in destabilization of *rplUrpmA* mRNA upon exposure to representative translation-inhibiting antibiotics.  
446 This downregulation of *rplUrpmA* expression by peTrpL depended on the presence of the attenuator  
447 sRNA rnTrpL and Tc or other translation-inhibiting antibiotics (Fig. 1G, Fig. 2, Fig. 3 and Fig. 11A).

448 We provide conclusive evidence that the sRNA rnTrpL base pairs with *rplU* and that this direct interaction  
449 downregulates the *rplUrpmA* mRNA levels (Fig. 4). The identification of *rplUrpmA* as a direct target of  
450 rnTrpL extends the list of confirmed interactions of this particular sRNA. Interestingly, the downregulation  
451 of the previously identified target *trpDC* (Melior et al., 2019) did not depend on peTrpL or Tc (Fig. 1C  
452 and Fig. S2), suggesting that interactions of rnTrpL with its diverse targets may be facilitated by different  
453 mechanisms. The special requirement of both peTrpL and an antibiotic for *rplUrpmA* downregulation  
454 probably ensures that rnTrpL can be efficiently redirected from other mRNAs (such as *trpDC*) to this  
455 alternative target under conditions of translation inhibition. In support of this hypothesis, we were able  
456 to demonstrate *in vitro* the redirection of the rnTrpL sRNA from *trpD* to its Tc-dependent target *rplU* (Fig.  
457 8D).

458 The antibiotic-triggered, posttranscriptional downregulation of *rplUrpmA* identified in this study probably  
459 serves to adjust the production and/or function(s) of ribosomes. Lower levels of *rplUrpmA* mRNA may  
460 negatively influence ribosome biogenesis and/or result in ribosomes lacking the L21 and L27 proteins.  
461 While the function of L21 is not clear, *E. coli* L27-deficient mutants were shown to have reduced peptidyl  
462 transferase activities (Maguire et al., 2005). Interestingly, a two-fold reduction of *rplUrpmA* expression  
463 in *Pseudomonas aeruginosa* leads to an increased expression of multidrug efflux pump genes and  
464 increased resistance to aminoglycosides. This was explained by attenuation of transcription termination,

465 caused by pausing of L21- and L27-less ribosomes (Lau et al., 2012). It therefore seems reasonable to  
466 suggest that, in *S. meliloti*, the downregulation of *rplUrpmA* by rnTrpL and peTrpL may have similar  
467 adaptation effects mediated by specific changes in translation.

468 Another notable finding of our work is the generation of the sRNA rnTrpL upon translation inhibition,  
469 even under conditions of Trp insufficiency. We show that bacteria utilize the same uORF and two  
470 mutually exclusive RNA structures for two different purposes: 1) to regulate *trpE(G)* expression by  
471 transcription attenuation in response to Trp availability (Bae and Crawford, 1990) and 2) to achieve  
472 transcription termination between *trpL* and *trpE(G)* upon translation inhibition even under conditions of  
473 Trp shortage (Fig. 10A). In most ribosome-dependent transcription attenuators of amino acid  
474 biosynthesis operons, the relevant codons are located in the 3'-half of the uORF (Vitreschak et al., 2004).  
475 Translation inhibition at such attenuators would also generate sRNAs with potential functions in *trans*.  
476 The rnTrpL sRNA production upon ribosome pausing in the 5'-part of the uORF *trpL* may have additional  
477 implications. We note that, in all *Sinorhizobium* species, two asparagine and one glutamine codon(s)  
478 are located in the first half of *trpL*. Pausing of the ribosome at these codons, for example upon shortage  
479 of aminoacylated tRNA<sup>Asn</sup> and tRNA<sup>Gln</sup>, could also result in rnTrpL production. Thus, *trpL* is well-suited  
480 for sensing nitrogen depletion in *Sinorhizobium*. Furthermore, since all biosynthetic, ribosome-  
481 dependent attenuators have the capacity to respond to translation inhibition, it seems reasonable to  
482 suggest that attenuator sRNAs are generated under stringent response conditions and may play  
483 important roles in the stress response and/or subsequent recovery pathways.

484 We note that the *trp* attenuator of the 5'-leader of *trpE(G)* is strikingly multifunctional (Fig. 10C, Fig. 13).  
485 Few other bacterial 5'-UTRs are known to respond to different intercellular signals or to act both in *cis*  
486 and in *trans*. The 5'-UTR of *mgtA*, which encodes a Mg<sup>2+</sup> transporter in *Salmonella*, is one of the few  
487 examples of a *cis*-acting attenuator that is capable of sensing disparate signals. It harbors a proline-rich  
488 uORF and can respond to proline shortage or a decline in Mg<sup>2+</sup> concentrations (Park et al., 2010;  
489 Chadani et al., 2017). Metabolite-binding riboswitches that can act in *cis* and in *trans* were described in  
490 *Listeria* and *Enterococcus* (Loh et al., 2009; DebRoy et al., 2014; Mellin et al., 2014). The *trp* attenuator  
491 of *S. meliloti* combines similar mechanisms in an exceptional complexity: 1) in *cis*, it senses two  
492 disparate signals, Trp availability (Bae and Crawford, 1990) and translation inhibition (this work); 2) the  
493 attenuator sRNA, which is released upon transcription termination, is a *trans*-acting sRNA that regulates  
494 several genes including *sinI* (Baumgardt et al., 2016), the *trpDC* operon (Melior et al., 2019) and  
495 *rplUrpmA* (this work); 3) the encoded leader peptide peTrpL is also functional in *trans* and (together with  
496 rnTrpL), can mediate the antibiotic-dependent *rplUrpmA* downregulation.

497 Interestingly, the posttranscriptional regulation of *rplUrpmA* by peTrpL and rnTrpL is intimately linked to  
498 the presence of translation-inhibiting antibiotics. The levels of peTrpL in strain 2011 were strongly  
499 increased upon exposure of the cells to Tc, in line with a specific function of the leader peptide under  
500 this condition (Fig. 10B). Further, *trpL* was also shown to be necessary for *rplUrpmA* decrease in  
501 response to the translation inhibitors Tc, Em, Cl and Km, but not to Rf, which inhibits transcription (Fig.  
502 11A). Moreover, each of these translation-inhibiting antibiotics, but not Rf, supported the production of  
503 ARNP complexes (Fig. 11B). The observed complex disassembly at low Tc concentrations (or during  
504 wash steps with buffer lacking antibiotics) suggests that the antibiotics participate in allosteric

505 interactions in the ARNPs. Such interactions would allow for fast and flexible complex formation (leading  
506 to *rplUrpmA* destabilization) or disassembly (abrogating the *rplUrpmA* destabilization) in response to  
507 changes in the intracellular antibiotics concentration. Such fast, posttranscriptional regulation would be  
508 especially useful for *S. meliloti* in its soil and rhizosphere habitat, where many antibiotic-producing  
509 microorganisms are present and competition for nutrients and space is high (Naamala et al., 2016).  
510 Therefore, we suggest that the antibiotic-triggered *rplUrpmA* downregulation by peTrpL is a part of an  
511 adaptation mechanism.

512 Unexpectedly, asRNAs were present in the ARNPs purified from *S. meliloti* (Fig. 6, Fig. 11B). However,  
513 these asRNAs did not seem to be absolutely necessary for *rplUrpmA* downregulation by rnTrpL *in vivo*,  
514 because the asRNAs were not co-induced in the two-plasmid assay showing the base-pairing between  
515 rnTrpL and *rplU* (Fig. 4). Further, asRNAs were dispensable for the reconstitution of core ARNPs *in vitro*  
516 (Fig. 9A). However, our data suggest that the anti-*rplUrpmA* RNA, which is specifically induced under  
517 antibiotic stress, may increase the efficiency of ARNP formation (Fig. 9B). Thus, *in vivo* the asRNAs  
518 may support the redirection of rnTrpL from *trpDC* to *rplUrpmA* upon antibiotic exposure.

519 The mechanism reported here for *rplUrpmA* destabilization adds another facet to the molecular  
520 responses of bacteria to antibiotics. It is well known that antibiotics are used as allosteric effectors of  
521 TetR-type repressors to induce the transcription of resistance genes (Hillen and Berens, 1994;  
522 Reichheld et al., 2009). Additionally, ribosome stalling due to translation-inhibiting antibiotics has  
523 regulatory effects on transcription attenuators. Ribosomes stalled at uORFs can either prevent  
524 transcription termination and thus induce the expression of downstream resistance genes (Dar et al.,  
525 2016) or, as described here, the stalled ribosomes promote transcription termination to generate a *trans*-  
526 acting sRNA (Fig. 9A). Moreover, as shown here, bacteria can directly use the antibiotics for ARNP  
527 formation in the process of mRNA destabilization.

528 Surprisingly, despite the lack of sequence conservation beyond the Trp residues, the function of peTrpL  
529 in *rplUrpmA* downregulation is conserved among soil Alphaproteobacteria, such as the plant pathogen  
530 *A. tumefaciens* and the soybean symbiont *B. japonicum*. This probably reflects molecular adaptation to  
531 (or co-evolution with) RNA interaction partners in the respective host. The functional conservation of  
532 peTrpL suggests that ARNP-based regulatory mechanisms may also be conserved in other bacteria.

533 In summary, our work establishes a role of the leader peptide peTrpL in *trans*, extends the target  
534 spectrum of the attenuator sRNA rnTrpL, indicates that the *trp* attenuator can sense translation inhibition  
535 as a second signal, and demonstrates the formation of antibiotic-supported ribonucleoprotein  
536 complexes. We are convinced that the data described here will inspire future research on multifunctional  
537 5'-UTRs and in particular on additional functions of *trans*-acting leader peptides. More generally, our  
538 data encourage future analyses of novel interactions between antibiotics, nucleic acids and proteins and  
539 of the underlying mechanisms that control and regulate these interactions.

540

541

542

## 543 **Material and Methods**

### 544 **Cultivation of bacteria, conjugation, IPTG induction, antibiotics exposure and fluorescence** 545 **measurement**

546 *E. coli* was cultivated in LB, *S. meliloti* 2011 and its derivatives in rich TY or minimal GMX medium, *A.*  
547 *tumefaciens* NTL4 in TY, and *B. japonicum* 110spc4 in in PSY medium. Growth conditions and selective  
548 antibiotic concentrations were as previously described (Melior et al., 2019; Mesa et al., 2008).  
549 Alphaproteobacteria were cultivated to an OD<sub>600nm</sub> of 0.5, and then processed. Cloning procedures were  
550 performed essentially as described by Sambrook et al. (1989).

551 All oligonucleotides (primers) are listed in Table S3. They were synthesized by Microsynth (Balgach,  
552 Switzerland). The used plasmids are listed in Table S4. As vectors the conjugative, broad-host range  
553 vectors pRK4352 (Mank et al., 2012), pSRKGM or pSRKTc (Khan et al., 2008), which can replicate in  
554 *S. meliloti* and *A. tumefaciens*, were used as described (Melior et al., 2019). Alternatively, plasmids  
555 pRJPaph-MCS (Hahn et al., 2016) or a derivative of pSUP202pol4 (Fischer et al., 1993) containing 300  
556 nt of the 3' *exoP* region (Schlüter et al., 2015) were used as vectors for chromosomal integration *B.*  
557 *japonicum* or *S. meliloti*, respectively. Inserts were amplified by PCR or, for very short inserts (e.g. *trpL*  
558 ORFs with codons exchanged for synonymous codons, or with mutated codons), complementary  
559 oligonucleotides were annealed and cloned. pLK64 was used as an *egfp* template (McIntosh et al.,  
560 2008). Plasmids were transferred from *E. coli* S17-1 by conjugation (Simon et al., 1983). Constitutively  
561 overproducing strains were tested immediately after conjugation. IPTG was used at a final concentration  
562 of 1 mM for the indicated periods of time.

563 For short-term exposure of *S. meliloti* strains harboring a Tc-resistance plasmid, 20 µg/ml Tc was used.  
564 Further, following subinhibitory antibiotic concentrations were used for strains lacking resistance  
565 plasmids: 1.5 µg/ml Tc, 27 µg/ml Em, 9 µg/ml Cl, 3 µg/ml Rf, 45 µg/ml Km. A control culture was exposed  
566 in parallel to the respective solvent (ethanol, methanol or water). EGFP fluorescence was measured in  
567 Tecan Infinite M200 reader 20 min after IPTG addition to cultures of strains containing two plasmids  
568 (pSRKGM- and pSRKTc- constructs for IPTG-induced expression of *egfp* reporter fusions and the  
569 sRNA, respectively).

570 For more details, see the Supplementary Methods File.

### 571 **RNA methods**

572 Total RNA of *S. meliloti* and *A. tumefaciens* was isolated using TRIzol and hot-phenol (for Northern blot  
573 hybridization and qRT-PCR analysis) or using RNeasy columns (for RNA half-live measurements;  
574 Qiagen, Hilden, Germany) as described (Melior et al., 2019). Northern Blot hybridization with  
575 radioactively labeled oligonucleotide probes was also previously described (Melior et al., 2019). Strand-  
576 specific, real time, quantitative reverse transcriptase PCR (qRT-PCR) was performed with the Brilliant  
577 III Ultra Fast SYBR® Green QRT-PCR Mastermix (Agilent, Waldbronn, Germany): 5 µl Master Mix  
578 (supplied), 0.1 µl DTT (100 mM; supplied), 0.5 µl Ribo-Block solution (supplied), 0.4 µl water, 1 µl of the  
579 reverse primer (10 pmol/µl), and 2 µl RNA (20 ng/µl) were assembled in a 9-µl reaction mixture. After  
580 cDNA synthesis, the samples were incubated for 10 min at 96 °C to inactivate the reverse transcriptase.



581 After cooling to 4 °C, 1 µl of the second primer (10 pmol) was added, and real-time PCR was performed  
582 starting with 5 min incubation at 96 °C. Used primers and their efficiencies (determined by PCR of serial  
583 two-fold RNA dilutions) are listed in Table S3. A spectrofluorometric thermal cycler (Biorad, München,  
584 Germany) was used and the quantification cycle (Cq), was set according to (Bustin et al., 2009). As a  
585 reference, *rpoB* mRNA (for steady state level analyses) or 16S rRNA (for half-lives determination) was  
586 used (Baumgardt et al., 2016; Melior et al., 2019). Stability of mRNA was determined after addition of  
587 rifampicin was added to a final concentration of 600 µg/ml as described (Melior et al., 2019). The Pfaffl  
588 formula was used to calculate fold changes of mRNA amounts (Pfaffl, 2001). For qRT-PCR analysis of  
589 total RNA, the analysis of the gene of interest (e.g. *rpmA*) and of the reference gene *rpoB* were  
590 performed using portions of the same DNA-free RNA sample, and log<sub>2</sub>fold changes of mRNA levels  
591 after induction by IPTG and/or exposure to antibiotics were determined. For qRT-PCR analysis of  
592 coimmunoprecipitated RNA (CoIP-RNA) or RNA co-purified with MS2-rnTrpL, the real-time RT-PCR of  
593 the gene of interest was performed using a CoIP-RNA sample, while total RNA of the same culture  
594 (harvested prior to cell lysis for CoIP) was used for the *rpoB* real-time RT-PCR. Then, the Pfaffl formula  
595 was used to calculate the fold enrichment of specific RNAs by CoIP with 3xFLAG-peTrpL or by affinity  
596 chromatography with MS2-MBP, in comparison to the corresponding mock purifications.

597 RNA-seq was performed by Vertis Biotechnologie AG (Freising, Germany). cDNA reads were mapped  
598 as described (Sharma et al., 2010).

599 For *in vitro* transcription the MEGAshortscript T7 kit (Ambion) was used according to the manufacturer  
600 instructions. The T7 promoter sequence was either integrated in one of the primers for PCR amplification  
601 of the template, or it was present in oligonucleotides that were annealed to obtain double-strand  
602 template (see Table S3). TURBO-DNase was used to remove the DNA template (The *in vitro* transcript  
603 was extracted with acidic phenol, precipitated with ethanol and analysed in a 10% polyacrylamide-urea  
604 gel after staining with ethidium bromide).

605 For more details, see the Supplementary Methods File.

#### 606 **Coimmunoprecipitation of RNA with 3xFLAG-peTrpL and MS2-rnTrpL affinity purification**

607 *S. meliloti* 2011 strains containing the plasmid pSRKGm-3xFLAG-peTrpL were used for the  
608 coimmunoprecipitation (CoIP) 10 min after addition of IPTG. For the mock CoIP control pSRKGm-  
609 peTrpL was used instead. Cell pellets were resuspended in 5 ml buffer B (20 mM Tris, pH 7.5, 150 mM  
610 KCl, 1 mM MgCl<sub>2</sub>, 1 mM DTT) containing 10 mg/ml lysozyme, 2 µg/ml Tc and 1 tablet of protease  
611 inhibitor cocktail (Sigma Aldrich) per 40 ml buffer. Cells were lysed by sonication and 40 µl Anti FLAG®  
612 M2 Magnetic Beads (Sigma Aldrich) were added to the cleared lysate. After incubation at 4 °C for 2 h,  
613 the beads were collected and split into two portions. One sample was washed 3 times with 500 µl buffer  
614 B containing an antibiotic (at the indicated concentration), while the second sample was washed with  
615 buffer alone, and the beads were resuspended in 50 µl buffer B. Coimmunoprecipitated RNA was  
616 purified using TRIzol. MS2-rnTrpL affinity purification from *S. meliloti* 2011 strains containing the plasmid  
617 pRK-MS2-rnTrpL was performed using MS2-MBP fusion protein bound to amylose beads (New England  
618 Biolabs) as described by Smirnov et al. (2016). The rnTrpL derivative was tagged at the 5'-end. A mock  
619 purification using bacteria containing plasmid pRK-MS2 was performed. As described above, the beads

620 were washed with a buffer that did or did not contain an antibiotic. The RNA and protein content of the  
621 elution fractions was analyzed. For more details, see the Supplementary Methods File.

## 622 **Tricine-SDS-PAGE and Western blot analysis**

623 Tricine-SDS-PAGE was conducted according to Schägger (2006). The 16 % polyacrylamide separating  
624 gel (acrylamide:bisacrylamide 19:1) contained 8 % glycerol. Detection of FLAG-tagged proteins  
625 transferred onto a PVDF membrane was performed with monoclonal anti-FLAG M2-peroxidase (HRP)  
626 antibodies (Sigma-Aldrich) and Lumi-Light Western Blotting Substrate Kit (Roche). FLAG-tagged FLAG-  
627 FimV Protein (Rossmann et al., 2019) was used as a positive control.

## 628 **Mass spectrometry**

629 For identification of proteins in a gel slice stained with Coomassie Brilliant Blue, the band was destained  
630 and digested with trypsin as reported elsewhere (Bonn et al., 2014). To recover the peptides, gel pieces  
631 were covered with ultra-pure water and incubated 15 minutes in an ultrasonic water bath. Peptides  
632 derived from in-gel digestion were loaded on an EASY-nLC II system (Thermo Fisher Scientific)  
633 equipped with an in-house built 20-cm column (inner diameter 100  $\mu$ m, outer diameter 360  $\mu$ m) filled  
634 with ReproSil-Pur 120 C18-AQ reversed-phase material (3 mm particles, Dr. Maisch GmbH). Elution of  
635 peptides was executed with a nonlinear 80-min gradient from 1 to 99% (v/v) solvent B (0.1% (v/v) acetic  
636 acid in acetonitrile) with a flow rate of 300 nl/min and injected online into a LTQ Orbitrap XL (Thermo  
637 Fisher Scientific). The survey scan at a resolution of  $R = 30,000$  and  $1 \times 10^6$  automatic gain control  
638 target in the Orbitrap with activated lock mass correction was followed by selection of the five most  
639 abundant precursor ions for fragmentation. Singly charged ions as well as ions without detected charge  
640 states were excluded from MS/MS analysis.

641 For quantification of peTrpL abundance, protein extracts were diluted in 50 mM TEAB-Buffer, pH 8.0  
642 (Sigma-Aldrich) to a final concentration of 0.5  $\mu$ g/ $\mu$ l. After protein reduction (2.5 mM TCEP, Tris-(2-  
643 carboxyethyl) phosphine hydrochloride, Invitrogen) at 65 °C for 45 min, thiols were alkylated in 5 mM  
644 iodacetamide (Sigma) for 15 min at 25 °C in the dark. For protein digestion, trypsin (Promega) was  
645 added in an enzyme-to-substrate ratio of 1:100. After 14 h at 37 °C, digestion was terminated by adding  
646 concentrated HCl to a final concentration of 600 mM and peptides were purified by C18 Zip tips (Pierce).  
647 Prior measurement samples were spiked with synthetic peptides containing an isotopically labeled  
648 amino acid (JPT Peptide Technologies) to a final concentration of 50 fmol/ $\mu$ l. The peptides derived from  
649 in-solution digests were loaded on an EASY-nLC 1000 system (Thermo Fisher Scientific) equipped with  
650 an in-house built 20-cm column (see above). Elution of peptides was executed with a nonlinear gradient  
651 from 1 to 99% (v/v) solvent B (0.1% (v/v) acetic acid in acetonitrile) with a flow rate of 300 nl/min and  
652 injected online into a TSQ Vantage (Thermo Fisher Scientific). The selectivity for both Q1 and Q3 were  
653 set to 0.7 Da (FWHM). The instrument was operated in SRM mode applying a collision gas pressure of  
654 1.2 mTorr in Q2. The collision energy was optimized before analysis. All monitored transitions and the  
655 optimized collision energy can be found in Table S5.

## 656 **Processing of mass spectrometry data**

657 For identification of peptides from MS-spectra, a database search was performed with Sorcerer-  
658 SEQUEST (4.0.4 build, Sage-N Research) using the Sequest algorithm against a target-decoy  
659 integrated proteogenomic database (iPtgxDB; <https://iptgxdb.expasy.org/>), which also contained  
660 sequences of common laboratory contaminants and FLAG-tagged peTrpL (total entries: 320482). The  
661 *S. meliloti* 2011 iPtgxDB was created by integrating and consolidating the annotations of the  
662 chromosome (NC\_020528) and two plasmids (NC\_020527 and NC\_020560) from RefSeq (Tatusova et  
663 al., 2016) and Genoscope (Vallenet et al., 2013), with predictions from Prodigal (Hyatt et al., 2010),  
664 ChemGenome (Singhal et al., 2008) and a modified form of six-frame predicted ORFs (Omasits et al.,  
665 2017). The database search was based on a strict trypsin digestion with two missed cleavages  
666 permitted. Oxidation of methionine and carbamidomethylation of cysteine were considered as variable  
667 modifications. The mass tolerance for precursor ions was set to 10 ppm and the mass tolerance for  
668 fragment ions to 0.5 Da. Validation of MS/MS-based peptide and protein identification was performed  
669 with Scaffold V4.7.5 (Proteome Software, Portland, USA), and peptide identifications were accepted if  
670 they exceeded the following thresholds: deltaCn greater than 0.1 and XCorr scores greater than 2.2, 3.3  
671 and 3.75 for doubly, triply and all higher charged peptides, respectively. Protein identifications were  
672 accepted if at least 2 identified peptides were detected for proteins with a molecular weight of 15 kDa  
673 and higher. For proteins smaller than 15 kDa the identification of one unique peptide fulfilling the criteria  
674 mentioned above was sufficient for an identification. Normalized spectrum abundance factors (Zybailov  
675 et al., 2006) were used as proxy for protein abundance in the sample.

676 All raw files from targeted MS were processed using Skyline 4.2 (MacLean et al., 2010). A peptide ratio  
677 of native and heavy species was based on five transitions. Peptide ratios of three biological replicates  
678 were weighted according to their Dot product before being averaged. The concentration of peTrpL in  
679 the sample was calculated based on the peptide ratios and the added amount of heavy peptide.

#### 680 **Complex disassembly, reassembly and reconstitution**

681 ARNP complex was eluted from the MS2-MBP-amylose beads in buffer C (20 mM Tris, pH 8.0, 150 mM  
682 KCl, 1 mM MgCl<sub>2</sub>, 1 mM DTT) containing 2 µg/ml Tc (High-Tc conditions). For disassembly and  
683 reassembly in the presence of synthetic 3×FLAG-peTrpL (Thermo Fischer Scientific), 5 µl peptide  
684 solution (1 µg/µl; 222 pmol/µl) was added to 150 µl of the ARNP sample and three 50-µl aliquots of the  
685 sample were processed in parallel. One control aliquot was diluted five-fold with Tc-containing buffer C  
686 and incubated for 10 min under High-Tc conditions (no complex disassembly). The second aliquot was  
687 diluted five-fold in buffer C lacking Tc, incubated at the final Tc concentration of 0.4 µg/ml (Low-Tc  
688 conditions; complex disassembly), and then 4 µl Tc solution (100 µg/ml, dissolved in ethanol) was added  
689 to increase the Tc concentration of the diluted sample to 2 µg/ml. Subsequently the sample was  
690 incubated for complex reassembly at the High-Tc conditions for 7 min. The third aliquot was diluted five-  
691 fold in buffer C lacking Tc and incubated for 3 min before 4 µl ethanol was added and the sample was  
692 incubated for additional 7 min under the Low-Tc conditions. Then 70 µl MS2-MBP-amylose beads in  
693 buffer C was added to each of the three samples, and affinity chromatography was performed.  
694 Alternatively, CoIP was performed with 20 µl magnetic beads with anti-FLAG antibodies. RNA and  
695 protein content of the elution samples were analyzed.

696 Reconstitution reactions with entirely synthetic components were performed using MS2-rnTrpL (100 ng;  
697 2 pmol), mini-*rplU* (100 ng; 4.4 pmol), peTrpL (50 ng, 27 pmol) and 3xFLAG-peTrpL (50 ng, 11 pmol) in  
698 buffer C, in a final volume of 50  $\mu$ l. Addition of vitro transcribed antisense RNA (100 ng, 4.4 pmol) that  
699 is complementary to the mini-*rplU* transcript, unrelated, control *in vitro* transcript *crtA* corresponding to  
700 a *Rhodobacter sphaeroides* sequence (100 ng or 300 ng), control yeast tRNA (Sigma) (100 ng or 300  
701 ng) and/or of Tc (to a final concentration of 2  $\mu$ g/ml) is indicated. The samples were incubated for 20  
702 min at 20 °C, and then 10  $\mu$ l of MS2-MBP-amylose beads were used to purify reconstituted, MS2-rnTrpL-  
703 containing ARNP. Alternatively, reconstituted, 3xFLAG-peTrpL-containing complexes were isolated by  
704 CoIP with anti-FLAG antibodies. RNA was purified from the elution fractions and was analyzed by  
705 Northern blot hybridization and/or qRT-PCR. For other details, see text and figure legends.

## 706 **Computational analysis**

707 281 genomes of Rhizobiales were downloaded from GenBank (Benson et al., 2013) in August 2018.  
708 Intergenic regions of length 300 upstream of the gene *trpE* were extracted. We then considered all open  
709 reading frames containing at least two consecutive UGG codons and converted them into amino acid  
710 sequences of candidate leader peptides. The peptides were aligned using MUSCLE with default  
711 parameters (local alignment, open gap penalty -10, extend gap penalty -1) (Edgar, 2004). Hanging N-  
712 termini were trimmed manually, retaining the condition that candidate leader peptides should start with  
713 methionine. Phylogenetic trees were constructed based on the constructed distance matrix using R  
714 package “cluster” with default parameters (Maechler et al., 2018) by the Ward2 method (Murtagh and  
715 Legendre, 2014) and visualized using R package “ggplot2” (Wickham, 2016). Sequence logos were  
716 constructed using WebLogo (Crooks et al., 2004). The validity of predicted leader peptides was  
717 assessed by construction of alternative RNA secondary structures characteristic of attenuators using ad  
718 hoc Python scripts for the identification of overlapping RNA helices.

719 RNA-RNA interactions were predicted by IntaRNA (Mann et al., 2017) as described (Melior et al., 2019).  
720 Primer for qRT-PCR analysis were designed using Primer3 (Untergasser et al., 2012). Secondary  
721 structures of mini-*rplU* and mini-*trpD* were predicted by MFOLD (Zuker, 2003).

722

## 723 **Data availability**

724 The RNA-Seq and RIP-Seq data discussed in this publication have been deposited in NCBI's Gene  
725 Expression Omnibus (Edgar et al., 2002); accession number GSE118689. The MS data discussed in  
726 this publication have been deposited to the ProteomeXchange Consortium via the PRIDE partner  
727 repository (Vizcaíno, J. A. et al., 2016) with the dataset identifier PXD 015368 (Reviewer account details:  
728 Username: reviewer20604@ebi.ac.uk, Password: O64HhpDz). The *S. melliloti* 2011 iPtgxDB is available  
729 at <https://iptgxdb.expasy.org/database/>.

730

## 731 **Acknowledgments**

732 We are grateful to Jürgen Bartel (University of Greifswald, Germany) for excellent technical assistance  
733 in mass spectrometry. We thank Janina Gerber and Oliver Puckelwaldt (University of Giessen,

734 Germany) for help in some experiments. The peTrpL computational analysis in Alphaproteobacteria was  
735 initiated at the Summer School of Molecular and Theoretical Biology supported by the Zimin Foundation.  
736 We are grateful to Jörg Vogel (University of Würzburg, Germany) for sending us the *E. coli* strain for  
737 MS2-MBP purification and for providing the protocols for MS2-MBP affinity chromatography.

738

#### 739 **Author contributions**

740 Conceptualization, E.E.H., H.M.; Methodology, E.E.H., H.M., S.M., Z.C.; Investigation, H.M., S.M., M.S.,  
741 S.L., R.S., S.A., A.S., S.B.W., K.B.; Formal analysis, H.M., S.M., S.L., M.S., K.U., A.R.V., A.S., Z.C.,  
742 C.H.A.; Writing – Original Draft, E.E.H., H.M., J.Z.; Writing – Review and Editing, E.E.H., H.M., S.M.,  
743 Z.C., J.Z., C.H.A.; Visualization, E.E.H., H.M., S.M., S.L., A.S., Z.C.; Supervision, E.E.H., Z.C., D.B.,  
744 C.H.A.; Funding Acquisition, E.E.H.

745

#### 746 **Funding**

747 This work was funded by DFG (Ev 42/6-1; BE 3869/5-1 and Ev 42/7-1 in SPP2002; GRK2355 project  
748 number 325443116). S.L. was supported by the China Scholarship Council (No. 201708080082); Z.C.  
749 was supported by the Russian Science Foundation (18-14-00358); J.Z. was supported by the DFG  
750 (SFB1021, A01 and B01). A.R.V. was supported by a grant from the Swiss National Science Foundation  
751 (156320).

752

#### 753 **Declaration of interests**

754 The authors declare no competing interests.

755

#### 756 **References**

757 Andrews SJ, Rothnagel JA (2014) Emerging evidence for functional peptides encoded by short open  
758 reading frames. *Nat. Rev. Genet.* 15,193-204.

759 Bae YM, Crawford IP (1990) The *Rhizobium meliloti trpE(G)* gene is regulated by attenuation, and its  
760 product, anthranilate synthase, is regulated by feedback inhibition. *J. Bacteriol.* 172, 3318-3327.

761 Baumgardt K, Šmídová K, Rahn H, Lochnit G, Robledo M, Evguenieva-Hackenberg E (2016) The  
762 stress-related, rhizobial small RNA RcsR1 destabilizes the autoinducer synthase encoding mRNA *sinI*  
763 in *Sinorhizobium meliloti*. *RNA Biol.*, 13, 486-499.

764 Benson DA, Cavanaugh M, Clark K, Karsch-Mizrachi I, Lipman DJ, Ostell J, Sayers EW (2013)  
765 GenBank. *Nucleic Acids Res.* 41, D36-42.

766 Bonn F, Bartel J, Büttner K, Hecker M, Otto A, Becher D (2014). Picking vanished proteins from the  
767 void: how to collect and ship/share extremely dilute proteins in a reproducible and highly efficient  
768 manner. *Anal. Chem.* 86, 7421–7427.

- 769 Bustin SA, Benes V, Garson JA, Hellems J, Huggett J, Kubista M, Mueller R, Nolan T, Pfaffl MW,  
770 Shipley GL, Vandesompele J, Wittwer CT (2009) The MIQE guidelines: minimum information for  
771 publication of quantitative real-time PCR experiments. *Clin. Chem.* 55, 611-622.
- 772 Cabrera-Quio LE, Herberg S, Pauli A (2016) Decoding sORF translation - from small proteins to gene  
773 regulation. *RNA Biol.* 13, 1051-1059.
- 774 Chadani Y, Niwa T, Izumi T, Sugata N, Nagao A, Suzuki T, Chiba S, Ito K, Taguchi H (2017) Intrinsic  
775 Ribosome Destabilization Underlies Translation and Provides an Organism with a Strategy of  
776 Environmental Sensing. *Mol. Cell* 68, 528-539.e5.
- 777 Chopra I, Roberts M (2001) Tetracycline antibiotics: mode of action, applications, molecular biology,  
778 and epidemiology of bacterial resistance. *Microbiol. Mol. Biol. Rev.* 65, 232-260.
- 779 Crooks GE, Hon G, Chandonia JM, Brenner SE (2004) WebLogo: A sequence logo generator. *Genome*  
780 *Research*, 14, 1188-1190.
- 781 Dar D, Shamir M, Mellin JR, Koutero M, Stern-Ginossar N, Cossart P, Sorek R (2016) Term-seq reveals  
782 abundant ribo-regulation of antibiotics resistance in bacteria. *Science* 352, aad9822.
- 783 DebRoy S, Gebbie M, Ramesh A, Goodson JR, Cruz MR, van Hoof A, Winkler WC, Garsin DA. (2014)  
784 Riboswitches. A riboswitch-containing sRNA controls gene expression by sequestration of a response  
785 regulator. *Science* 345, 937-940.
- 786 Edgar RC (2004) MUSCLE: multiple sequence alignment with high accuracy and high throughput.  
787 *Nucleic Acids Res.* 32, 1792-1797.
- 788 Edgar R, Domrachev M, Lash AE (2002) Gene Expression Omnibus: NCBI gene expression and  
789 hybridization array data repository. *Nucleic Acids Res.* 30, 207-210.
- 790 Feng L, Rutherford ST, Papenfort K, Bagert JD, van Kessel JC, Tirrell DA, Wingreen NS, Bassler BL.  
791 (2015) A qrr noncoding RNA deploys four different regulatory mechanisms to optimize quorum-sensing  
792 dynamics. *Cell* 160, 228-240.
- 793 Fischer HM, Babst M, Kaspar T, Acuña G, Arigoni F, Hennecke H (1993) One member of a gro-ESL-  
794 like chaperonin multigene family in *Bradyrhizobium japonicum* is co-regulated with symbiotic nitrogen  
795 fixation genes. *EMBO J.* 12, 2901-2912.
- 796 Gaballa A, Antelmann H, Aguilar C, Khakh S, Song KB, Smaldone GT, Helmann JD (2008) The *Bacillus*  
797 *subtilis* iron-sparing response is mediated by a Fur-regulated small RNA and three small, basic proteins.  
798 *Proc. Natl. Acad. Sci. U. S. A.* 105, 11927-11932.
- 799 Galibert F, Finan TM, Long SR, Puhler A, Abola P, Ampe F, et al. (2001) The composite genome of the  
800 legume symbiont *Sinorhizobium meliloti*. *Science* 293:668-672.
- 801 Hillen W, Berens C (1994) Mechanisms underlying expression of Tn10 encoded tetracycline resistance.  
802 *Annu. Rev. Microbiol.* 48, 345-69.
- 803 Johnston AW, Bibb MJ Beringer JE (1978) Tryptophan genes in Rhizobium - their organization and their  
804 transfer to other bacterial genera. *Mol. Gen. Genet.* 165, 323-330.

- 805 Hahn J, Tsoy OV, Thalmann S, Čuklina J, Gelfand MS, Evgenieva-Hackenberg E (2016) Small Open  
806 Reading Frames, Non-Coding RNAs and Repetitive Elements in *Bradyrhizobium japonicum* USDA 110.  
807 PLoS One 11:e0165429.
- 808 Hyatt D, Chen G-L, Locascio PF, Land ML, Larimer FW, Hauser LJ. (2010) Prodigal: prokaryotic gene  
809 recognition and translation initiation site identification. BMC Bioinformatics 11, 119.
- 810 Khan SR, Gaines J, Roop RM 2<sup>nd</sup>, Farrand SK (2008) Broad-host-range expression vectors with tightly  
811 regulated promoters and their use to examine the influence of TraR and TraM expression on Ti plasmid  
812 quorum sensing. Appl. Environ. Microbiol. 74, 5053-5062.
- 813 Kondo T, Hashimoto Y, Kato K, Inagaki S, Hayashi S, Kageyama Y (2007) Small peptide regulators of  
814 actin-based cell morphogenesis encoded by a polycistronic mRNA. Nat. Cell. Biol. 9, 660–665.
- 815 Lau CH, Fraud S, Jones M, Peterson SN, Poole K (2012) Reduced expression of the *rplU-rpmA*  
816 ribosomal protein operon in *mexXY*-expressing pan-aminoglycoside-resistant mutants of *Pseudomonas*  
817 *aeruginosa*. Antimicrob. Agents. Chemother. 56, 5171-5179.
- 818 Loh E, Dussurget O, Gripenland J, Vaitkevicius K, Tiensuu T, Mandin P, Repoila F, Buchrieser C,  
819 Cossart P, Johansson J (2009) A *trans*-acting riboswitch controls expression of the virulence regulator  
820 PrfA in *Listeria monocytogenes*. Cell 139,770-779.
- 821 MacLean B, Tomazela DM, Shulman N, Chambers M, Finney GL, Frewen B, Kern R, Tabb DL, Liebler  
822 DC, MacCoss MJ (2010). Skyline: an open source document editor for creating and analyzing targeted  
823 proteomics experiments. Bioinformatics 26, 966–968.
- 824 Maguire BA, Beniaminov AD, Ramu H, Mankin AS, Zimmermann RA (2005) A protein component at the  
825 heart of an RNA machine: the importance of protein L27 for the function of the bacterial ribosome. Mol.  
826 Cell 20, 427-435.
- 827 Maechler M, Rousseeuw P, Struyf A, Hubert M, Hornik K (2018). cluster: Cluster Analysis Basics and  
828 Extensions. R package version 2.0.7-1.
- 829 Mank NN, Berghoff BA, Hermanns YN, Klug G (2012) Regulation of bacterial photosynthesis genes by  
830 the small noncoding RNA PcrZ. Proc. Natl. Acad. Sci. U. S. A. 109, 16306-11631.
- 831 Mann M, Wright PR, Backofen R (2017) IntaRNA 2.0: enhanced and customizable prediction of RNA-  
832 RNA interactions. Nucleic Acids Res. 45(W1):W435-W439.
- 833 Mellin JR, Koutero M, Dar D, Nahori MA, Sorek R, Cossart P. (2014) Riboswitches. Sequestration of a  
834 two-component response regulator by a riboswitch-regulated noncoding RNA. Science 345, 940-943.
- 835 Mesa S, Hauser F, Friberg M, Malaguti E, Fischer HM, Hennecke H (2008) Comprehensive assessment  
836 of the regulons controlled by the FixLJ-FixK2-FixK1 cascade in *Bradyrhizobium japonicum*. J Bacteriol.  
837 190, 6568-79.
- 838 McIntosh M, Krol E, Becker A (2008) Competitive and Cooperative Effects in Quorum-Sensing-  
839 Regulated Galactoglucan Biosynthesis in *Sinorhizobium meliloti*. J. Bacteriol. 190, 5308-5317.

- 840 Melior H, Li S, Madhugiri R, Stötzel M, Azarderakhsh S, Barth-Weber S, Baumgardt K, Ziebuhr J,  
841 Evguenieva-Hackenberg E (2019) Transcription attenuation-derived small RNA rTrpL regulates  
842 tryptophan biosynthesis gene expression in *trans*. *Nucleic Acids Res* 47, 6396-6410.
- 843 Merino E, Jensen RA, Yanofsky C. (2008) Evolution of bacterial *trp* operons and their regulation. *Curr.*  
844 *Opin. Microbiol.* 11, 78-86.
- 845 Murtagh F, Legendre P (2014) Ward's hierarchical agglomerative clustering method: which algorithms  
846 implement Ward's criterion? *Journal of Classification* 31, 274-295.
- 847 Nelson ML, Levy SB (2011) The history of the tetracyclines. *Ann. N. Y. Acad. Sci.* 1241, 17-32.
- 848 Naamala J, Jaiswal SK, Dakora FD. (2016) Antibiotics Resistance in Rhizobium: Type, Process,  
849 Mechanism and Benefit for Agriculture. *Curr. Microbiol.* 72, 804-816.
- 850 Omasits U, Varadarajan AR, Schmid M, Goetze S, Melidis D, Bourqui M, Nikolayeva O, Québatte M,  
851 Patrignani A, Dehio C, Frey JE, Robinson MD, Wollscheid B, Ahrens CH (2017) An integrative strategy  
852 to identify the entire protein coding potential of prokaryotic genomes by proteogenomics. *Genome Res.*  
853 27, 2083-2095.
- 854 Park SY, Cromie MJ, Lee EJ, Groisman EA (2010) A bacterial mRNA leader that employs different  
855 mechanisms to sense disparate intracellular signals. *Cell* 142, 737-748.
- 856 Pfaffl MW (2001) A new mathematical model for relative quantification in real-time RT-PCR. *Nucleic*  
857 *Acids Res.* 29, e45.
- 858 Reichheld SE, Yu Z, Davidson AR. (2009) The induction of folding cooperativity by ligand binding drives  
859 the allosteric response of tetracycline repressor. *Proc Natl Acad Sci U S A.* 106, 22263-22268.
- 860 Rossmann FM, Rick T, Mrusek D, Sprankel L, Dörrich AK, Leonhard T, Bubendorfer S, Kaefer V, Bange  
861 G, Thormann KM (2019) The GGDEF Domain of the Phosphodiesterase PdeB in *Shewanella*  
862 *putrefaciens* Mediates Recruitment by the Polar Landmark Protein HubP. *J Bacteriol.* 201, pii: e00534-  
863 18.
- 864 Sambrook J, Fritsch EF, Maniatis T (1989) *Molecular cloning: A laboratory manual.* 2. Cold Spring  
865 Harbor Laboratory Press, Cold Spring Harbor, NY.
- 866 Santiago-Frangos A, Woodson SA (2018) Hfq chaperone brings speed dating to bacterial sRNA. *Wiley*  
867 *Interdiscip. Rev. RNA* 9, e1475.
- 868 Schägger H (2006) Tricine-SDS-PAGE. *Nat. Protoc.* 1, 16-22.
- 869 Schlüter JP, Reinkensmeier J, Barnett MJ, Lang C, Krol E, Giegerich R, Long SR, Becker A (2013)  
870 Global mapping of transcription start sites and promoter motifs in the symbiotic  $\alpha$ -proteobacterium  
871 *Sinorhizobium meliloti* 1021. *BMC Genomics* 14, 156.
- 872 Schlüter JP, Czuppon P, Schauer O, Pfaffelhuber P, McIntosh M, Becker A (2015) Classification of  
873 phenotypic subpopulations in isogenic bacterial cultures by triple promoter probing at single cell level.  
874 *J. Biotechnol.* 198, 3-14.



- 875 Sharma CM, Hoffmann S, Darfeuille F, Reignier J, Findeiss S, Sittka A, Chabas S, Reiche K,  
876 Hackermüller J, Reinhardt R, Stadler PF, Vogel J. (2010) The primary transcriptome of the major human  
877 pathogen *Helicobacter pylori*. *Nature* 464, 250-255.
- 878 Singhal P, Jayaram B, Dixit SB, Beveridge DL (2008) Prokaryotic gene finding based on  
879 physicochemical characteristics of codons calculated from molecular dynamics simulations. *Biophys.*  
880 *J.* 94, 4173–4183.
- 881 Simon R, Priefer U, Pühler A (1983) A broad host range mobilization system for *in vivo* genetic  
882 engineering: transposon mutagenesis in Gram negative bacteria. *Bio-Technology* 1, 784-791.
- 883 Smirnov A, Förstner KU, Holmqvist E, Otto A, Günster R, Becher D, Reinhardt R, Vogel J. (2016) Grad-  
884 seq guides the discovery of ProQ as a major small RNA-binding protein. *Proc Natl Acad Sci U S A.* 113,  
885 11591-11596.
- 886 Storz G, Vogel J, Wassarman KM. (2011) Regulation by small RNAs in bacteria: expanding frontiers.  
887 *Mol. Cell* 43, 880-891.
- 888 Storz G, Wolf YI, Ramamurthi KS (2014) Small proteins can no longer be ignored. *Annu. Rev. Biochem.*  
889 83, 753-777.
- 890 Tatusova T, DiCuccio M, Badretdin A, Chetvernin V, Nawrocki EP, Zaslavsky L, Lomsadze A, Pruitt KD,  
891 Borodovsky M, Ostell J. (2016) NCBI prokaryotic genome annotation pipeline. *Nucleic Acids Res.* 44,  
892 6614–6624.
- 893 Untergasser A, Cutcutache I, Koressaar T, Ye J, Faircloth BC, Remm M, Rozen SG (2012) Primer3 -  
894 new capabilities and interfaces. *Nucleic Acids Res.* 40, e115.
- 895 Vallenet D, Belda E, Calteau A, Cruveiller S, Engelen S, Lajus A, Le Fèvre F, Longin C, Mornico D,  
896 Roche D, Rouy Z, Salvignol G, Scarpelli C, Thil Smith AA, Weiman M, Médigue C (2013) MicroScope—  
897 an integrated microbial resource for the curation and comparative analysis of genomic and metabolic  
898 data. *Nucleic Acids Res.* 41, D636–D647.
- 899 Vizcaíno JA, Csordas A, del-Toro N, Dianas JA, Griss J, Lavidas I, Mayer G, Perez-Riverol Y, Reisinger  
900 F, Ternent T, Xu QW, Wang R, Hermjakob H. (2016) 2016 update of the PRIDE database and its related  
901 tools. *Nucleic Acids Res.* 44(D1), D447-56.
- 902 Vitreschak AG, Lyubetskaya EV, Shirshin MA, Gelfand MS, Lyubetsky VA (2004) Attenuation regulation  
903 of amino acid biosynthetic operons in proteobacteria: comparative genomics analysis. *FEMS Microbiol.*  
904 *Lett.*, 234, 357-370.
- 905 Weaver J, Mohammad F, Buskirk AR, Storz G. (2019) Identifying Small Proteins by Ribosome Profiling  
906 with Stalled Initiation Complexes. *MBio.* 10, pii: e02819-18.
- 907 Wickham H (2016) ggplot2: Elegant Graphics for Data Analysis. Springer-Verlag New York.
- 908 Yanofsky C (1981) Attenuation in the control of expression of bacterial operons. *Nature* 289, 751-758.

909 Yin X, Wu Orr M, Wang H, Hobbs EC, Shabalina SA, Storz G (2019) The small protein MgtS and small  
910 RNA MgrR modulate the PitA phosphate symporter to boost intracellular magnesium levels. *Mol.*  
911 *Microbiol.* 111, 131–144.

912 Zuker M (2003) Mfold web server for nucleic acid folding and hybridization prediction. *Nucleic Acids*  
913 *Res.* 31, 3406-3415.

914 Zurawski G, Elseviers D, Stauffer GV, Yanofsky C (1978) Translational control of transcription  
915 termination at the attenuator of the *Escherichia coli* tryptophan operon. *Proc. Natl. Acad. Sci. U. S A.*  
916 75, 5988-92.

917 Zybailov B, Mosley AL, Sardi ME, Coleman MK, Florens L, Washburn MP (2006). Statistical analysis  
918 of membrane proteome expression changes in *Saccharomyces cerevisiae*. *Journal of proteome*  
919 *research* 5, 2339–2347.

920

921 **Supplementary Files**

922 Supplementary Methods

923 Supplementary Figures

924 Table S1, Mass spectrometry results for the 13 kDa band co-purified with MS2-rnTrpL.

925 Table S2, List of putative peTrpL sequences of Rhizobiales members.

926 Table S3, Oligonucleotides used in this work.

927 Table S4, Plasmids used in this work.

928 Table S5, Mass spectrometry data for the quantified peTrpL peptide in both isotope forms.

929

930

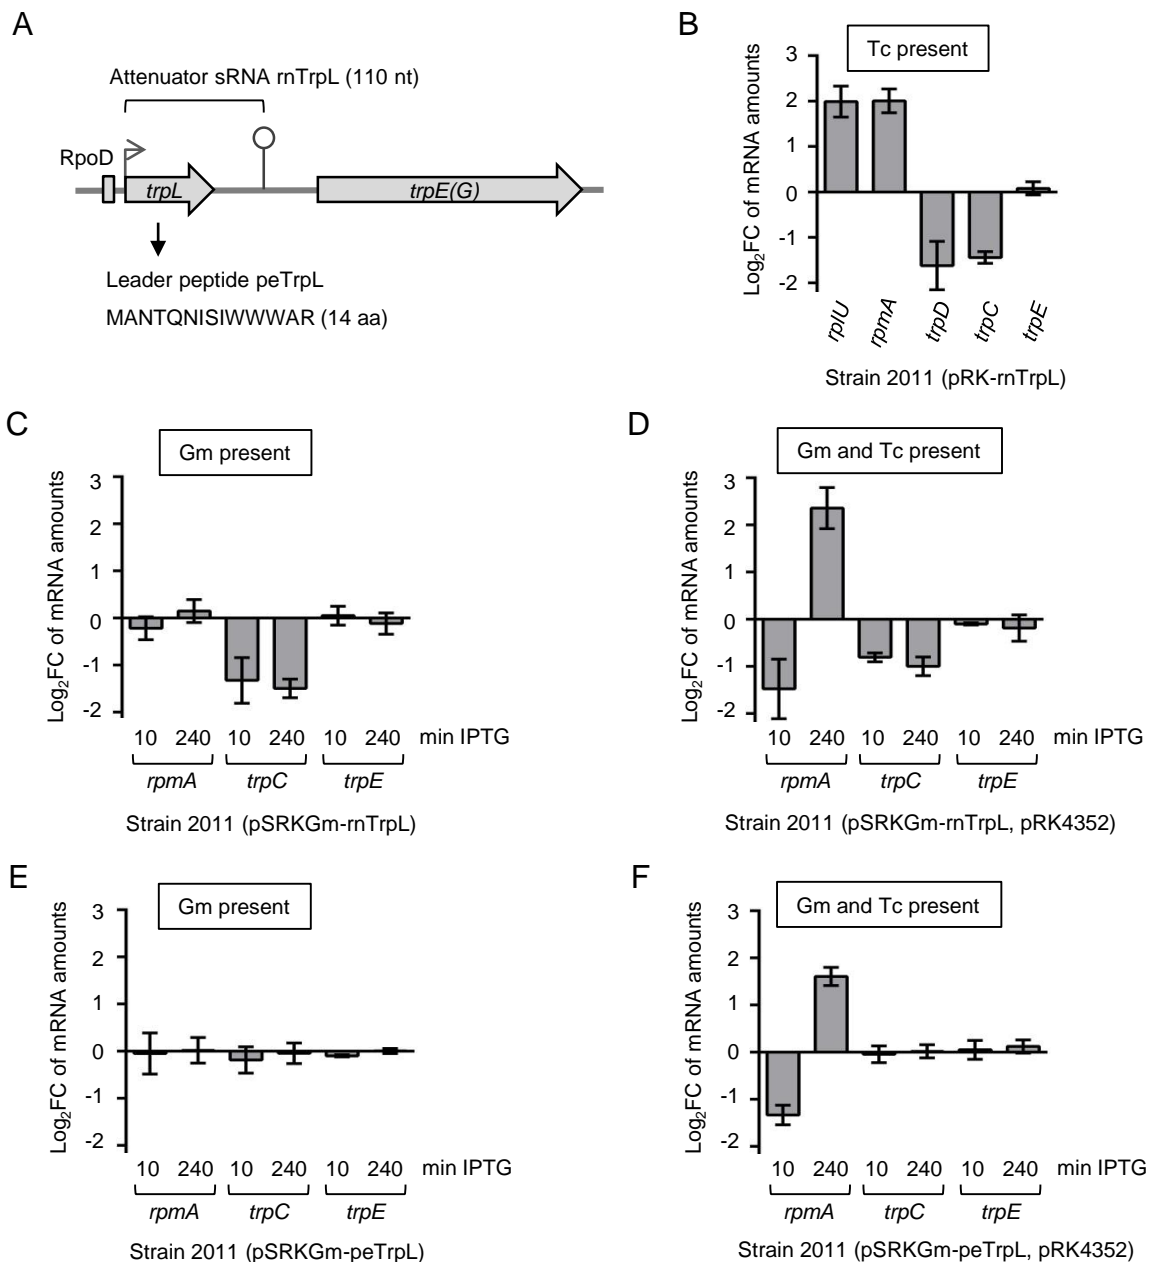

**Figure 1. Induced, short-term overproduction of the leader peptide peTrpL decreases the *rplU*/*rpmA* mRNA level in *S. meliloti* 2011.** **A)** Schematic representation of the *trpLE(G)* locus. The *trpL* and *trpE(G)* ORFs (gray arrows), a RpoD-like promoter (rectangle), the transcription start site (flexed arrow) and the transcription terminator (hairpin) are depicted (according to Bae and Crawford, 1990). **B) to F)** Log<sub>2</sub> fold changes (log<sub>2</sub>FC) in mRNA levels determined by qRT-PCR. Each graph contains data from three independent experiments, each performed in duplicates (shown are means and standard deviations). In each panel, used overexpression strain and presence of selecting antibiotics in the growth media are indicated. **B)** Changes in the levels of the indicated mRNAs in the constitutively overexpressing strain 2011 (pRK-rnTrpL), in comparison to the EVC 2011 (pRK4352). **C)** and **D)** Changes in the levels of the indicated mRNAs upon induction of rnTrpL overproduction. The sRNA rnTrpL encodes the peptide peTrpL. **E)** and **F)** Changes in the levels of the indicated mRNAs upon induction of peTrpL overproduction only. Induction time (min IPTG) is indicated.

A

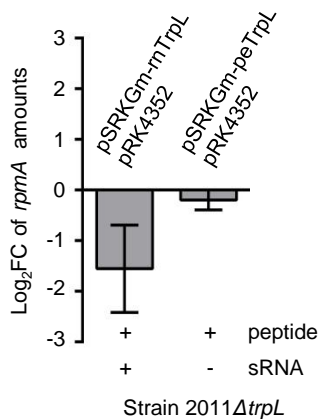

B

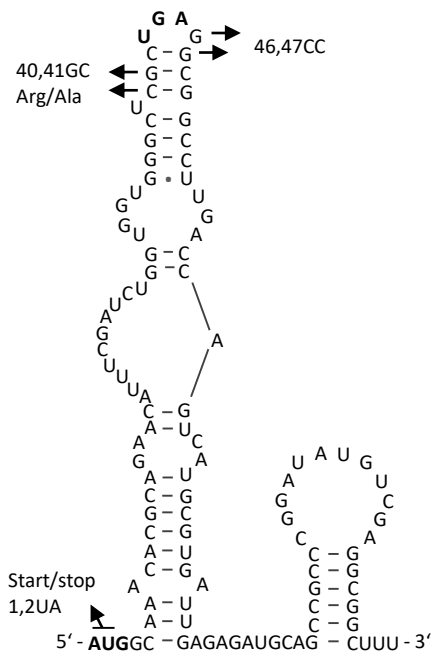

C

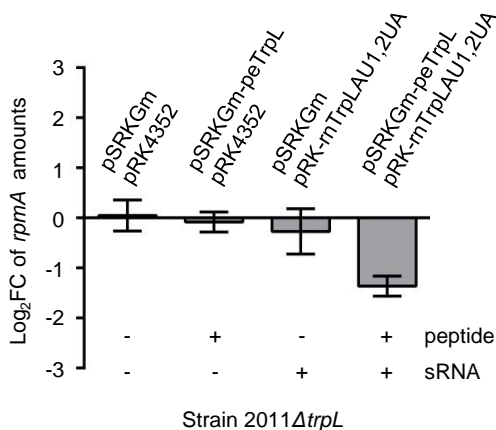

**Figure 2. Both peTrpL and rnTrpL are required for *rplUrpmA* downregulation.**

**A)** and **C)** Cultures of the deletion mutant 2011 $\Delta$ *trpL* containing the indicated plasmids and grown with Gm and Tc were analyzed. Changes in the *rpmA* levels 10 min post addition of IPTG were compared to those before IPTG addition using qRT-PCR. Relevant plasmid products (sRNA and peptide) are indicated below the graphs. Each graph contains data from three independent experiments, each performed in duplicates (shown are means and standard deviations). **B)** Secondary structure of rnTrpL (according to Melior et al., 2019) with indicated mutations used in this work. The rnTrpL derivative with start codon of the *trpL* sORF exchanged for a stop codon (harbors an inactivated *trpL* sORF and exhibits the sRNA functions only) was constitutively overproduced from plasmid pRK-rnTrpL-AU1,2UA.

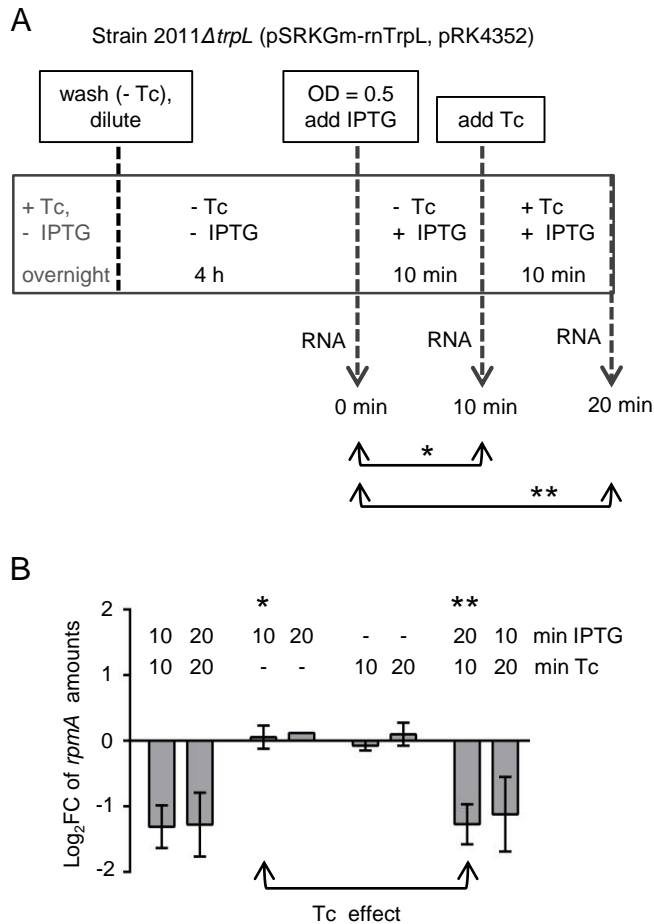

**Figure 3. Tetracycline is also required for downregulation of *rplUrpmA* by rnTrpL and peTrpL.** **A)** Schematic representation of the experiment aiming to detect a short-term effect of Tc on *rplUrpmA* expression in strain 2011 $\Delta trpL$  (pSRKGm-rnTrpL, pRK4352). The culture was grown first in medium with Gm and Tc. Then, the strain was grown for 4 h without Tc, IPTG was added and, 10 min later, Tc was also added. RNA was isolated at the indicated time points. The *rpmA* levels at the time points 10 and 20 min were compared to the level at the time point 0 (marked with arrows and asterisks). **B)** qRT-PCR analysis of changes in the *rpmA* level upon induction of lacZ'-rnTrpL transcription with IPTG and/or exposure to Tc. In addition to the culture treatment depicted in panel A, suitable controls were conducted: cultures were exposed to IPTG only, Tc only or to a combination of both compounds for the indicated times (min). Bars representing the comparisons of the *rpmA* levels at time point 10 min (one asterisk) and 20 min (two asterisks) to the level at time point 0 min (see panel A) are indicated. Their difference indicates a Tc effect on *rplUrpmA* expression. Shown are means and standard deviations from three independent experiments, each performed in duplicates.

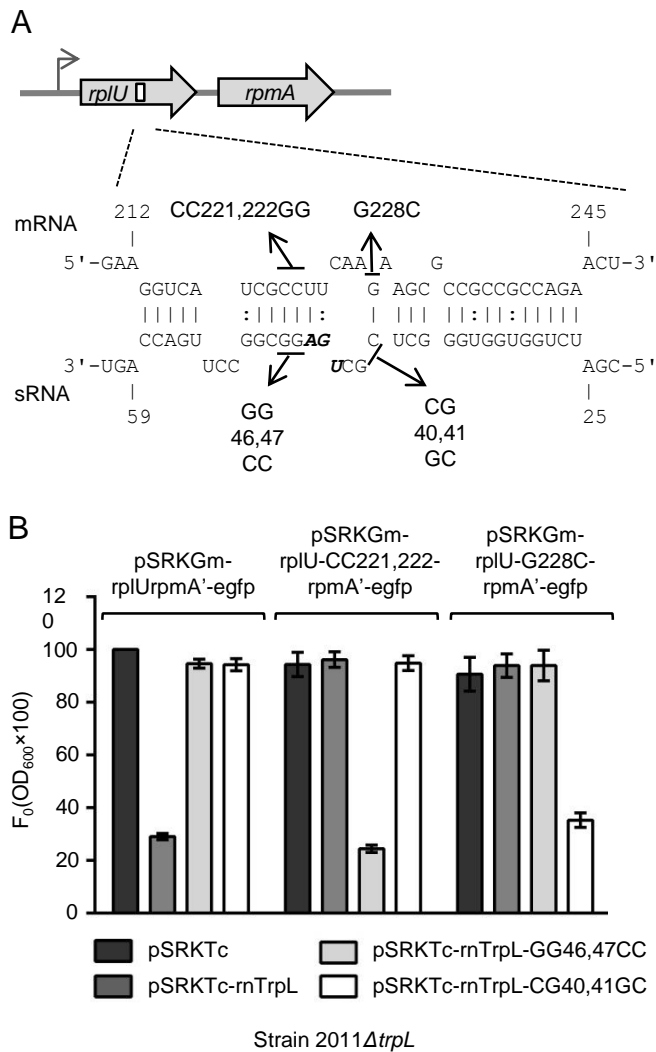

**Figure 4. rnTrpL directly base-pairs with *rplU* to downregulate *rplUrpmA*.**

**A)** Scheme of the *rplUrpmA* operon and the duplex structure predicted to be formed between *rplU* (mRNA) and rnTrpL (sRNA) ( $\Delta G = -11.54$  kcal/mol). The transcription start site is indicated by a flexed arrow (Schlüter et al., 2013). The used mutations in lacZ'-rnTrpL and compensatory mutations in *rplU* are given.

**B)** Analysis of possible base-pairing interactions between lacZ'-rnTrpL and the fusion mRNA *rplUrpmA'*::*egfp* in strain 211 $\Delta$ *trpL*. The plasmids used in this experiment are indicated. Cultures were grown with Gm and Tc, and fluorescence was measured 20 min after IPTG addition. The fluorescence of strain 211 $\Delta$ *trpL* (pSRKGM-*rplUrpmA'*-*egfp*, pSRKTc) was set to 100 % and used for normalization. Shown are means and standard deviations from three independent experiments, each performed in duplicates.

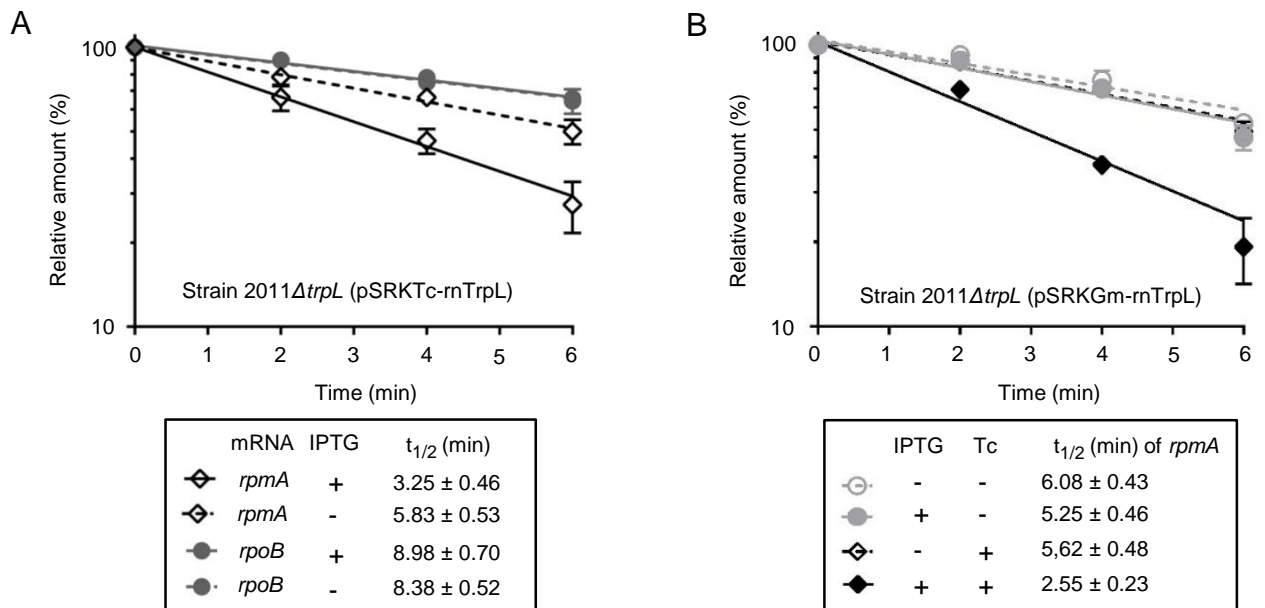

**Figure 5. Induced rnTrpL production destabilizes *rplUrpmA* mRNA in a Tc-dependent manner.** **A)** Half-lives of *rpmA* and (as a negative control) *rpoB* mRNA in strain 2011 $\Delta$ *trpL* (pSRKTc-rnTrpL) grown with Tc. 10 min after induction of lacZ'-rnTrpL production by IPTG, rifampicin (Rf) was added to stop cellular transcription. In parallel, a non-induced culture was treated with Rf. The mRNA level at time point 0 (before Rf addition) was set to 100%, the relative mRNA level values were plotted against the time, and the mRNA half-lives were calculated. Shown are the results from three independent transcription inhibition experiments. The qRT-PCRs reactions were performed in technical duplicates (means with standard deviations are indicated). **B)** Half-lives of *rpmA* in strain 2011 $\Delta$ *trpL* (pSRKGm-rnTrpL) grown with Gm and exposed to a subinhibitory Tc concentration (1.5  $\mu$ g/ml) for 10 min. A culture was split in four portions, which were treated differently in respect to IPTG and Tc addition (indicated). For other descriptions see A). The *rplU* half-lives are shown in Fig. S3.

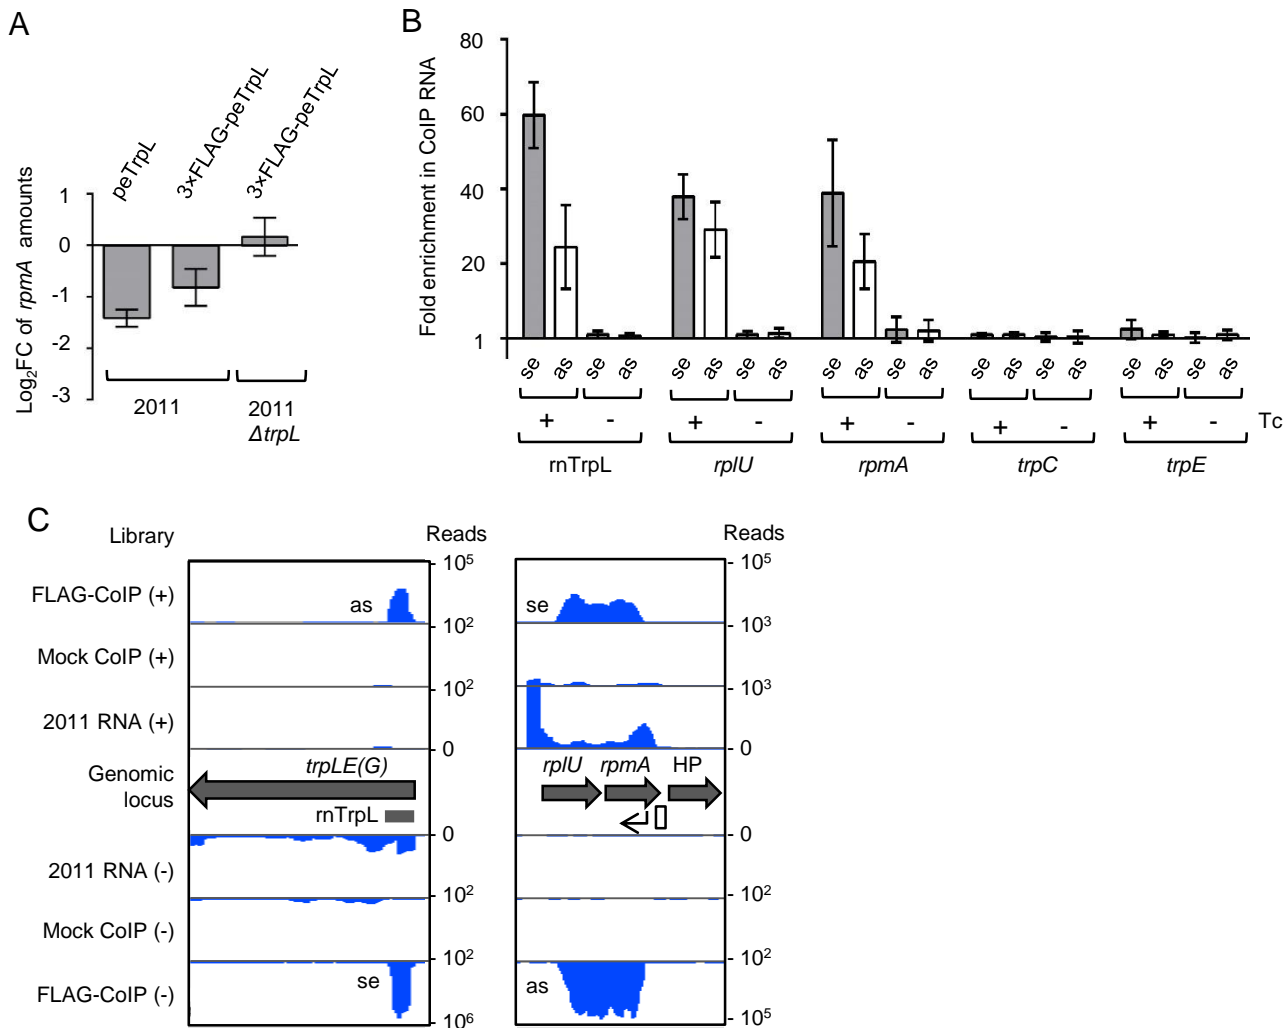

**Figure 6. Coimmunoprecipitation with 3xFLAG-peTrpL reveals a Tc-dependent complex containing**

**rnTrpL, *rplU*, *rpmA* and antisense RNAs.** **A)** Induced production of 3xFLAG-peTrpL down-regulates *rplU* and *rpmA* in strain 2011 but not in the deletion mutant 2011 $\Delta trpL$ . Cultures of strains 2011 (pSRKGm-peTrpL, pRK4352), 2011 (pSRKGm-3xFLAG-peTrpL, pRK4352), and 2011 $\Delta trpL$  (pSRKGm-3xFLAG-peTrpL, pRK4352), respectively, were grown in medium with Gm and Tc (20  $\mu$ g/ml). Shown is a qRT-PCR analysis of changes in *rpmA* levels at 10 min post induction of peTrpL or 3xFLAG-peTrpL as indicated. Shown are means and standard deviations from three independent experiments, each performed in duplicates. **B)** Analysis by qRT-PCR of the indicated RNAs in the 3xFLAG-peTrpL CoIP samples from strain 2011 (pSRKGm-3xFLAG-peTrpL, pRK4352). Enrichment was calculated in comparison to mock CoIPs conducted with strain 2011 (pSRKGm-peTrpL, pRK4352). The presence of Tc in the washing buffer is indicated. se, sense RNA; as, antisense RNA. Shown are the results from three independent CoIP experiments. The qRT-PCR for each experiment was performed in duplicates (means with standard deviations are indicated). **C)** RNA-seq analysis revealed sense (se) and antisense (as) RNA of rnTrpL and *rplU* and *rpmA* in the 3xFLAG-peTrpL CoIP samples. Only RNA retained on the beads after washing with a Tc-containing buffer was sequenced (from the FLAG-CoIP and the mock CoIP), along with total RNA of strain 2011 (2011 RNA) grown under similar conditions, but without Gm and Tc. Shown is an IGB view of mapped cDNA reads. Annotated ORFs (gray arrows) or known transcripts (gray horizontal bar) are indicated (HP, hypothetical protein). An antisense promoter downstream of *rpmA* (white rectangle) and a corresponding transcription start site (flexed arrow) are indicated.



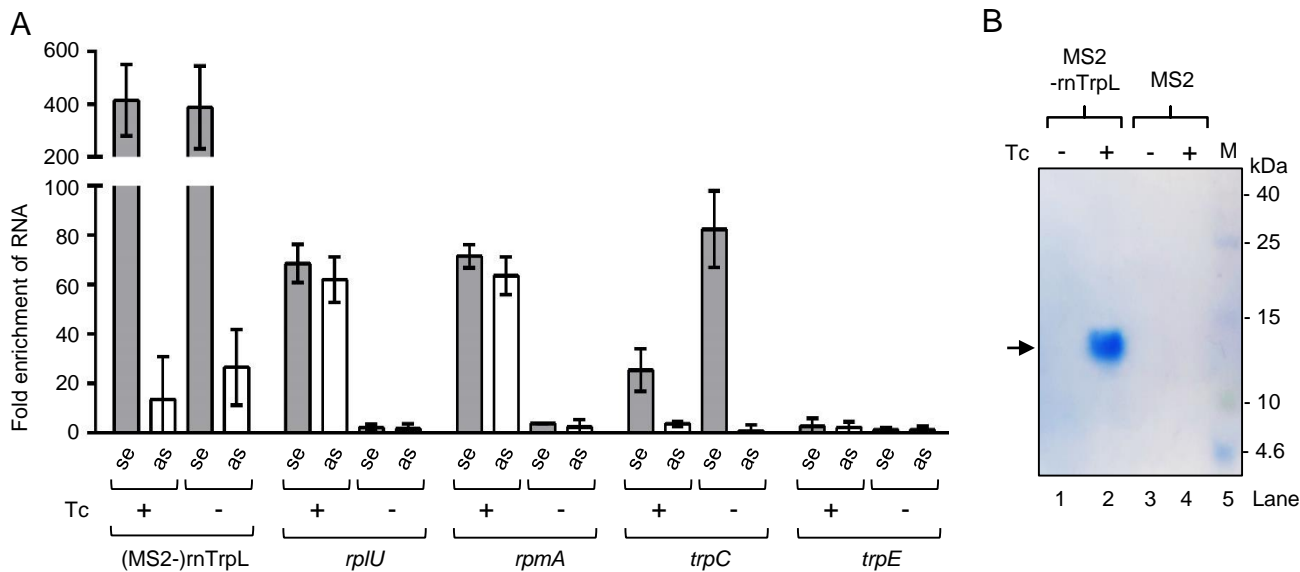

**Figure 7. Affinity purification of MS2-rnTrpL confirms a Tc-dependent ribonucleoprotein complex (ARNP).** **A**) Analysis by qRT-PCR of the indicated RNAs in the elution samples of MS2-MBP affinity chromatography of strain 2011 (pSRKGm-3×FLAG-peTrpL, pRK-MS2-rnTrpL) producing the aptamer-tagged sRNA MS2-rnTrpL. Enrichment was calculated in comparison to the elution samples of similar chromatography of strain 2011 (pSRKGm-3×FLAG-peTrpL, pRK-MS2) producing only the MS2 aptamer. For other descriptions see Fig. 6B. **B**) Tricine-SDS-PAGE analysis of the MS2-rnTrpL and MS2 samples described in A). Migration behavior of protein standards is indicated (in kDa). The 3×FLAG-peTrpL band is marked with an arrow.

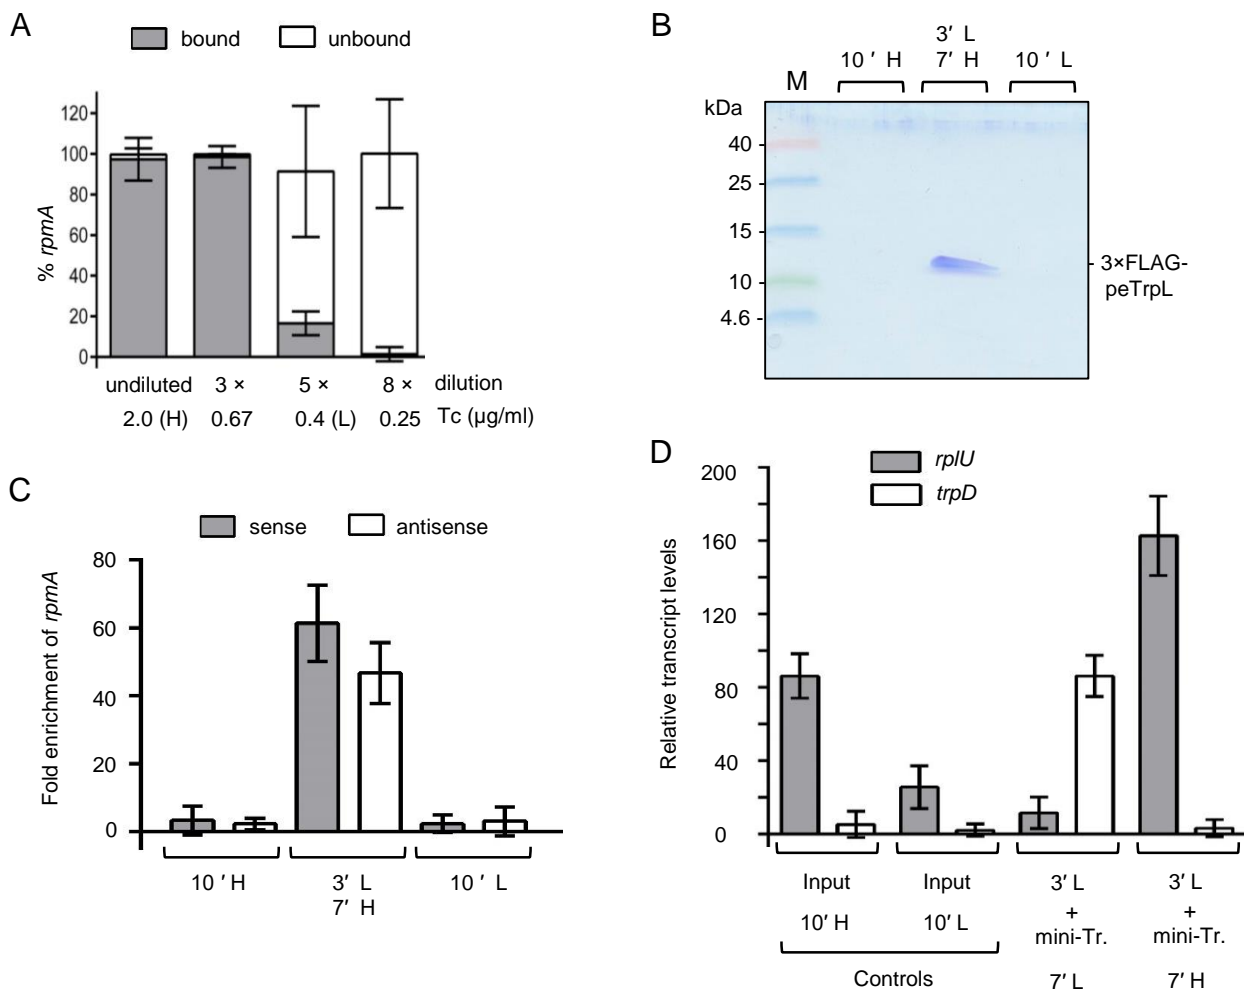

**Figure 8. Increased Tc concentration cause ARNP assembly and redirection of rnTrpL from *trpD* to *rplU*.** ARNP complexes containing only the wild type peTrpL were purified from *S. meliloti* containing pRK-MS2-rnTrpL, eluted in buffer with 2  $\mu\text{g/ml}$  Tc (H, High-Tc), and subjected to dissociation and reassociation. **A)** The eluted ARNP complex was serially diluted with a buffer without Tc as indicated, and then pull-down with MS2-MBP-beads was performed. The supernatant (unbound *rpmA*) and pellet (*rpmA* bound to MS2-rnTrpL) were compared by qRT-PCR. The complex largely dissociates at 0.4  $\mu\text{g/ml}$  Tc (L, Low-Tc). For **B)** and **C)**, the eluted ARNP complex was amended with synthetic 3xFLAG-peTrpL and divided in three portions that were treated differently: 1) 10' H, the sample was incubated for 10 min at High-Tc. 2) 3' L, 7' H, the sample was diluted 5x in buffer without Tc and incubated for 3 min at Low-Tc; then the Tc concentration was raised and the sample was incubated for 7 min at High-Tc. 3) 10' L, the sample was diluted 5x in buffer without Tc and incubated for 3 min at Low-Tc; then corresponding volume of ethanol (Tc solvent) was added, without raising the Tc concentration, and the sample was incubated for additional 7 min at Low-Tc. **B)** The treated samples were subjected to MS2-MBP affinity chromatography and the elution fractions were analyzed by Tricine-SDS-PAGE. A representative Coomassie stained gel is shown. **C)** The treated samples were subjected to CoIP with FLAG-specific antibodies and coimmunoprecipitated RNA was analyzed by qRT-PCR with *rpmA* specific primers. **D)** To an ARNP sample that was diluted 5x in buffer without Tc, incubated for 3 min, and mini-*rplU* and mini-*trpD* transcripts were added. The sample was split and the one half was kept at Low-Tc, while to the second half Tc was added to achieve High-Tc conditions. After seven minutes, MS2-MBP affinity chromatography was performed and the transcripts co-purified with MS2-rnTrpL were analyzed by qRT-PCR. For details see B) and C). All graphs show are means and standard deviations from three independent experiments, each performed in duplicates.

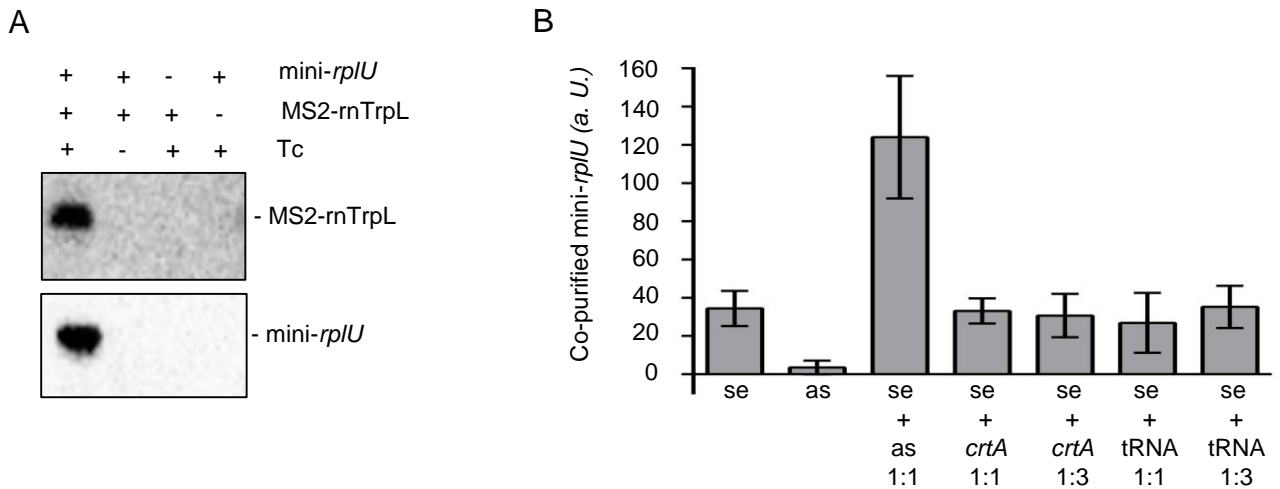

**Figure 9. ARNP reconstitution: core complex and accessory asRNA. A)** 50 ng synthetic peTrpL, 50 ng synthetic 3×FLAG-peTrpL, 100 ng MS2-rnTrpL *in vitro* transcript, 100 ng mini-*rpIU* transcript and 2 μg/ml Tc were used. All 250 μl reaction mixtures contained the peptides. The presence of each of the other components is indicated. After 20 min incubation at 20 °C, CoIP with FLAG-directed antibodies was performed. Presence of Tc in the washing buffer corresponded to the incubation conditions. Coimmunoprecipitated RNA was analyzed by Northern blot hybridization. Detected transcripts are indicated. Results from a representative experiment are shown. **B)** 50 ng synthetic peTrpL, 50 ng synthetic 3×FLAG-peTrpL and 100 ng MS2-rnTrpL *in vitro* transcript per reconstitution reaction (final volume of 50 μl) were mixed in a buffer containing 2 μg/ml Tc. Seven reconstitution reactions were performed in parallel. Addition of 100 ng mini-*rpIU* transcript (se), 100 ng corresponding antisense transcript (as) or both se and as (each 100 ng) in the first three samples is indicated. In the other four samples, unrelated *crtA* *in vitro* transcript (100 ng or 300 ng) or yeast tRNA (100 ng or 300 ng) was added together with the mini-*rpIU* (100 ng). After 20 min incubation at 20 °C, MS2-MBP affinity chromatography was performed. Tc was included in the washing buffer. Relative levels of mini-*rpIU* (se) were determined by qRT-PCR. MS2-rnTrpL was used for normalization. Shown are means and standard deviations from three independent reconstitution experiments. Each qRT-PCR was performed in technical duplicates.

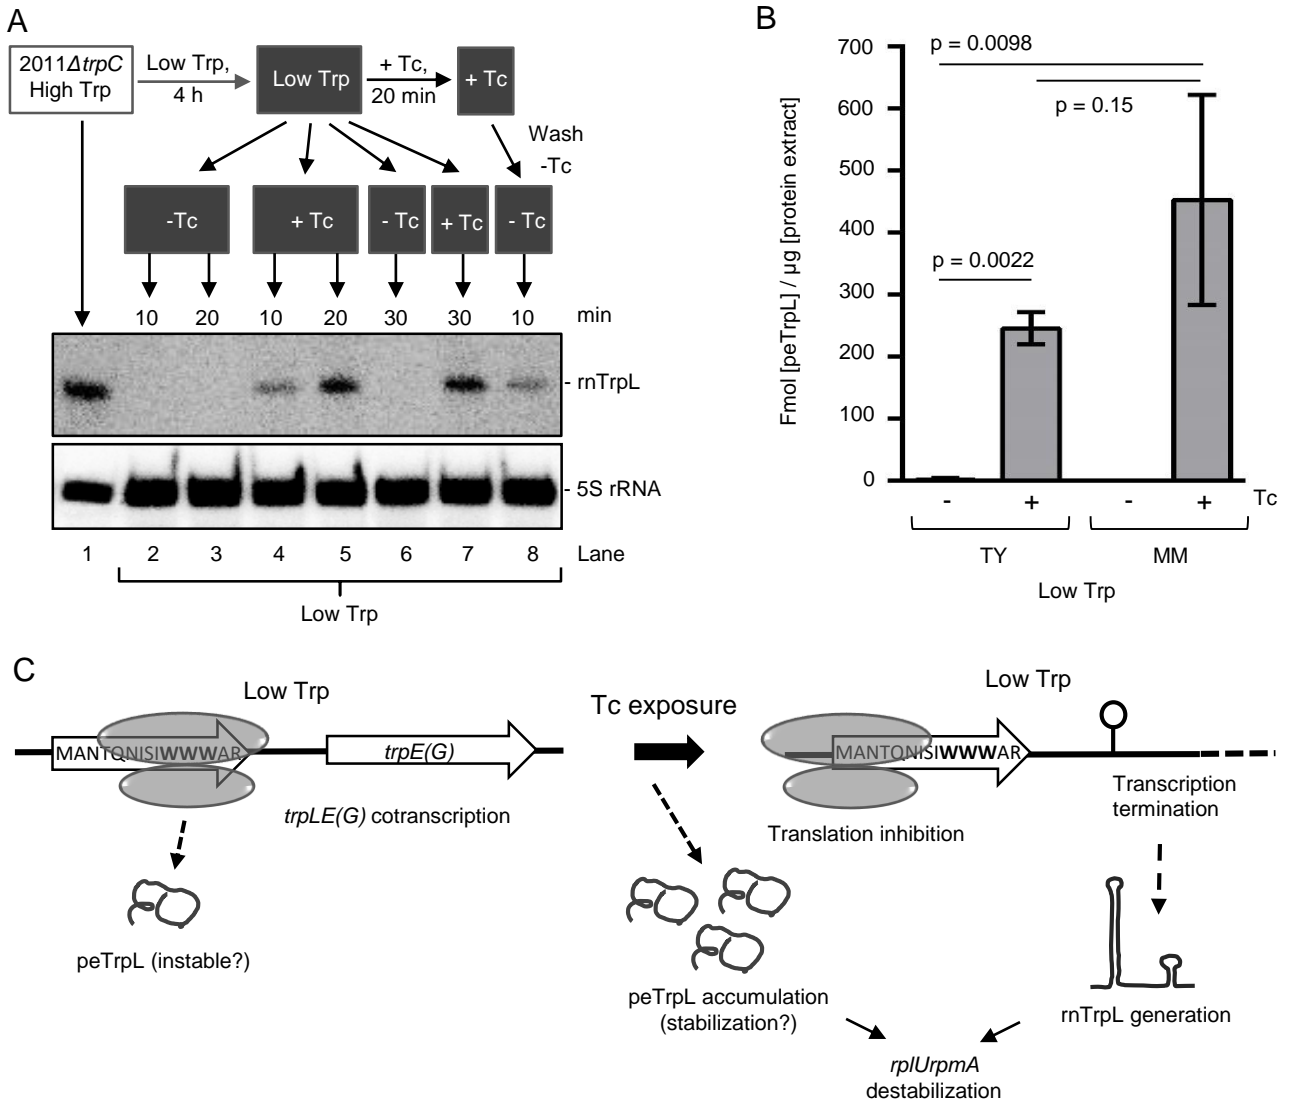

**Figure 10. Generation of rnTrpL and accumulation of peTrpL upon exposure of *S. meliloti* to sub-inhibitory concentration of Tc. A)** Northern blot analysis of strain 2011 $\Delta$ *trpC* shows the generation of rnTrpL under conditions of Trp insufficiency, upon exposure to Tc. Schematic representation of the experiment is shown above the hybridization panels. High Trp conditions, 20  $\mu$ g/ml Trp in the minimal medium (MM); Low Trp conditions, 2  $\mu$ g/ml Trp in the MM. + Tc, Tc was added to a final concentration of 1.5  $\mu$ g/ml. - Tc, corresponding volume of the solvent ethanol was added. 30  $\mu$ g total RNA was loaded in each lane, except for lane 1 in which 10  $\mu$ g RNA was loaded. First, a probe directed against rnTrpL was used and, then, the membrane was re-hybridized with the 5S rRNA-specific probe (loading control). Detected RNAs are indicated. **B)** Mass spectrometry analysis reveals strong accumulation of peTrpL in strain 2011 upon 10 min exposure to Tc (1.5  $\mu$ g/ml). Lysates of cultures grown in rich TY medium or in MM supplemented with 2  $\mu$ g/ml Trp were analyzed. As indicated, the cultures were exposed to Tc or were not exposed (the solvent ethanol only was added). Shown are means and standard deviations from three independent experiments. p-values for students t-tests are given. **C)** Graphic summary of the results shown in A) and B). Under conditions of Trp insufficiency (Low Trp), peTrpL is slowly translated and probably rapidly degraded. Upon exposure to 1.5  $\mu$ g/ml Tc, peTrpL accumulates, probably due to its stabilization. The (partial) translation inhibition by leads to transcription termination between *trpL* and *trpE(G)* and generation of rnTrpL. Thus, even under conditions of Trp shortage, *rplUrpmA* can be downregulated by rnTrpL and peTrpL in response to Tc exposure.

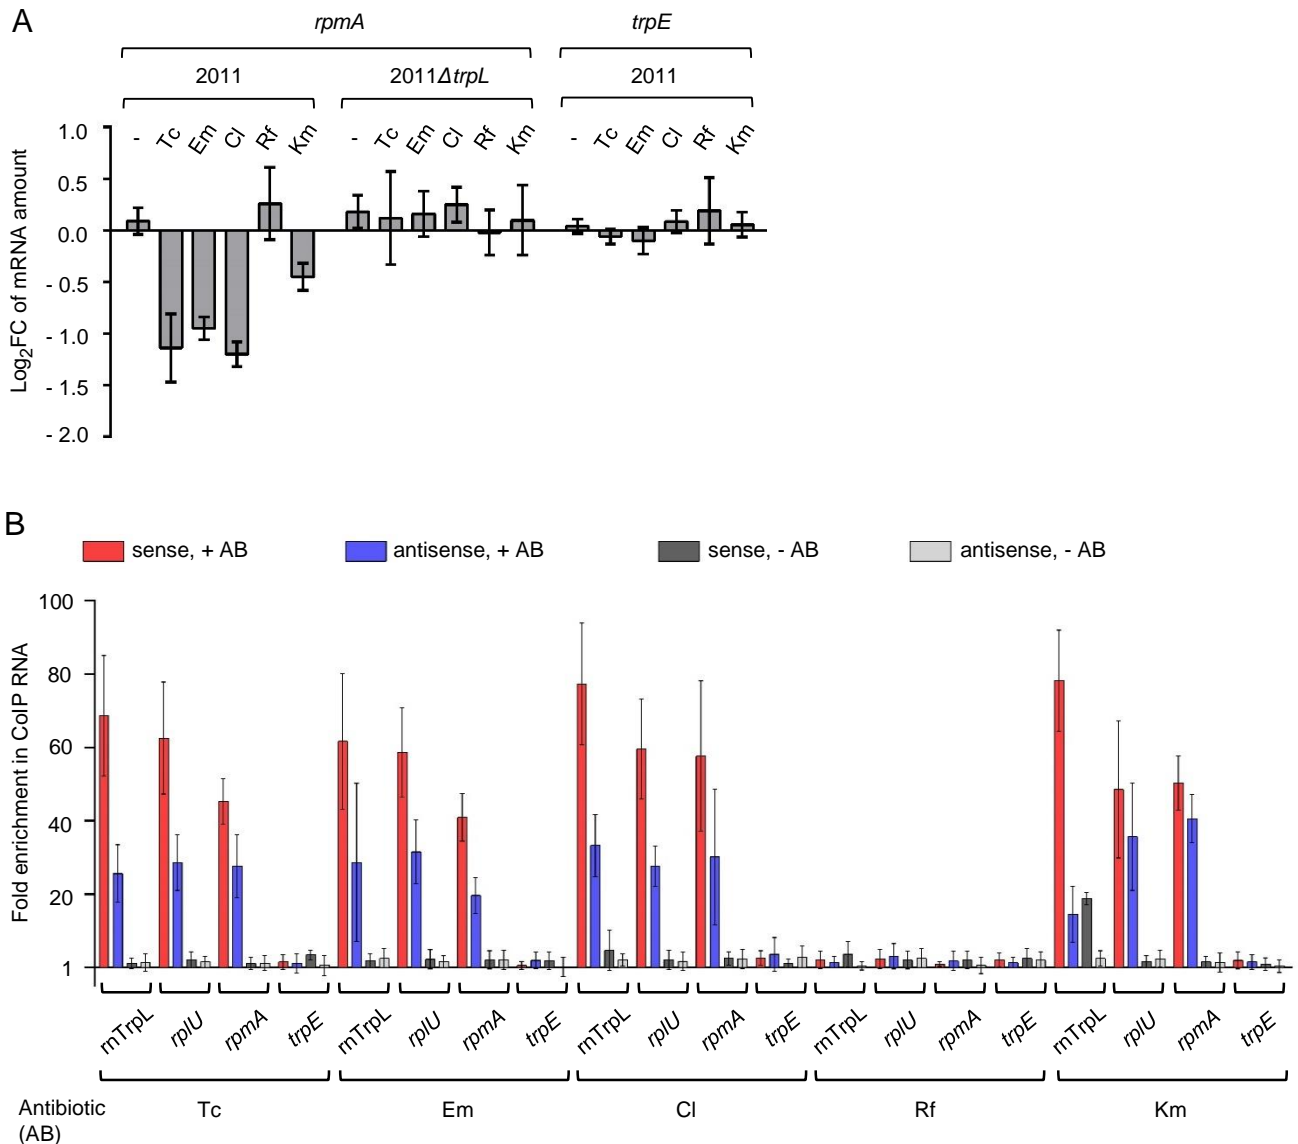

**Figure 11. Several translation-inhibiting antibiotics down-regulate *rplU*/*rpmA* and promote ARNP formation.** **A)** qRT-PCR analysis of changes in the *rpmA* level 10 min after addition of the indicated antibiotics at subinhibitory concentrations to cultures of strain 2011 or 2011Δ*trpL*: 1.5 μg/ml Tc, 27 μg/ml Em, 9 μg/ml Cl, 3 μg/ml Rf, 45 μg/ml Km. *trpE*, negative control. **B)** Enrichment analysis of the indicated RNAs in the 3×FLAG-peTrpL ColP samples from strain 2011 (pSRKGm-3×FLAG-peTrpL), in comparison to the control, mock ColP conducted with strain 2011 (pSRKGm-peTrpL). Bacterial cultures were grown in medium with Gm. ColP was performed 10 min after addition of IPTG and one of the indicated antibiotics (the concentrations are specified in A). The same antibiotic concentration was present in the washing buffer (+ AB), or buffer without antibiotic was used (- AB). Shown are the results from three independent ColP experiments. The qRT-PCR for each experiment was performed in duplicates (means with standard deviations are indicated).

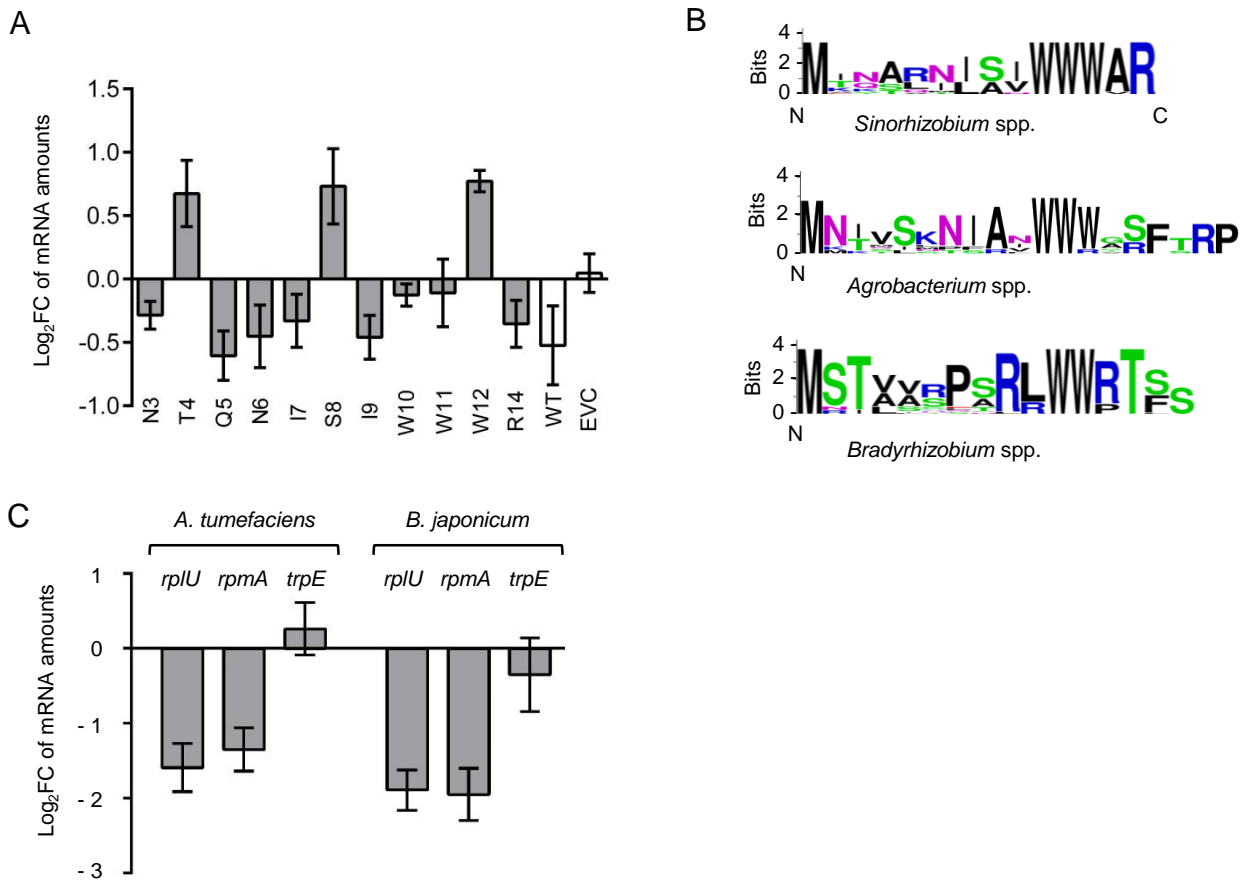

**Figure 12. Role of peTrpL in *rplUrpmA* downregulation is conserved in Rhizobiales despite high divergence in amino acid sequence.** **A)** Alanine scanning mutagenesis for analysis of functionally important residues in peTrpL of *S. meliloti*. Changes in the levels of *rpmA* were determined by qRT-PCR 10 min after addition of IPTG to induce the overproduction of peTrpL variants with the indicated aa exchanges. As EVC, *S. meliloti* 2011 cotransformed with pSRKGm and pRK4352 were used, while the strains used to overproduce wild type peTrpL (or one of its variants with aa exchanges) were cotransformed with pSRKGm-peTrpL (or one of its mutated derivatives) and pRK4352. All cultures were grown with Gm and Tc in the medium. **B)** Sequence logos for peTrpL of the *Sinorhizobium*, *Agrobacterium* and *Bradyrhizobium* groups (see Fig. S9). **C)** qRT-PCR analysis of the indicated mRNAs in *A. tumefaciens* and *B. japonicum* shows a decrease in the *rplUrpmA* mRNA levels upon overproduction of corresponding peTrpL homologs. Plasmid pSRKTc-Atu-peTrpL was used to induce peptide production for 10 min, and mRNA levels after induction were compared to those before induction. Due to the lack of a suitable inducible system for *B. japonicum*, Bja-peTrpL was overproduced constitutively from the chromosomally integrated, Tc-resistance-conferring plasmid pRJ-Bja-rnTrpL.

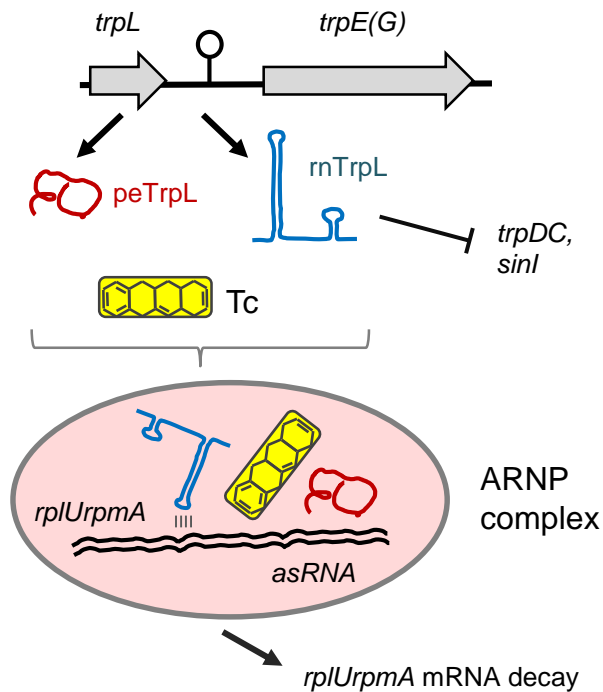

**Figure 13. Model of the peTrpL leader peptide function in ARNP formation and *rplUrpmA* destabilization upon exposure of *S. meliloti* to tetracycline.** The leader peptide and the antibiotic redirect the attenuator sRNA rnTrpL from antibiotic-independent targets such as *trpDC* to *rplUrpmA* mRNA. The asRNA anti-*rplUrpmA*, which is induced upon exposure to Tc and increases the ARNP complex formation, is shown in a duplex with *rplUrpmA* mRNA. Base-pairing between rnTrpL and a specific *rplU* sequence is necessary for *rplUrpmA* destabilization.
