1  
2  
3  
4  
5  
6  
7  
8  
9  
10  
11  
12  
13  
14  
15  
16  
17  
18  
19  
20  
21  
22  
23  
24

# Posttranscriptional regulation of ribosomal and multiresistance genes by the bacterial leader peptide peTrpL

Hendrik Melior<sup>1</sup>, Siqi Li<sup>1</sup>, Maximilian Stötzel<sup>1</sup>, Konrad U. Förstner<sup>2</sup>, Sandra Maaß<sup>3</sup>, Rubina Schütz<sup>1</sup>,  
Saina Azarderakhsh<sup>1</sup>, Susanne Barth-Weber<sup>1</sup>, Aleksei Shevkoplias<sup>4</sup>, Kathrin Baumgardt<sup>1</sup>, Zoe  
Chervontseva<sup>5,6</sup>, John Ziebuhr<sup>7</sup>, Christian H. Ahrens<sup>8</sup>, Elena Evguenieva-Hackenberg<sup>1\*</sup>

<sup>1</sup> Institute of Microbiology and Molecular Biology, University of Giessen, Germany

<sup>2</sup> ZB MED - Information Center for Life Sciences, University of Cologne, Germany

<sup>3</sup> Institute of Microbiology, University of Greifswald, Germany

<sup>4</sup> Laboratory for Marine Benthic Ecology and Hydrobiology, Anichkov Lyceum, St. Petersburg, Russia

<sup>5</sup> Kharkevich Institute for Information Transmission Problems RAS, Moscow, Russia

<sup>6</sup> Center for Life Sciences, Skolkovo Institute of Technology, Moscow, Russia

<sup>7</sup> Institute of Medical Virology, University of Giessen, Germany

<sup>8</sup> Agroscope & SIB Swiss Institute of Bioinformatics, Wädenswil, Switzerland

\* Corresponding Author / Leader contact

Email: [Elena.Evguenieva-Hackenberg@mikro.bio.uni-giessen.de](mailto:Elena.Evguenieva-Hackenberg@mikro.bio.uni-giessen.de)

25

26 **Summary**

27 Ribosome-mediated transcription attenuation in bacteria is an important regulatory mechanism that is  
28 controlled by the translation of a short upstream ORF (uORF). Efficient uORF translation causes  
29 transcription termination downstream of the uORF. The resulting leader peptide and small attenuator  
30 RNA are generally considered nonfunctional. Here, we show that, upon exposure to translation-  
31 inhibiting antibiotics, the leader peptide peTrpL (14 aa) of a *Sinorhizobium meliloti* tryptophan (Trp)  
32 biosynthesis operon acts together with its cognate attenuator RNA rnTrpL to destabilize *rplUrpmA*  
33 mRNA which encodes ribosomal proteins. Under these conditions, rnTrpL is produced independently  
34 of Trp availability by transcription termination at the attenuator. In addition, the peTrpL peptide has an  
35 rnTrpL-independent function in a pathway that is induced by effectors of the TetR-type repressor  
36 SmeR. The peTrpL was found to destabilize *smeR* mRNA, resulting in increased multidrug efflux and  
37 multiresistance. The surprising role of peTrpL in antibiotic-triggered posttranscriptional regulation is  
38 conserved in other bacteria.

39

## 40 Introduction

41 Short upstream open reading frames (uORFs) in mRNA leaders are widespread *cis*-elements of  
42 posttranscriptional gene regulation (Andrews and Rothnagel, 2014; Dar and Sorek, 2017). Functions  
43 of eukaryotic uORFs and/or their translation products include regulation of mRNA stability or  
44 translation initiation of the downstream (main) ORF in *cis* (Cabrera-Quio et al., 2016). Although  
45 approximately half of all eukaryotic mRNAs contain uORFs, only few examples for uORFs encoding  
46 *trans*-acting peptides have been reported (Cabrera-Quio et al., 2016; Kereszt et al., 2018). Since in  
47 bacteria, transcription and translation can be coupled, bacterial uORFs are mainly known for their  
48 ability to regulate transcription termination by ribosome-dependent attenuation (Yanofsky, 1981).  
49 Additionally, bacterial uORF-containing RNA leaders and/or the small proteins (called leader peptides)  
50 encoded by these RNA leaders can regulate in *cis* the translation of downstream ORFs (Lovett and  
51 Rogers, 1996; Park et al., 2017). However, specific functions of the bacterial leader peptides in *trans*  
52 have not been reported.

53 Ribosome-dependent attenuation of transcription termination is best studied in *Escherichia coli*, where  
54 the Trp biosynthesis genes *trpEDCBA* are co-transcribed (Yanofsky, 1981). The 5' mRNA leader  
55 harbors the uORF *trpL*, which contains several consecutive Trp codons. Under conditions of Trp  
56 insufficiency, ribosome pausing at the Trp codons prevents the formation of a transcriptional  
57 terminator downstream of the uORF, thus resulting in co-transcription of *trpL* with the structural *trp*  
58 genes. In contrast, if enough Trp is available, fast translation of the Trp codons causes transcription  
59 termination between *trpL* and *trpE* and, as a result, a small attenuator RNA containing the short ORF  
60 (sORF) *trpL* is released. Generally, the released attenuator RNA and its encoded leader peptide are  
61 considered non-functional.

62 In many bacteria including the plant symbiont *Sinorhizobium meliloti*, the *trp* genes are organized in  
63 several operons, only one of which is regulated by attenuation (Merino et al., 2008). In *S. meliloti*, the  
64 *trp* attenuator is located upstream of *trpE(G)* (Fig. 1A), which is transcribed separately from *trpDC* and  
65 *trpFBA* (Bae and Crawford, 1990). We recently found that, in *S. meliloti*, the released *trpL*-containing  
66 attenuator RNA destabilizes the *trpDC* mRNA in *trans* (Melior et al., 2019). This small RNA (sRNA)  
67 was named rnTrpL (synonym RcsR1; Baumgardt et al., 2016). Previously, rnTrpL was predicted to  
68 base-pair with several additional mRNAs including *sinI* (encoding an autoinducer synthase), which  
69 was subsequently confirmed to be another direct target of rnTrpL (Baumgardt et al., 2016).

70 Transcription attenuators are prevalent in amino acid (aa) biosynthesis operons of gram-negative  
71 bacteria (Vitreschak et al., 2004). Recently, they were also found to regulate antibiotic resistance  
72 operons of gram-positive bacteria: upon exposure of *Bacillus* or *Listeria* to translation-inhibiting  
73 antibiotics, ribosome stalling at uORFs prevents termination of transcription, thus inducing the  
74 expression of downstream resistance genes (Dar et al., 2016). The widespread occurrence and high  
75 synteny conservation of attenuator uORFs raises the question of whether some of their leader  
76 peptides may have gained independent functions in *trans* during evolution. This hypothesis is inspired  
77 by the increasing evidence for functional small proteins encoded by sORFs shorter than 50 codons,  
78 which often are missing in current genome annotations (Storz et al., 2014). For example, in  
79 *Drosophila*, small proteins of between 11 and 32 aa in length regulate cell morphogenesis (Kondo et

80 al., 2007) and, in *Bacillus subtilis*, the basic 29-aa protein FbpC was proposed to act as an RNA  
81 chaperone (Gaballa et al., 2008), whereas, in *E. coli*, the 31-aa protein MgtS was shown to interact  
82 with two different proteins and regulate  $Mg^{2+}$  homeostasis (Yin et al., 2018). These examples  
83 underline why sORF-encoded proteins have become an important research field (Andrews and  
84 Rothnagel, 2014; Storz et al., 2014; Omasits et al., 2017; Weaver et al., 2019).

85 Here, we analyzed a predicted interaction between mRNA *rplUrpmA* and the attenuator sRNA *rnTrpL*,  
86 focusing on the sORF *trpL*. Surprisingly, we found that both the 14-aa leader peptide *peTrpL* and the  
87 sRNA *rnTrpL* are required for posttranscriptional downregulation of *rplUrpmA* upon exposure to  
88 translation-inhibiting antibiotics. Moreover, we found that *peTrpL* has an *rnTrpL*-independent role in  
89 the regulation of the major multidrug efflux pump operon *smeABR* in *S. meliloti*. Evidence for the  
90 conservation of both functions in other bacteria is presented.

91

## 92 **Results**

### 93 **The attenuator sRNA *rnTrpL* requires the leader peptide *peTrpL* and tetracycline for down-** 94 **regulation of *rplUrpmA* mRNA**

95 The *rplUrpmA* operon encodes the ribosomal proteins L21 and L27 and is one of the previously  
96 predicted but not yet experimentally verified targets of the sRNA *rnTrpL* (Baumgardt et al., 2016). To  
97 test this prediction, *rnTrpL* and mutated variants were constitutively overproduced from the tetracycline  
98 (Tc) resistance-conferring plasmid pRK-*rnTrpL* (Fig. S1) in strain *S. meliloti* 2011, and *rplUrpmA*  
99 mRNA levels were analyzed. Our preliminary data suggested that *rnTrpL*, *peTrpL* and Tc all play roles  
100 in *rplUrpmA* regulation (Fig. S2).

101 For further analyses, we used plasmids pSRKGm-*peTrpL* and pSRKGm-*rnTrpL*, which allow for IPTG-  
102 inducible production of *peTrpL* and a *rnTrpL* variant named *lacZ'*-*rnTrpL*, respectively, and confer  
103 gentamycin (Gm) resistance (Fig. S1). Cultures of *S. meliloti* 2011 harboring either pSRKGm-*peTrpL*  
104 or pSRKGm-*rnTrpL* were grown in parallel with two-plasmid cultures that additionally contained the  
105 empty plasmid pRK4352, which conferred Tc resistance. IPTG was added for 10 min or for 4 h  
106 respectively, and changes in the *rpmA* level were analyzed. In the presence of Tc (and pRK4352), the  
107 *rpmA* levels of both *rnTrpL*- and *peTrpL*-overproducing strains were decreased at 10 min post  
108 induction (p. i.) (Fig. 1B). Interestingly, at 4 h p. i., *rpmA* levels were found to be increased. This  
109 increase was similar to the increase observed upon constitutive *rnTrpL* overproduction using pRK-  
110 *rnTrpL* (see left bar C in Fig. 1B; see also Fig. S2). Notably, in all cultures without Tc (and without  
111 pRK4352), no change in the *rpmA* levels was observed (Fig. 1B). This suggested that (i) a short-term  
112 (10-min) overproduction of the leader peptide *peTrpL* in strain 2011 is sufficient to cause a decrease of  
113 cellular *rpmA* mRNA levels, while a long-term overproduction (4 h after IPTG addition or upon  
114 constitutive overproduction) causes an increase and (ii) these effects may be dependent on Tc.

115 Next, we analyzed the short-term effects in a  $\Delta trpL$  background. Strain 2011 $\Delta trpL$  (pSRKGm-*rnTrpL*,  
116 pRK4352) was grown in medium containing Tc and Gm. 10 min p. i. of *lacZ'*-*rnTrpL* (and of *peTrpL*  
117 encoded by this sRNA), the *rpmA* level was decreased like in strain 2011 that still harbored the

118 chromosomal *trpL* gene (compare Fig. 1C to Fig. 1B). Interestingly, if 2011 $\Delta$ *trpL* (pSRKGm-peTrpL,  
119 pRK4352) was used (i.e., a  $\Delta$ *trpL* strain that only produces peTrpL upon induction), no significant  
120 change in the *rpmA* level was observed (Fig. 1C), suggesting that the negative effect on *rpmA*  
121 required the presence of both the peptide and the sRNA. To test this, we used two plasmids, each one  
122 of them conferring either the sRNA (pRK-rnTrpL-AU1,2UA; see Fig. S2) or the peptide (pSRKGm-  
123 peTrpL) function only. A decrease of the *rpmA* level was detected only if both the sRNA and the  
124 peptide were produced (Fig. 1D), providing evidence that both peTrpL and rnTrpL are required to  
125 downregulate *rplUrpmA*.

126 To investigate a possible involvement of Tc in the regulation of *rplUrpmA* by rnTrpL and peTrpL, cells  
127 of strain 2011 $\Delta$ *trpL* (pSRKGm-rnTrpL, pRK4352) were washed and grown for 4 h in medium without  
128 Tc to remove possible effects of Tc on gene expression (Fig. 1E; see also Fig. S2). Then, lacZ'-rnTrpL  
129 production was induced with IPTG. After 10 min, Tc was added and the cells were incubated for  
130 another 10 min with IPTG and Tc. RNA was isolated at 0, 10 and 20 min (Fig. 1E) and changes in the  
131 *rpmA* levels were analyzed. Fig. 1F shows that the *rpmA* level was only decreased if both IPTG and  
132 Tc were present in the medium. The *rpmA* level was not changed if lacZ'-rnTrpL production was  
133 induced with IPTG in Tc-free medium (t = 10 min in Fig. 1E; see the bar marked with an asterisk in  
134 Fig. 1F). Importantly, 10 min after Tc addition to this IPTG-induced culture, the *rpmA* level decreased  
135 (t = 20 min in Fig. 1E; see the bar marked with two asterisks in Fig. 1F). Since the *rpmA* decrease was  
136 similar at 10 min and 20 min after simultaneous addition of IPTG and Tc (see the two left bars in Fig.  
137 1F), the observed change in the *rpmA* level at 10 min after Tc addition to the IPTG-induced culture (t =  
138 20 min in Fig. 1E) can be attributed to the Tc exposure. This Tc-dependent regulation was specific to  
139 *rplUrpmA*, since the level of the *trpC* mRNA was always decreased upon rnTrpL induction, regardless  
140 of the presence/absence of Tc (Fig. S3). Together, these results suggested that Tc directly contributes  
141 to the down-regulation of *rpmA* by peTrpL and rnTrpL.

142

### 143 **The sRNA rnTrpL base pairs with *rplU* and destabilizes *rplUrpmA* mRNA**

144 Next, we tested experimentally the predicted base-pairing between rnTrpL and *rplU* (Fig. 2A). For this,  
145 we performed two-plasmid assays in strain 2011 $\Delta$ *trpL* using lacZ'-rnTrpL derivatives (transcribed from  
146 pSRKTc conferring resistance to Tc) and bicistronic *rplUrpmA*'::*egfp* reporter constructs (on pSRKGm  
147 conferring resistance to Gm; see Fig. S1). Each *rplUrpmA*'::*egfp* construct was co-induced with  
148 wildtype or mutated lacZ'-rnTrpL and fluorescence was measured 20 min after IPTG addition. Fig. 2B  
149 shows that L27'-EGFP fluorescence derived from plasmid pSRKGm-rplUrpmA'-*egfp* was strongly  
150 decreased if lacZ'-rnTrpL was co-expressed, in line with the idea that the sRNA binds to *rplU* and  
151 thereby induces a reduction of *rplUrpmA*'::*egfp* mRNA levels. In contrast, sRNA derivatives harboring  
152 the GG46,47CC and CG40,41GC mutations, respectively, did not cause this effect. Importantly,  
153 compensatory mutations in the *rplUrpmA*'::*egfp* transcript (CC/GG exchange at positions 221 and 222  
154 of the *rplU* ORF, see Fig. 2A), which were designed to restore the base-pairing to rnTrpL-GG46,47CC,  
155 specifically restored the negative effect of the sRNA on fluorescence levels. Similarly, the introduction  
156 of a compensatory mutation, G228C, into *rplU* (Fig. 2A) could be shown to cause a down-regulation of  
157 the reporter by rnTrpL-CG40,41GC (Fig. 2B). These results validate the base-pairing between rnTrpL

158 and *rplU* and show that even subtle changes in the number of base-pairing interactions may have  
159 major consequences for downregulation of *rplUrpmA*.

160 The downregulation of *rplUrpmA* by rTrpL may be explained by a destabilization of the mRNA.  
161 Consistent with this hypothesis, we observed that, upon lacZ'-rTrpL induction, the half-life of *rpmA*  
162 was shortened, while that of the control mRNA *rpoB* was not changed (Fig. 2C). Since the interaction  
163 site of the sRNA rTrpL is located in *rplU*, this result allows us to conclude that the bicistronic  
164 *rplUrpmA* mRNA is destabilized by the sRNA.

165

### 166 **Tc-dependent coimmunoprecipitation with 3xFLAG-peTrpL reveals a new target mRNA and** 167 **antisense RNAs**

168 Based on data shown in Fig. 1, we hypothesized that rTrpL, peTrpL, Tc and *rplUrpmA* mRNA form a  
169 complex in *S. meliloti*. To isolate this complex, we decided to produce an N-terminally triple FLAG-  
170 tagged version of TrpL (3xFlag-peTrpL) and to perform coimmunoprecipitation (CoIP) experiments.  
171 First, we tested whether 3xFlag-peTrpL is functional. We detected a decrease in the *rpmA* level 10  
172 min post IPTG addition to cultures of strain 2011 (pSRKGm-3xFlag-peTrpL, pRK4352) (Fig. 3A).  
173 Although this decrease was less pronounced than the decrease caused by wild-type peTrpL, this  
174 result suggested that 3xFlag-peTrpL largely retained the functionality of the native peptide.

175 For the CoIP, lysates were prepared at 10 min after IPTG addition to cultures of strain 2011  
176 (pSRKGm-3xFlag-peTrpL, pRK4352) and the control strain 2011 (pSRKGm-peTrpL, pRK4352),  
177 respectively, both grown in the presence of Gm and Tc. We considered the possibility that the  
178 formation of a complex containing peTrpL, rTrpL and *rplUrpmA* may depend on the presence of Tc.  
179 Therefore, after incubation of a lysate with FLAG-tag-antibodies coupled to beads, the beads were  
180 divided into two fractions. One half was washed with a Tc-containing buffer (2 µg/ml Tc), while the  
181 second half was washed with buffer without Tc. Then, coimmunoprecipitated RNA was purified and  
182 analyzed by qRT-PCR. The sRNA rTrpL was strongly enriched by CoIP with the 3xFLAG-peTrpL, but  
183 only if Tc was present in the washing buffer (Fig. 3B). Similarly, *rplUrpmA* could be coprecipitated in a  
184 Tc-dependent manner, while none of the control mRNAs (*trpDC*, *trpE*) could be coprecipitated (Fig.  
185 3B). These data support the idea that interactions between the attenuator sRNA rTrpL, the leader  
186 peptide peTrpL and their target mRNA *rplUrpmA* are facilitated by (or even dependent on) the  
187 presence of Tc.

188 To identify peTrpL interaction partners, the CoIP-RNA samples were subjected to RNAseq analysis,  
189 which revealed an enrichment of RNAs corresponding to three genomic loci (rTrpL, *rplUrpmA*, and  
190 SM2011\_c02866) (Fig. 3C). The SM2011\_c02866 mRNA encodes the TetR-type transcription  
191 regulator SmeR, a repressor of the *smeAB* multidrug efflux pump genes (Eda et al. 2011). The Tc-  
192 dependent enrichment of *smeR* was confirmed by qRT-PCR (Fig. 3B).

193 Surprisingly, the RNAseq data also revealed the presence of antisense RNAs (asRNAs)  
194 corresponding to *smeR*, *rplUrpmA* and rTrpL in the CoIP samples (Fig. 3C; see also Fig. S3),  
195 possibly indicating an antisense mechanism of gene regulation that involves peTrpL.

196

### 197 **The peptide peTrpL is involved in the regulation of the multidrug efflux pump operon *smeABR***

198 To test whether peTrpL regulates *smeR*, we analyzed the *smeR* mRNA levels before and after  
199 induced production of rnTrpL or peTrpL in a  $\Delta trpL$  background, in the presence or absence of Tc, as  
200 described above for *rplUrpmA* (compare to Fig. 1B). Induction of peTrpL production for 10 min proved  
201 to be sufficient for decreasing *smeR* mRNA levels in a Tc-dependent but rnTrpL-independent manner  
202 (Fig. 4A). This decrease was (at least in part) due to a destabilization of the *smeR* mRNA (Fig. 4B).  
203 Given that *smeR* down-regulation most likely leads to reduced production of the SmeR repressor  
204 which, in turn, would result in increased *smeAB* expression, we analyzed the *smeA* mRNA level and  
205 found that it was significantly increased at 20 min (but not 10 min) p. i. of peTrpL production (Fig. 4C).  
206 This supports the idea that, in the presence of Tc, the rnTrpL-independent destabilization of *smeR*  
207 mRNA by peTrpL causes an upregulation of *smeAB*.

208 The *smeR* gene is located downstream of *smeAB* (Eda et al., 2011; Fig. 4F). We found that *smeABR*  
209 are cotranscribed upon exposure of strain 2011 $\Delta trpL$  to Tc (Fig. 4D), a condition under which *smeAB*  
210 upregulation, but *smeR* downregulation would be expected. Thus, the posttranscriptional  
211 downregulation of *smeR* by peTrpL probably serves to achieve differential expression of *smeAB* and  
212 *smeR* despite their cotranscription. According to Fig. 3C, an asRNA is probably involved in this  
213 regulation. To test whether a Tc-inducible antisense promoter  $P_{as}$  is present downstream of *smeR*, we  
214 used plasmid pSUP-PasRegfp harboring a transcriptional fusion of *egfp* to the putative  $P_{as}$  (Fig. S1).  
215 The level of the reporter mRNA *egfp* was strongly increased after 10 min exposure to Tc or to other  
216 known SmeR-effectors: the plant flavonoid genistein (Gs) and the antibiotics chloramphenicol (Cl),  
217 erythromycin (Em) and rifampicin (Rf) (Fig. 4E). Kanamycin (Km) and the flavonoid luteolin (Lt), which  
218 are not SmeR effectors, were used as negative controls. Thus, transcription of the asRNA As-*smeR*  
219 was induced by the same antimicrobial substances that (also) induce *smeABR* transcription (Eda et  
220 al., 2011). Probably, As-*smeR* is involved in the destabilization of *smeR* mRNA by peTrpL (Fig. 4F).

221

### 222 **peTrpL increases the multi-resistance of *S. meliloti***

223 The data shown in Fig. 4 suggest that peTrpL may contribute to increased resistance towards multiple  
224 SmeR effectors. To corroborate this hypothesis, we tested if induction of peTrpL production (using  
225 pSRKGm-peTrpL) influences the intrinsic resistance of strain 2011 $\Delta trpL$  to Tc and natural  
226 tetracyclines. As a control, a plasmid was constructed in which the third codon of the ORF was  
227 replaced with a stop codon (pSRKGm-peTrpL-3.UAG). Zone of growth inhibition tests revealed an  
228 increased resistance (smaller bacterial-free halo) only if the production of peTrpL was induced (Fig. 5A  
229 and 5B; Fig. S4). Consistently, induction of ectopic peTrpL production enabled *S. meliloti* to reach  
230 higher ODs in liquid cultures containing 0.2  $\mu\text{g/ml}$  Tc, a concentration ten-fold lower than the minimal  
231 inhibitory concentration (MIC) (Fig. 5C).

232 Next, we compared strains 2011 and 2011 $\Delta trpL$ . Both strains reached similar ODs in the absence of  
233 Tc, and they failed to grow in medium containing 10  $\mu\text{g/ml}$  Tc, which was half of the concentration

234 used in our selective media. However, in medium supplemented with 0.2 µg/ml Tc, the parental strain  
235 2011 reached a significantly higher OD compared to the deletion mutant 2011Δ*trpL* (Fig. 5D), showing  
236 that the native *trpL* is important for the Tc resistance of *S. meliloti*.

237 According to Fig. 4, a Tc-triggered and peTrpL-dependent down-regulation of *smeR* should cause an  
238 increased multidrug efflux. To provide additional support for this model, NileRed efflux assays were  
239 performed with strain 2011Δ*trpL* (pSRKGm-peTrpL) and the corresponding EVC in liquid cultures  
240 containing 1.5 µg/ml Tc. Fig. 5E shows that the intrinsic efflux pump activity of *S. meliloti* was (only)  
241 increased under conditions when peTrpL production was induced.

242 Finally, we tested whether peTrpL mediates resistance to other SmeR-effectors in addition to Tc. Fig.  
243 5F shows that induced peTrpL production increased the MICs for Cl, Em, Rf and Gs, while, as  
244 expected, the MICs for Km and Lt were not affected by peTrpL. In conclusion, peTrpL contributes to  
245 the *smeAB*-mediated multiresistance of *S. meliloti*.

246

#### 247 **Gene regulation in *trans* by two different peTrpL-dependent pathways**

248 The above results suggest that, upon exposure to Tc, the peptide peTrpL contributes to two different  
249 regulatory pathways: an rnTrpL-dependent pathway for *rplUrpmA* downregulation and an rnTrpL-  
250 independent pathway, in which *smeR* is downregulated. Since the first pathway affects ribosomal  
251 genes and Tc inhibits translation, we hypothesized that this pathway is a response to translation  
252 inhibition. Thus, we proposed that, in addition to Tc, *rplUrpmA* downregulation should be triggered also  
253 by other translation inhibiting antibiotics, such as, Km, Cl and Em, but not by Gs (a tyrosine protein  
254 kinase inhibitor) (Akiyama et al., 1987). In contrast, the second rnTrpL-independent pathway should be  
255 triggered by the SmeR-effectors Cl, Em and Gs but not by Km, which is not an effector of SmeR.

256 To test this, strain 2011 was exposed for 10 min to subinhibitory concentrations of the antimicrobial  
257 compounds mentioned above, and changes in the levels of *smeR* and *rpmA* were analyzed (Fig. 6A).  
258 The results fully supported our hypothesis: i) the *rpmA* level was decreased upon exposure to Km, Cl,  
259 Em and Tc, but not Gs, and ii) the *smeR* level was decreased upon exposure to Cl, Em, Gs and Tc,  
260 but not Km. Treatment of the deletion mutant 2011Δ*trpL* revealed no change in the levels of *rpmA* and  
261 *smeR* (Fig. S5), supporting the critical role of *trpL* in downregulation of these genes upon exposure to  
262 antimicrobial substances. Together, the results shown in Fig. 6A support the existence of two peTrpL-  
263 dependent pathways for posttranscriptional regulation.

264 Based on data shown in Fig. 3B, we proposed that translation-inhibiting antibiotics may be critical for  
265 an interaction of peTrpL with rnTrpL and *rplUrpmA*, while SmeR-effectors may be needed for an  
266 interaction with *smeR* mRNA. To test this, CoIP with 3xFLAG-peTrpL was conducted 10 min after  
267 exposure to Km, Cl or Gs at subinhibitory concentrations. Analysis of the coimmunoprecipitated RNA  
268 was in full agreement with our hypothesis (Fig. 6B): i) rnTrpL and *rplUrpmA*, but not *smeR* were  
269 enriched in the presence of Km (which causes translation inhibition without being a SmeR-effector), ii)  
270 rnTrpL, *rpmA* and *smeR* were enriched in the presence of Cl (which, like Tc, is a translational inhibitor  
271 and SmeR-effector; compare to Fig. 3B), and iii) *smeR* (but not rnTrpL and *rplUrpmA*) was enriched in



272 the presence of Gs (SmeR-effector only). Thus, different antimicrobial compounds seem to promote  
273 specific interactions between peTrpL and its RNA targets.

274

### 275 **Generation of the sRNA rnTrpL in response to translation inhibition**

276 Is there a functional link between the *trpL* attenuator, translation inhibition and regulation of *rplUrpmA*  
277 in *S. meliloti*? Our data, along with earlier studies showing that, in *E. coli*, ribosome pausing in the first  
278 half of *trpL* mediates transcription termination between *trpL* and *trpE* (Zurawski et al., 1978), led us to  
279 address the question of whether translation inhibition causes rnTrpL generation independently of the  
280 Trp availability. We tested whether under conditions of Trp insufficiency (when *trpLE(G)*  
281 cotranscription takes place) transcription is terminated downstream of *trpL* upon addition of Tc. We  
282 used strain 2011 $\Delta$ *trpC*, in which the attenuation can be easily assessed (Bae and Crawford, 1990).  
283 Fig. 6C shows that after 4 h of growth under Trp-limiting conditions, rnTrpL was essentially non-  
284 detectable in the Northern hybridization. Addition of 1.5  $\mu$ g/ml Tc to this culture resulted in increased  
285 rnTrpL levels, in line with the proposed transcription termination as a consequence of ribosome  
286 pausing at the first *trpL* codons. Accordingly, removal of Tc from the medium led again to a decrease  
287 in the rnTrpL levels (Fig. 6C).

288 These results support the idea that bacteria use the uORF *trpL* to sense translation inhibition and  
289 respond by releasing an sRNA that down-regulates specific ribosomal genes (Fig. 6D). In addition,  
290 these data show that the *trpL* attenuator senses two different signals, Trp availability and translation  
291 inhibition.

292

### 293 **Conservation of rnTrpL and peTrpL function in other bacteria**

294 Next we tested whether the role of rnTrpL and peTrpL in *rplUrpmA* and *smeR* regulation is conserved  
295 in other bacteria. For this we used *Agrobacterium tumefaciens* (which, together with *S. meliloti*,  
296 belongs to the *Rhizobiaceae*), and the more distantly related *Bradyrhizobium japonicum* (a  
297 *Bradyrhizobiaceae* member). In both species, the mRNA levels of *rpmA* and of their *smeR* homologs  
298 were decreased upon overproduction of Atu-rnTrpL and Bja-rnTrpL, respectively (Fig. 7A).  
299 Furthermore, the MIC of Tc for *A. tumefaciens* was increased upon overproduction of Atu-peTrpL (Fig.  
300 7B) and overproduction of Bja-peTrpL enabled growth of *B. japonicum* at high Tc concentration (Fig.  
301 7C). Importantly, production of Atu-peTrpL and Bja-peTrpL in *S. meliloti* did not increase resistance in  
302 this heterologous host (Fig. S6).

303 *In silico* analysis of putative peTrpL peptides from other Rhizobiales revealed several groups of  
304 conserved leader peptides that generally conform to the taxonomy (Fig. S7 and Table S1). The  
305 consensus peTrpL sequences of the *Sinorhizobium*, *Agrobacterium* and *Bradyrhizobium* groups are  
306 shown in Fig. 7D. A comparison of the sequence logos with the functional data shows that the patterns  
307 of evolutionary and sequence conservation are markedly different. The low sequence conservation of  
308 peTrpL is in line with its non-functionality in heterologous hosts (Fig. S6).

309 To determine functionally important aa residues in peTrpL of *S. meliloti*, we performed alanine  
310 scanning mutagenesis and tested the functionality of the mutagenized peptides in strain 2011.  
311 Compared to the wildtype peTrpL, the strongest effects were caused by Ala substitutions of Thr4, Ser8  
312 and Trp12, respectively. Induced production of these mutated peptides led to an increase in the levels  
313 of both *rpmA* and *smeR*, instead of a decrease (Fig. 7E). Surprisingly, Thr4 and Ser8 are not  
314 conserved even in the *Sinorhizobium* group (Fig. 7D).

315

## 316 Discussion

317 In this study, we show that a bacterial uORF, originally known for its role in ribosome-mediated  
318 attenuation (Bae and Crawford, 1990), gives rise to a functional regulatory peptide. Our data provide  
319 strong evidence that, in *S. meliloti*, the 14-aa leader peptide peTrpL causes a downregulation of  
320 *rplUrpmA* expression upon exposure to translation-inhibiting antibiotics, and acts in conjunction with  
321 the attenuator sRNA rnTrpL. Moreover, we show that peTrpL has an rnTrpL-independent function in  
322 mediating multiresistance. Taken together, these data suggest strikingly multilayered effects of this  
323 mRNA leader in *S. meliloti*.

324 Few other bacterial 5'-UTRs are known to respond to different intercellular signals or to act both in *cis*  
325 and in *trans*. The 5'-UTR of *mgtA*, which encodes a Mg<sup>2+</sup> transporter in *Salmonella*, is one of the few  
326 examples of a *cis*-acting attenuator that is capable of sensing disparate signals. It harbors a proline-  
327 rich uORF and can respond to proline shortage or a decline in Mg<sup>2+</sup> concentrations (Park et al., 2010;  
328 Chadani et al., 2017). Metabolite-binding riboswitches that can act in *cis* and in *trans* were described  
329 in *Listeria* and *Enterococcus* (Loh et al., 2009; DebRoy et al., 2014). The *trpL* attenuator of *S. meliloti*  
330 combines similar mechanisms in an exceptional complexity. We show that, in addition to acting as a  
331 regulatory RNA both in *cis* and in *trans* (Melior et al., 2019), it senses in *cis* two disparate signals (Trp  
332 availability and translation inhibition), and encodes a *trans*-acting peptide. This complexity is further  
333 increased because both *trans*-acting products (rnTrpL and peTrpL) regulate more than one gene and  
334 are able to act separately and together.

335 The peptide peTrpL seems to use different mechanisms, since it needs the sRNA rnTrpL only for the  
336 destabilization of *rplUrpmA*, but not for *smeR* (a *smeR*-specific sRNA candidate was not  
337 coimmunoprecipitated with 3xFLAG-peTrpL). The posttranscriptional regulation by peTrpL seems to  
338 be intimately linked to the presence of antibiotics, which obviously promote the interaction with its  
339 target mRNAs. Furthermore, the peTrpL function seems to be linked to asRNAs, since *smeR*,  
340 *rplUrpmA* and rnTrpL were coimmunoprecipitated with the corresponding asRNAs. While the  
341 antibiotic-induced generation of the asRNA As-*smeR* could explain the *smeR* downregulation without  
342 a need for an sRNA (Fig. 4F; Waters and Storz, 2009), the CoIP of RNAs antisense to rnTrpL and  
343 *rplUrpmA* is puzzling. According to Fig. 2, the imperfect complementarity between the sRNA rnTrpL  
344 and the mRNA *rplUrpmA* is necessary for the peTrpL-dependent mRNA destabilization, and such  
345 complementarity is usually needed for a conventional regulation by base-pairing sRNAs in bacteria,  
346 without a need for asRNAs (Waters and Storz, 2009).

347 The attenuator sRNA rnTrpL also seems to use different mechanisms because, in contrast to  
348 *rplUrpmA*, the destabilization of its target mRNAs *sinI* (Baumgardt et al., 2016) and *trpDC* (Melior et  
349 al., submitted) does not depend on peTrpL or exposure to antibiotics. The need for peTrpL and an  
350 antibiotic for *rplUrpmA* downregulation may serve to redirect rnTrpL from other mRNAs (*trpDC*, *sinI*) to  
351 this target of interest under the conditions of translation inhibition. The antibiotic-triggered  
352 downregulation of *rplUrpmA* probably represents a novel posttranscriptional mechanism that may be  
353 used to adjust the production and/or function(s) of the protein biosynthesis machinery. Lower levels of  
354 *rplUrpmA* mRNA may negatively influence ribosome biogenesis and/or result in ribosomes lacking the  
355 L21 and L27 proteins. While the function of L21 is not clear, *E. coli* L27-deficient mutants were shown  
356 to have reduced peptidyl transferase activities (Maguire et al., 2005). Interestingly, it was shown  
357 previously that a two-fold reduction of *rplUrpmA* expression in *Pseudomonas aeruginosa* leads to an  
358 increased expression of multidrug efflux pump genes and increased resistance to aminoglycosides.  
359 This was explained by attenuation of transcription termination, caused by pausing of L21- and L27-  
360 less ribosomes (Lau et al., 2012). It therefore seems reasonable to suggest that, in *S. meliloti*, the  
361 down-regulation of *rplUrpmA* by rnTrpL and peTrpL may have similar adaptation effects mediated by  
362 specific changes in translation.

363 The observed generation of the sRNA rnTrpL upon translation inhibition, even under conditions of Trp  
364 insufficiency (Fig. 6C and 6D), shows how bacteria can make use of a uORF and mutually exclusive  
365 RNA structures of a well-known attenuator for alternative purposes. The rnTrpL sRNA production upon  
366 ribosome pausing in the 5'-part of the uORF *trpL* may have additional implications. We note that, in all  
367 *Sinorhizobium* species, two Asn and one Gln codon(s) are located in the first half of *trpL*. Pausing of  
368 the ribosome at these codons, for example upon shortage of aminoacylated tRNA-Asn and tRNA-Gln,  
369 could also result in rnTrpL production. Thus, *trpL* is well-suited for the sensing of nitrogen depletion in  
370 *Sinorhizobium*. In most ribosome-dependent transcription attenuators of aa biosynthesis operons, the  
371 relevant aa codons are located in the 3'-half of the uORF (Vitreschak et al., 2004). Translation  
372 inhibition at such attenuators would also generate sRNAs with potential functions in *trans*.

373 Unexpectedly, our CoIP analyses revealed a function of peTrpL in the posttranscriptional regulation of  
374 the multidrug efflux pump operon *smeABR*. SmeR is a homolog of the multidrug-binding repressor  
375 TtgR from *Pseudomonas putida* (Teran et al., 2006), which explains its interactions with several  
376 effectors, while the co-transcription of the *smeR* repressor gene together with the *smeAB* efflux pump  
377 genes explains the need for differential regulation at the posttranscriptional level. The observed peTrpL-  
378 dependent down-regulation of *smeR* followed by upregulation of *smeA* (Fig. 5), the increase in the  
379 cellular efflux activity, and the MIC increase observed for all tested SmeR-effectors (Fig. 6), clearly  
380 show the key role of peTrpL in multiresistance. Importantly, this function and even the function of  
381 peTrpL in *rplUrpmA* downregulation is conserved among Alphaproteobacteria, despite the low  
382 conservation of its sequence (Fig. 7). This high sequence divergence might be forced by the (at least)  
383 dual function in *trans* of the leader peptide. It probably reflects molecular adaptation to (co-evolution  
384 with) interaction partners in the respective host.

385 The peTrpL-mediated resistance of *S. meliloti* and other Alphaproteobacteria, including the plant  
386 pathogen *A. tumefaciens*, is probably crucial for survival in soil, the rhizosphere, and plants, where

387 exposure to antimicrobial compounds is common. Indeed, the SmeAB efflux pump is known to be  
388 important for nodulation competitiveness (Eda et al., 2011). Bacterial strategies that ensure survival at  
389 high antibiotic concentrations and increase the competitiveness at subinhibitory concentrations are  
390 relevant from both an evolutionary and medical point of view (D'Costa et al., 2011; Nelson and Levy,  
391 2011; Anderson and Hughes, 2014). Although *S. meliloti* is a soil bacterium with no medical relevance,  
392 it is a major model organism for studying interactions between bacteria and higher organisms (Jones  
393 et al., 2007). The identification of an attenuator leader peptide as a conserved player in the intrinsic  
394 bacterial resistance to antibiotics is interesting for two reasons: first, this new knowledge opens new  
395 perspectives in understanding the bacterial physiology and evolution, and second, it potentially  
396 provides new targets for antibacterial control.

397 In summary, our work shows the role of the peptide peTrpL in two different posttranscriptional  
398 pathways (triggered by translation inhibitors or SmeR effectors, respectively) in *trans*, broadens the  
399 target spectrum of the attenuator sRNA rnTrpL, and demonstrates the exceptionally complex  
400 regulatory functions exerted by the *trpL*-containing mRNA leader. The data obtained in this study  
401 encourage future detailed analyses of novel physiological roles of bacterial attenuator RNAs and the  
402 leader peptides encoded by these RNAs.

403

## 404 **Material and Methods**

### 405 **Cultivation of bacteria and conjugation**

406 *E. coli* strains were cultivated in LB supplemented with appropriate antibiotics: Tetracycline (Tc, 20  
407 µl/ml), gentamycin (Gm, 10 µg/ml), ampicillin (200 µg/ml). TY was used as growth medium for  
408 prototrophic *S. meliloti* and *A. tumefaciens* strains (Baumgardt et al., 2016). Auxotrophic *S. meliloti*  
409 2011Δ*trpC* strains were grown in minimal GMX medium (Schlüter et al., 2010) supplemented with L-  
410 tryptophan (Trp) as indicated in Fig. 6. *B. japonicum* was grown in PSY medium as described (Hahn et  
411 al., 2017). Liquid cultures of Alphaproteobacteria were cultivated semiaerobically (30 ml medium in a  
412 50 ml Erlenmeyer flask with shaking at 140 r. p. m.) at 30°C to an OD<sub>600nm</sub> of 0.5, and then processed  
413 further. Antibiotics in selective plates or liquid media for Alphaproteobacteria were used at the  
414 following concentrations, unless stated otherwise: Tetracycline (20 µg/ml for *S. meliloti* and *A.*  
415 *tumefaciens*; *B. japonicum* was cultivated with 25 µg/ml Tc in liquid and 50 µg/ml Tc on plates),  
416 gentamycin (10 µg/ml in liquid cultures and 20 µg/ml in plates), streptomycin (250 µg/ml),  
417 spectinomycin (100 µg/ml). IPTG was added to a final concentration of 1 mM. For growth experiments  
418 in 96-well microtiter plates, 300 µl culture (diluted to an OD<sub>600nm</sub> of 0.1) per well was used. Plates were  
419 incubated on the shaker (140 r. p. m.) at 30 °C for 60 h (till the cultures entered the stationary phase).

420 Constructed plasmids were transferred to *S. meliloti*, *A. tumefaciens* or *B. japonicum* by diparental  
421 conjugation with *E. coli* S17-1 as the donor. Bacteria were mixed, washed in saline and spotted onto a  
422 sterile membrane filter, which was placed onto a TY plate without antibiotics. After incubation for at  
423 least 4 h (for *S. meliloti* and *A. tumefaciens*) or 3 days (for *B. japonicum*) at 30 °C, serial dilutions were  
424 spreaded on agar plates with selective antibiotics.

## 425 Cloning procedures and plasmid characteristics

426 Plasmid preparation, restriction analysis, purification of DNA fragments from agarose gels, and cloning  
427 procedures were performed as described by Sambrook et al. (1989). FastDigest restriction enzymes  
428 and Phusion polymerase were used routinely for cloning in *E. coli*. PCR amplicons were first cloned in  
429 pJet1.2/blunt and the inserts were then subcloned into the conjugative, broad-host range vectors  
430 pRK4352, pSRKGm, pSRKTc (which can replicate in *S. meliloti* and *A. tumefaciens*) or in pRJ-MCS  
431 (used for chromosomal integration in *B. japonicum*). Alternatively, for very short inserts (e.g. *trpL*  
432 ORFs with codons exchanged for synonymous codons, or with mutated codons), complementary  
433 oligonucleotides were annealed and the resulting double-strand DNA with suitable single-stranded,  
434 cohesive ends, was cloned directly into the desired conjugative plasmids. Insert-containing plasmids  
435 were analyzed by Sanger sequencing with plasmid-specific primers (sequencing service by Microsynth  
436 Seqlab, Göttingen, Germany) prior to conjugation. All oligonucleotides (primers) are listed in Table S3.  
437 They were synthesized by Microsynth, Balgach (Switzerland).

438 All plasmids are listed in Table S2. pRK-rnTrpL is a pRK4352 derivative. It leads to constitutive  
439 transcription of rnTrpL in *S. meliloti*. Plasmids pRK-rnTrpL-AU1,2UA, pRK-rnTrpL-CG40,41GC, pRK-  
440 rnTrpL-G44C and pRK-rnTrpL-GG46,47CC are pRK-rnTrpL derivatives harboring the indicated  
441 mutations in the rnTrpL sequence. In the rnTrpL-AU1,2UA, the start codon was exchanged for a stop  
442 codon, thus inactivating the *trpL* sORF. The CG40,41GC mutation causes an Arg/Ala exchange in  
443 peTrpL and weaker base-pairing with *rplU*, the mutations G44C weakens the base pairing with *rplU*  
444 and changes the *trpL* stop codon to a sense codon, and the mutation GG46,47CC, which is located  
445 downstream of the *trpL* stop codon, weakens the base-pairing with *rplU*.

446 Plasmids pSRKTc-rnTrpL and pSRKGm-rnTrpL allow for IPTG-inducible transcription of the  
447 recombinant rnTrpL derivative lacZ'-rnTrpL (Melior et al., submitted). In contrast to the leaderless wild  
448 type (wt) rnTrpL, which starts directly with the ATG of *trpL* (Bae and Crawford, 1990), the rnTrpL  
449 variant harbors the *lacZ* 5'-UTR with a ribosome binding site. Its capability to act in *trans* and to  
450 downregulate *trpDC* was shown previously (Melior et al., submitted). Plasmid pSRKGm-peTrpL allows  
451 for IPTG inducible production of peTrpL. It contains the sORF *trpL* with several synonymous nucleotide  
452 substitutions (to avoid RNA-based effects), but without rare codons (to avoid toxicity; Zahn, 1996).  
453 Plasmid pSRKGm-3xFLAG-peTrpL harbors N-terminally fused codons for a triple FLAG-tag.

454 To construct pSRKGm-rplUrpmA'-egfp, primers NdeI-rplU-fw and 5'-egfp-rpmA-re were used to  
455 amplify the *rplUrpmA'* part of the construct, while *egfp* was amplified with primers rpmA-egfp-fw and  
456 XbaI-egfp-re. For overlapping PCR, primers NdeI-rplU-fw and XbaI-egfp-re were used, and the PCR  
457 product encompassing *rplUrpmA':egfp* was cloned into pJet1.2/blunt and then subcloned into  
458 pSRKGm. IPTG-induced transcription of the bicistronic *rplUrpmA':egfp* mRNA from pSRKGm-  
459 rplUrpmA'-egfp allows for production of L21 and the fusion protein L27'-EGFP, which contains only the  
460 first three N-terminal aa of L27 fused to the third aa of EGFP (Fig. S1). To introduce compensatory  
461 mutations into the *rplUrpmA':egfp* reporter, site-directed mutagenesis of pJet-rplUrpmA'-egfp was  
462 performed. Primer pair rplU-G-228-C-FW and rplU-G-228-C-RV was used for one nucleotide  
463 exchange, thus re-establishing the base pairing of *rplU* to the nucleotide at position 40 in rnTrpL (re-  
464 establishing the influence of rnTrpL-CG40,41GC on *rplUrpmA'*; see Fig. 2A). Further, primer pair rplU-

465 CC-222-GG-FW and rplU-CC-222-GG-RV was used for compensatory mutations re-establishing the  
466 base pairing with rnTrpL-GG46,47CC. The mutated inserts were then subcloned to create pSRKGm-  
467 rplU-CC221,222GG-rpmA'-egfp and pSRKGm-rplU-G228C-rpmA'-egfp.

468 To construct pSUP-PasRegfp, approximately 200 bp upstream of the putative transcription start site  
469 (TSS) of the antisense RNA As-smeR (according to the RNAseq data, see also Fig. 3C and Fig. 4F)  
470 was amplified using primers EcoRI-asP-smeR-f and asP-smeR-sSD-rev. The first two nucleotides  
471 downstream of the putative TSS were included in the reverse primer, which in addition contained the  
472 sequence of a typical bacterial ribosome binding site and the 5'-sequence of *gfp*. The *gfp* sequence of  
473 plasmid pLK64 was amplified with primers sSD-egfp-f and PstI-egfp-rev, and the two PCR products  
474 were used for overlapping PCR with primers EcoRI-asP-smeR-f and PstI-egfp-rev. The resulting PCR  
475 product was cloned into plasmid pSUP202pol4-exoP, which contains 300 nt of the 3' exoP region as a  
476 suitable chromosomal integration site, and was cut with EcoRI and PstI (Schlüter et al., 2015). The  
477 resulting plasmid pSUP-PasRegfp was used to analyze the antibiotic-induced transcription from a  
478 putative antisense promoter located downstream of *smeR*, using the *egfp* mRNA as reporter. Since  
479 pSUP-PasRegfp confers Tc resistance, it was necessary to incubate *S. meliloti* strains with  
480 chromosomally integrated pSUP-PasRegfp overnight without Tc (essentially all cells retained the  
481 plasmid, as revealed by qPCR analysis), before adding Tc again to test for induced promoter activity  
482 by qRT-PCR analysis of the reporter *egfp* mRNA.

#### 483 **Zone of growth inhibition tests**

484 For the zone of growth inhibition tests, strains 2011 $\Delta$ *trpL* (pSRKGm-peTrpL) and 2011 $\Delta$ *trpL*  
485 (pSRKGm-peTrpL-3.UAG) were used. 15 ml bottom TY agar was overlaid with 10 ml TY top agar  
486 mixed with 1 ml *S. meliloti* culture (OD<sub>600nm</sub> of 0.5). The bottom and the top agar were supplemented  
487 with 20 µg/ml Gm. After solidification of the top agar, a Whatman paper disk was placed in the middle  
488 of the plate and 5 µl Tc solution (10 µg/µl in 70% ethanol) were applied onto the disk. Plates were  
489 incubated over night at 30 °C, before measuring the diameter of the zone of growth inhibition.

#### 490 **EGFP fluorescence measurement**

491 *S. meliloti* 2011 $\Delta$ *trpL* strains containing two plasmids (pSRKGm- and pSRKTc- constructs for IPTG-  
492 induced expression of *egfp* reporter fusions and the sRNA, respectively), were cultivated in TY with  
493 Gm and Tc to an OD<sub>600nm</sub> of 0.5 and then the production of an EGFP fusion protein and the regulatory  
494 sRNA was induced simultaneously with 1 mM IPTG for 20 min. Then 300 µl of the cultures were  
495 transferred to a 96-well microtiter plate and EGFP fluorescence was measured on a Tecan Infinite  
496 M200 reader. ODs were also measured on the Tecan reader and used for normalization.

#### 497 **NileRed efflux assay**

498 The efflux assay was performed essentially as described by Bohnert et al. (2010). 10 ml of a *S. meliloti*  
499 culture was harvested. The pellet was washed in 20 mM potassium phosphate buffer (pH 7.0) (PPB)  
500 containing 1 mM MgCl<sub>2</sub>, and resuspended in PPB adjusting the OD<sub>600nm</sub> to 1.0. The cell suspension  
501 was incubated for 15 min at room temperature. 2 ml aliquots were transferred into glass tubes and the  
502 efflux pump inhibitor carbonyl cyanide 3-chlorophenylhydrazone (CCCP) was added at a final

503 concentration of 25 mM (5 mM stock solution in 50% DMSO). After 15 min 5 mM NileRed dye was  
504 added (a stock solution of 5 mM in 10% dimethyl formamide, 90% ethanol) and the cell suspension  
505 was incubated on a shaker (140 r. p. m.; 30 °C) for 3 h, followed by a 60 min incubation without  
506 shaking at room temperature and centrifugation for 5 min at 4,400 r. p. m. in the tabletop centrifuge.  
507 Supernatant was entirely removed and cells were resuspended in 1 ml PPB. Immediately thereafter  
508 0.3 ml of this cell suspension was transferred to a 96 well microtiter plate and 15 µl of 1 M glucose  
509 was added to trigger NileRed efflux. Fluorescence of the cell suspension was followed over 1500 sec  
510 (excitation at 552 nm, and emission at 636 nm) on the Tecan reader.

### 511 **RNA purification**

512 To purify total RNA of *S. meliloti* and *A. tumefaciens* for Northern blot hybridization and qRT-PCR  
513 analysis, 15 ml culture ( $OD_{600} = 0.5$ ) was filled into tubes with ice rocks (corresponding to a volume of  
514 15 ml) and pelleted by centrifugation at 6,000 g for 10 min at 4 °C. The pellet was resuspended in 250  
515 ml TRIzol. Cells were lysed in a shacking mill (4 °C) with glass beads, two times for 15 min,  
516 interrupted by incubation at 65 °C for 10 min. After addition of 750 µl TRIzol to the samples, RNA was  
517 isolated according to the manufacturer instructions. To remove residual RNases, the isolated RNA  
518 was additionally purified with hot-phenol, phenol:chloroform:isoamylalcohol and  
519 chloroform:isoamylalcohol, and then ethanol-precipitated. For RNA half-live measurements, 1 ml  
520 bacterial culture was added to 2 ml RNeasy Protect Bacteria Reagent (Qiagen) and RNA was isolated  
521 using RNeasy columns (Qiagen). RNA from *B. japonicum* was isolated with hot phenol. The washed  
522 and dried RNA was resuspended in 30 µl of ultrapure water. RNA concentration and purity was  
523 analyzed by measuring absorbance at 260 nm and 280 nm. 10% polyacrylamide-urea gels and  
524 staining with ethidium bromide were used to control the integrity of the isolated RNA. For qRT-PCR  
525 RNA, 10 µg samples were digested with 1 µl TURBO-DNase for 30 minutes to remove remaining  
526 DNA. PCR with *rpoB*-specific primers was performed for each sample, to check for residual DNA. The  
527 DNA-free RNA was then diluted to a concentration of 20 ng/µl for the qRT-PCR analysis.

### 528 **Northern Blot hybridization**

529 Total RNA (10 µg) was denatured in urea-formamide containing loading buffer at 65 °C, placed on ice  
530 and loaded on 1 mm thick, 20 x 20 cm, 10% polyacrylamide-urea gel. Separation by electrophoresis in  
531 TBE buffer was performed at 300 V for 4 h. Then the RNA was transferred to a positively charged  
532 nylon membrane for 2 h at 100 mA using a Semi-Dry Blotter. After crosslinking of the RNA to the  
533 membrane by UV light, the membrane was pre-hybridized for 2 h at 56 °C with a buffer containing 6x  
534 SSC, 2.5x Denhardtts solution, 1% SDS and 10 µg/ml Salmon Sperm DNA. Hybridization was  
535 performed with radioactively labeled oligonucleotides (see Table S3) in a solution containing 6x SSC,  
536 1% SDS, 10 µg/ml Salmon Sperm DNA for at least 6 h at 56 °C. The membranes were washed twice  
537 for 2 to 5 min in 0.01% SDS, 5x SSC at room temperature. Signal detection was performed with a  
538 BioRad molecular imager and the Quantity One (BioRad) software. For quantification, the intensity of  
539 the sRNA bands was normalized to the intensity of the 5S rRNA. For re-hybridization, membranes  
540 were stripped for 20 min at 96 °C in 0.1% SDS.

### 541 **Radioactive labeling of oligonucleotide probes**

542 5'-labeling of 10 pmol oligonucleotide was performed with 5 U T4 polynucleotide kinase (PNK) and 15  
543  $\mu\text{Ci}$  [ $\gamma$ - $^{32}\text{P}$ ]-ATP in a 10  $\mu\text{l}$  reaction mixture containing buffer A provided by the manufacturer. The  
544 reaction mixture was incubated for 60 min at 37 °C. After adding 30  $\mu\text{l}$  water, unincorporated  
545 nucleotides were removed using MicroSpin G-25 columns.

#### 546 **Reverse transcription PCR (RT-PCR) und real time, quantitative RT-PCR (qRT-PCR)**

547 For RT-PCR, first cDNA synthesis was performed with DNA-free RNA using the reverse primer. Then,  
548 PCR using both the forward and the reverse primers, was conducted. For analysis of relative steady  
549 state levels of specific RNAs by real time RT-PCR (qRT-PCR), the Brilliant III Ultra Fast SYBR®  
550 Green QRT-PCR Mastermix (Agilent) was used. Each 10  $\mu\text{l}$  reaction mixture contained 5  $\mu\text{l}$  Master  
551 Mix (supplied), 0.1  $\mu\text{l}$  DTT (100 mM; supplied), 0.5  $\mu\text{l}$  Ribo-Block solution (supplied), 0.4  $\mu\text{l}$  water, 1  $\mu\text{l}$   
552 of each primer (10 pmol/ $\mu\text{l}$ ), and 2  $\mu\text{l}$  RNA (20 ng/ $\mu\text{l}$ ). Routinely, first only the primer needed for cDNA  
553 synthesis was added to the reaction mixture. After cDNA synthesis and incubation for 10 min at 96 °C  
554 to inactivate the reverse transcriptase, the probes were cooled to 4 °C, the second primer was added,  
555 and PCR was performed starting with 5 min incubation at 96 °C. For one-step qRT-PCR (Fig. 3B),  
556 both primers were added simultaneously, before the cDNA synthesis step. Used primer pairs and their  
557 efficiencies (as determined by PCR using serial two-fold dilutions of RNA) are listed in Table S3. The  
558 qRT-PCR reaction was performed in a spectrofluorometric thermal cycler (Biorad). The quantification  
559 cycle (Cq), was set to a cycle at which the curvature of the amplification is maximal (Bustin et al.,  
560 2009). As a reference gene for determination of steady-state mRNA levels, *rpoB* (encodes the  $\beta$   
561 subunit of RNA polymerase) was used (Baumgardt et al., 2016). For half-life determination, it was  
562 necessary to use the stable 16S rRNA as a reference molecule. To achieve similar Cq of mRNA and  
563 16S rRNA, 2  $\mu\text{l}$  RNA with a concentration of 0.002 ng/ $\mu\text{l}$  was used in a 10  $\mu\text{l}$  reaction for real-time RT-  
564 PCR with 16S rRNA specific primers. Cq-values of genes of interest and the reference gene were  
565 used in the Pfaffl-formula to calculate fold changes of mRNA amounts (Pfaffl, 2001).

566 For qRT-PCR analysis of total RNA, the real-time PCR of the gene of interest (e.g. *rpmA*) and of the  
567 reference gene *rpoB* were performed using portions of the same DNA-free RNA sample. For qRT-  
568 PCR analysis of CoIP-RNA, the real-time RT-PCR of the gene of interest was performed using a  
569 CoIP-RNA sample, while total RNA of the same culture (harvested prior cell lysis for CoIP) was used  
570 for the *rpoB* real time RT-PCR.

#### 571 **qPCR**

572 To determine plasmid-DNA levels, qPCR with plasmid-specific primers (Table S3) and Power SYBR®  
573 PCR Mastermix were performed. The provided PCR master mix included all components necessary  
574 for performing real-time PCR except primers, template, and water, which were added as described for  
575 qRT-PCR. The qPCR reaction and quantification were performed like described for qRT-PCR analysis  
576 of total RNA.

#### 577 **Coimmunoprecipitation of RNA with 3xFLAG-peTrpL**

578 The strains containing the triple FLAG-tagged leader peptide *S. meliloti* 2011 (pSRKGm-3xFLAG-  
579 peTrpL, pRK4352), as well as the control *S. meliloti* 2011 (pSRKGm-peTrpL, pRK4352), were grown



580 in 1 l TY with Gm and Tc, before inducing them with 1 mM IPTG for 10 minutes at OD<sub>600</sub> of 0.5. Cell  
581 pellet was resuspended in 5 ml lysis buffer containing 20 mM Tris, pH of 7.5, 150 mM KCl, 1 mM  
582 MgCl<sub>2</sub>, 1 mM DTT, lysozyme, 2 µg/ml Tc and 1 pill protease inhibitor per 40 ml buffer. Cells were lysed  
583 by sonication and 40 µl anti-FLAG antibody-bound magnetic beads were added to the cleared lysate.  
584 After incubation at 4 °C for 2 h, the beads were collected and split into two portions. One sample was  
585 washed 3 times with 500 µl lysis buffer containing 2 µg/ml Tc, while the second sample was washed  
586 without tetracycline in the buffer. Purification of CoIP RNA was performed using TRIzol, without  
587 subsequent hot-phenol treatment.

## 588 **Computational analysis**

589 281 genomes of Rhizobiales were downloaded from GenBank (Benson et al., 2013) at August 2018.  
590 Intergenic regions of length 300 upstream of the gene *trpE* were extracted. We then considered all  
591 open reading frames containing at least two consecutive UGG codons and converted them into amino  
592 acid sequences of candidate leader peptides. The peptides were aligned using MUSCLE with default  
593 parameters (local alignment, open gap penalty –10, extend gap penalty –1) (Edgar, 2004). Hanging N-  
594 termini were trimmed manually, retaining the condition that candidate leader peptides should start with  
595 methionine. Phylogenetic trees were constructed based on the constructed distance matrix using R  
596 package “cluster” with default parameters (Maechler et al., 2018) by the Ward2 method (Murtagh and  
597 Legendre, 2014) and visualized using R package “ggplot2” (Wickham, 2016). Sequence logos were  
598 constructed using WebLogo (Crooks et al., 2004). The validity of predicted leader peptides was  
599 assessed by construction of alternative RNA secondary structures characteristic of attenuators using  
600 ad hoc Python scripts for the identification of overlapping RNA helices.

## 601 **Data availability**

602 The RNA-Seq and RIP-Seq data discussed in this publication have been deposited in NCBI's Gene  
603 Expression Omnibus (Edgar *et al.*, 2002); accession number GSE118689.

## 604 **Acknowledgments**

605 We thank Marta Robledo for helpful discussions and Janina Gerber for help in some experiments. The  
606 peTrpL computational analysis was initiated at the Summer School of Molecular and Theoretical  
607 Biology supported by the Zimin Foundation.

## 608 **Author contributions**

609 Conceptualization, E.E.H., H.M.; Methodology, E.E.H., H.M., S.M., Z.C.; Investigation, H.M., S.L., M.S.,  
610 S.M., R.S., S.A., S.B.W., A.S., K.B.; Formal analysis, H.M., S.L., M.S., K.U., S.M., A.S., Z.C., C.H.A.;  
611 Writing – Original Draft, E.E.H., H.M., J.Z.; Writing – Review and Editing, E.E.H., H.M., S.M., Z.C.,  
612 J.Z., C.H.A.; Visualization, E.E.H., H.M., M.S., S.L.; Supervision, E.E.H., Z.C.; Funding Acquisition,  
613 E.E.H.

## 614 **Funding**

615 This work was funded by DFG (EV42/6-1, Ev42/7-1 in SPP2002, GRK2355). S.L. was supported by  
616 the China Scholarship Council (No. 201708080082); Z.C. was supported by the Russian Science  
617 Foundation (18-14-00358).

#### 618 **Declaration of interests**

619 The authors declare no competing interests.

#### 620 **References**

- 621 Akiyama, T., Ishida, J., Nakagawa, S., Ogawara, H., Watanabe, S., Itoh, N., Shibuya, M., and Fukami,  
622 Y. (1987) Genistein, a specific inhibitor of tyrosine-specific protein kinases. *J. Biol. Chem.* 262, 5592-  
623 5595.
- 624 Andersson, D.I., and Hughes, D. (2014) Microbiological effects of sublethal levels of antibiotics. *Nat.*  
625 *Rev. Microbiol.* 12, 465-478.
- 626 Andrews, S.J., and Rothnagel, J.A. (2014) Emerging evidence for functional peptides encoded by  
627 short open reading frames. *Nat. Rev. Genet.* 15,193-204.
- 628 Bae, Y.M. and Crawford, I.P. (1990) The *Rhizobium meliloti trpE(G)* gene is regulated by attenuation,  
629 and its product, anthranilate synthase, is regulated by feedback inhibition. *J. Bacteriol.* 172, 3318-  
630 3327.
- 631 Baumgardt, K., Šmídová, K., Rahn, H., Lochnit, G., Robledo, M. and Evguenieva-Hackenberg, E.  
632 (2016) The stress-related, rhizobial small RNA RcsR1 destabilizes the autoinducer synthase encoding  
633 mRNA *sinI* in *Sinorhizobium meliloti*. *RNA Biol.*, 13, 486-499.
- 634 Benson, D.A., Cavanaugh, M., Clark, K., Karsch-Mizrachi, I., Lipman, D.J., Ostell, J., and Sayers,  
635 E.W. (2013) GenBank. *Nucleic Acids Res.* 41, D36-42.
- 636 Bohnert, J. A., Karamian, B., and Nikaido, H. (2010) Optimized Nile Red Efflux Assay of AcrAB-TolC  
637 Multidrug Efflux System Shows Competition between substrates. *Antimicrob. Agents. Chemother.* 54,  
638 37770-37775.
- 639 Bustin, S. A., Benes, V., Garson, J. A., Hellems, J., Huggett, J., Kubista, M., Mueller, R., Nolan, T.,  
640 Pfaffl, M. W., Shipley, G. L., et al. (2009) The MIQE guidelines: minimum information for publication of  
641 quantitative real-time PCR experiments. *Clin. Chem.* 55, 611-622.
- 642 Cabrera-Quio, L.E., Herberg, S., and Pauli, A. (2016) Decoding sORF translation - from small proteins  
643 to gene regulation. *RNA Biol.* 13, 1051-1059.
- 644 Casse, F., Boucher, C., Julliot, J.S., Michel, M. and Denarie, J. (1979) Identification and  
645 characterization of large plasmids in *Rhizobium meliloti* using agarose-gel electrophoresis. *Gen*  
646 *Microbiol.* 113, 229-242.
- 647 Chadani, Y., Niwa, T., Izumi, T., Sugata, N., Nagao, A., Suzuki, T., Chiba, S., Ito, K., and Taguchi, H.  
648 (2017) Intrinsic Ribosome Destabilization Underlies Translation and Provides an Organism with a  
649 Strategy of Environmental Sensing. *Mol. Cell* 68, 528-539.e5.

- 650 Crooks, G.E., Hon, G., Chandonia, J.M., and Brenner, S.E. (2004) WebLogo: A sequence logo  
651 generator, *Genome Research*, 14, 1188-1190
- 652 Dar, D., Shamir, M., Mellin, J.R., Koutero, M., Stern-Ginossar, N., Cossart, P., and Sorek, R. (2016)  
653 Term-seq reveals abundant ribo-regulation of antibiotics resistance in bacteria. *Science*  
654 352(6282):aad9822.
- 655 Dar, D., and Sorek, R. (2017) Regulation of antibiotic-resistance by non-coding RNAs in bacteria.  
656 *Curr. Opin. Microbiol.* 36, 111-117.
- 657 D'Costa, V.M., King, C.E., Kalan, L., Morar, M., Sung, W.W., Schwarz, C., Froese, D., Zazula, G.,  
658 Calmels, F., Debruyne, R., et al. (2011) Antibiotic resistance is ancient. *Nature*. 477, 457-461.
- 659 DebRoy S, Gebbie M, Ramesh A, Goodson JR, Cruz MR, van Hoof A, Winkler WC, and Garsin DA.  
660 (2014) Riboswitches. A riboswitch-containing sRNA controls gene expression by sequestration of a  
661 response regulator. *Science* 345, 937-940.
- 662 Eda, S., Mitsui, H., and Minamisawa, K. (2011) Involvement of the *smeAB* multidrug efflux pump in  
663 resistance to plant antimicrobials and contribution to nodulation competitiveness in *Sinorhizobium*  
664 *meliloti*. *Appl. Environ. Microbiol.* 77, 2855-2862.
- 665 Edgar, RC. (2004) MUSCLE: multiple sequence alignment with high accuracy and high throughput.  
666 *Nucleic Acids Res.* 32, 1792-1797.
- 667 Edgar, R., Domrachev, M., and Lash, A.E. (2002) Gene Expression Omnibus: NCBI gene expression  
668 and hybridization array data repository. *Nucleic Acids Res.* 30, 207-210.
- 669 Fischer HM, Babst M, Kaspar T, Acuna G, Arigoni F, Hennecke H.(1993) One member of a gro-ESL-  
670 like chaperonin multigene family in *Bradyrhizobium japonicum* is co-regulated with symbiotic nitrogen  
671 fixation genes. *EMBO J.* 12, 2901-2912.
- 672 Gaballa, A., Antelmann, H., Aguilar, C., Khakh, S., Song, K.B., Smaldone, G.T., and Helmann, J.D.  
673 (2008) The *Bacillus subtilis* iron-sparing response is mediated by a Fur-regulated small RNA and three  
674 small, basic proteins. *Proc. Natl. Acad. Sci. U. S. A.* 105, 11927-11932.
- 675 Jones, K.M., Kobayashi, H., Davies, B.W., Taga, M.E., and Walker, G.C. (2007) How rhizobial  
676 symbionts invade plants: the *Sinorhizobium-Medicago* model. *Nat. Rev. Microbiol.* 5, 619-633.
- 677 Hahn, J., Thalmann, S., Migur, A, von Boeselager, R.F., Kubatova, N., Kubareva, E., Schwalbe, H.,  
678 and Evguenieva-Hackenberg, E. (2017) Conserved small mRNA with an unique, extended Shine-  
679 Dalgarno sequence. *RNA Biol.* 14, 1353-1363.
- 680 Kereszt, A., Mergaert, P., Montiel, J., Endre, G., and Kondorosi, É. (2018) Impact of Plant Peptides on  
681 Symbiotic Nodule Development and Functioning. *Front. Plant Sci.* 9,1026.
- 682 Khan, S.R., Gaines, J., Roop, R.M. 2<sup>nd</sup>, and Farrand, S.K. (2008) Broad-host-range expression vectors  
683 with tightly regulated promoters and their use to examine the influence of TraR and TraM expression  
684 on Ti plasmid quorum sensing. *Appl. Environ. Microbiol.* 74, 5053-5062.

- 685 Kondo, T., Hashimoto, Y, Kato, K., Inagaki, S., Hayashi, S., and Kageyama, Y. (2007) Small peptide  
686 regulators of actin-based cell morphogenesis encoded by a polycistronic mRNA. *Nat. Cell. Biol.* 9,  
687 660–665.
- 688 Lau, C.H., Fraud, S., Jones, M., Peterson, S.N., and Poole, K. (2012) Reduced expression of the *rplU-*  
689 *rpmA* ribosomal protein operon in *mexXY*-expressing pan-aminoglycoside-resistant mutants of  
690 *Pseudomonas aeruginosa*. *Antimicrob. Agents. Chemother.* 56, 5171-5179.
- 691 Loh, E., Dussurget, O., Gripenland, J., Vaitkevicius, K., Tiensuu, T., Mandin, P., Repoila, F.,  
692 Buchrieser, C., Cossart, P., Johansson, J. (2009) A *trans*-acting riboswitch controls expression of the  
693 virulence regulator PrfA in *Listeria monocytogenes*. *Cell* 139,770-779.
- 694 Lovett, P.S., and Rogers, E.J. (1996) Ribosome regulation by the nascent peptide. *Microbiol Rev.* 60,  
695 366-385.
- 696 Maguire, B.A., Beniaminov, A.D, Ramu, H., Mankin, A.S., and Zimmermann R.A. (2005) A protein  
697 component at the heart of an RNA machine: the importance of protein I27 for the function of the  
698 bacterial ribosome. *Mol. Cell.* 20, 427-435.
- 699 Mank, N.N., Berghoff, B.A., Hermanns, Y.N., and Klug, G. (2012) Regulation of bacterial  
700 photosynthesis genes by the small noncoding RNA PcrZ. *Proc. Natl. Acad. Sci. U. S. A.* 109, 16306-  
701 11631.
- 702 Maechler, M., Rousseeuw, P., Struyf, A., Hubert, M., Hornik, K. (2018). *cluster: Cluster Analysis*  
703 *Basics and Extensions*. R package version 2.0.7-1.
- 704 McIntosh, M., Krol, E., and Becker, A. (2008) Competitive and Cooperative Effects in Quorum-  
705 Sensing-Regulated Galactoglucan Biosynthesis in *Sinorhizobium meliloti*. *J. Bacteriol.* 190, 5308-  
706 5317.
- 707 Melior, H., Li, S., Madhugiri, R., Stötzel, M., Azarderakhsh, S., Barth-Weber, S., Baumgardt, K.,  
708 Ziebuhr, J., Evguenieva-Hackenberg, E. (2019) Transcription attenuation-derived small RNA rTrpL  
709 regulates tryptophan biosynthesis gene expression in *trans*. *Nucleic Acids Res.*, in press.
- 710 Merino, E., Jensen, R.A., and Yanofsky, C. (2008) Evolution of bacterial *trp* operons and their regulation.  
711 *Curr. Opin. Microbiol.*, 11, 78-86.
- 712 Murtagh, F., and Legendre, P. (2014) Ward's hierarchical agglomerative clustering method: which  
713 algorithms implement Ward's criterion? *Journal of Classification*, 31, 274-295.
- 714 Nelson, M.L., and Levy, S.B. (2011) The history of the tetracyclines. *Ann. N. Y. Acad. Sci.* (2011)  
715 1241, 17-32.
- 716 Omasits, U., Varadarajan, A.R., Schmid, M., Goetze, S., Melidis, D., Bourqui, M., Nikolayeva, O.,  
717 Québatte, M., Patrignani, A., Dehio, C., et al. (2017) An integrative strategy to identify the entire  
718 protein coding potential of prokaryotic genomes by proteogenomics. *Genome Res.* 27, 2083-2095.
- 719 Park, S.Y., Cromie, M.J., Lee, E.J., and Groisman, E.A. (2010) A bacterial mRNA leader that employs  
720 different mechanisms to sense disparate intracellular signals. *Cell* 142,737-748.

- 721 Park, H., McGibbon, L.C., Potts, A.H., Yakhnin, H., Romeo, T., and Babitzke, P. (2017) Translational  
722 Repression of the RpoS Antiadapter IraD by CsrA Is Mediated via Translational Coupling to a Short  
723 Upstream Open Reading Frame. *MBio.* 8. pii: e01355-17.
- 724 Pfaffl, M.W. (2001) A new mathematical model for relative quantification in real-time RT-PCR. *Nucleic*  
725 *Acids Res.* 29, e45.
- 726 Regensburger, B. and Hennecke, H. (1983) RNA polymerase from *Rhizobium japonicum*. *Arch.*  
727 *Microbiol.*, 135, 103-109.
- 728 Sambrook, J., Fritsch, E.F., Maniatis, T. (1989) *Molecular cloning: A laboratory manual.* 2. Cold Spring  
729 Harbor Laboratory Press, Cold Spring Harbor, NY.
- 730 Schäfer, A., Tauch, A., Jäger, W., Kalinowski, J., Thierbach, G., and Pühler, A. (1994) Small  
731 mobilizable multi-purpose cloning vectors derived from the *Escherichia coli* plasmids pK18 and pK19:  
732 selection of defined deletions in the chromosome of *Corynebacterium glutamicum*. *Gene* 145, 69-73.
- 733 Schlüter, J.P., Reinkensmeier, J., Daschkey, S., Evguenieva-Hackenberg, E., Janssen, S., Jänicke,  
734 S., Becker, J.D., Giegerich, R., Becker, A. (2010) A genome-wide survey of sRNAs in the symbiotic  
735 nitrogen-fixing alpha-proteobacterium *Sinorhizobium meliloti*. *BMC Genomics* 2010 11, 245.
- 736 Schlüter, J.P., Czuppon, P., Schauer, O., Pfaffelhuber, P., McIntosh, M., and Becker, A. (2015)  
737 Classification of phenotypic subpopulations in isogenic bacterial cultures by triple promoter probing at  
738 single cell level. *J Biotechnol.* 198, 3-14.
- 739 Simon, R., Prierer, U., and Pühler, A. (1983) A broad host range mobilization system for in vivo genetic  
740 engineering: transposon mutagenesis in Gram negative bacteria. *Bio-Technology* 1, 784-791.
- 741 Storz, G., Wolf, Y.I., Ramamurthi, K.S. (2014) Small proteins can no longer be ignored. *Annu. Rev.*  
742 *Biochem.* 83, 753-777.
- 743 Terán, W., Krell, T., Ramos, J., L., and Gallegos, M., T. (2006) Effector-repressor interactions, binding  
744 of a single effector molecule to the operator-bound TtgR homodimer mediates derepression. *J. Biol*  
745 *Chem.* 281, 7102-7109.
- 746 Vitreschak, A.G., Lyubetskaya, E.V., Shirshin, M.A., Gelfand, M.S., and Lyubetsky, V.A. (2004)  
747 Attenuation regulation of amino acid biosynthetic operons in proteobacteria: comparative genomics  
748 analysis. *FEMS Microbiol. Lett.*, 234, 357-370.
- 749 Waters, L.S., and Storz, G. (2009) Regulatory RNAs in bacteria. *Cell* 136, 615-628.
- 750 Weaver, J., Mohammad, F., Buskirk, A.R., Storz, G. (2019) Identifying Small Proteins by Ribosome  
751 Profiling with Stalled Initiation Complexes. *MBio.* 10, pii: e02819-18.
- 752 Wickham H. (2016) *ggplot2: Elegant Graphics for Data Analysis.* Springer-Verlag New York,
- 753 Yanofsky C. (1981) Attenuation in the control of expression of bacterial operons. *Nature* 289, 751-758.
- 754 Yin, X., Wu Orr, M., Wang, H., Hobbs, E.C., Shabalina, S.A, and Storz G. (2019) The small protein  
755 MgtS and small RNA MgrR modulate the PitA phosphate symporter to boost intracellular magnesium  
756 levels. *Mol. Microbiol* 111, 131–144.

757 Zahn, K. (1996) Overexpression of an mRNA dependent on rare codons inhibits protein synthesis and  
758 cell growth. *J. Bacteriol.* 178, 2926-2933.

759 Zurawski, G., Elseviers, D., Stauffer, G.V., Yanofsky, C. (1978) Translational control of transcription  
760 termination at the attenuator of the *Escherichia coli* tryptophan operon. *Proc. Natl. Acad. Sci. U. S. A.*  
761 75, 5988-92.

762

## 763 **Figure legends**

764 **Figure 1. The attenuator sRNA rnTrpL requires the leader peptide peTrpL and tetracycline for**  
765 **down-regulation of *rplUrpmA* mRNA. A)** Schematic representation of the *S. meliloti trpLE(G)* locus.  
766 The *trpL* and *trpE(G)* ORFs (gray arrows), a RpoD-like promoter (gray rectangle), the transcription  
767 start site (flexed arrow) and the transcription terminator (hairpin) are depicted (according to Bae and  
768 Crawford, 1990). **B) C), D), and F)**, Log<sub>2</sub> fold changes (log<sub>2</sub>FC) in *rpmA* mRNA levels determined by  
769 qRT-PCR are shown. Each graph contains data from three independent experiments, each performed  
770 in duplicates. Means with standard deviations (SD)s are indicated. **B)** Cultures of strain 2011  
771 containing the indicated plasmids were analyzed. Bar C on the left, the *rpmA* level in the constitutively  
772 overexpressing strain 2011(pRK-rnTrpL) was compared to that in the EVC. All other bars show  
773 comparisons of the *rpmA* levels at the indicated times post induction (min IPTG) with the levels before  
774 induction. Presence of pRK4352 and Tc (20 µg/ml) is indicated. **C)** Cultures of strain 2011Δ*trpL*  
775 containing the indicated plasmids and grown with Gm and Tc were analyzed. Changes in the *rpmA*  
776 levels 10 min post induction with IPTG were compared to those before induction. As shown below the  
777 graph, pSRKGm-rnTrpL leads to production of peTrpL (peptide) and the sRNA lacZ'-rnTrpL (sRNA),  
778 while pSRKGm-peTrpL leads to the production of the peptide only. **D)** Cultures of strain 2011Δ*trpL*  
779 containing the indicated plasmids were analyzed. Induced production of peTrpL (peptide) and/or  
780 constitutive production of the rnTrpL derivative rnTrpL-AU1,2UA containing an inactivated *trpL* sORF  
781 (sRNA) is indicated. For other descriptions see panel C). **E)** Schematic representation of the  
782 experiment aiming to detect a short-term effect of Tc on *rpmA* expression in strain 2011Δ*trpL*  
783 (pSRKGm-rnTrpL, pRK4352). The culture was grown first in medium with Gm and Tc. Then, the strain  
784 was grown for 4 h without Tc, IPTG was added and, 10 min later, Tc was also added. RNA was  
785 isolated at the indicated time points and the *rpmA* levels at the time points 10 and 20 min were  
786 compared to the level at the time point 0 (marked with arrows and asterisks). **F)** qRT-PCR analysis of  
787 changes in the *rpmA* level upon induction of lacZ'-rnTrpL transcription and/or exposure to Tc (see  
788 panel E and its description). Additionally, suitable controls were conducted: cultures were exposed to  
789 IPTG only, Tc only or to a combination of both compounds for the indicated times (min).

790

791 **Figure 2. rnTrpL directly base-pairs with *rplU* and destabilizes the bicistronic *rplUrpmA* mRNA.**  
792 **A)** Scheme of the *rplUrpmA* operon and the duplex structure predicted to be formed between *rplU*  
793 (mRNA) and rnTrpL (sRNA) ( $\Delta G = -11.54$  kcal/mol). **B)** Analysis of possible base-pairing interactions  
794 between lacZ'-rnTrpL and the fusion mRNA *rplUrpmA*::*egfp* in strain 2011Δ*trpL*. The plasmids used in  
795 this experiment are indicated. Cultures were grown with Gm and Tc, and fluorescence was measured

796 20 min after IPTG addition. The fluorescence of strain 2011 $\Delta$ *trpL* (pSRKGm-rplUrpmA'-egfp, pSRKTc)  
797 was set to 100 % and used for normalization. **C**) Determination of the half-lives of *rpmA* and (as a  
798 negative control) *rpoB* mRNA in strain 2011 $\Delta$ *trpL* (pSRKTc-rnTrpL) grown with Tc. 10 min after  
799 induction of rnTrpL transcription by IPTG, rifampicin (Rf) was added to stop cellular transcription. In  
800 parallel, a non-induced culture was treated with Rf. At the time points 0, 2, 4 and 6 min after Rf  
801 addition, RNA was isolated and analyzed by qRT-PCR. The mRNA level at time point 0 (before Rf  
802 addition) was set to 100%, the relative mRNA level values were plotted against the time, and the  
803 mRNA half-lives were calculated. Shown are the results from three independent transcription inhibition  
804 experiments. The qRT-PCRs reactions were performed in technical duplicates (means with SDs are  
805 indicated).

806

807 **Figure 3. Tc-dependent CoIP of RNAs with 3xFLAG-peTrpL reveals a new target and antisense**  
808 **mechanism. A)** The 3xFLAG-peTrpL retained functionality. Shown is a qRT-PCR analysis of changes  
809 in *rpmA* levels at 10 min post induction of peTrpL or 3xFLAG-peTrpL production in strains  
810 2011(pSRKGm-peTrpL, pRK4352) and 2011(pSRKGm-3xFLAG-peTrpL, pRK4352), respectively. The  
811 cultures were grown with Gm and Tc. **B)** Enrichment of the indicated RNAs in the 3xFLAG-peTrpL  
812 CoIP samples, in comparison to the control, mock CoIP conducted with the peTrpL-containing lysate.  
813 One-step qRT-PCR was performed. The presence of Tc in the washing buffer is indicated. Shown are  
814 the results from three independent experiments, each performed in duplicates (means with SDs are  
815 indicated). **C)** RNAseq analysis revealed sense (se) and antisense (as) RNA of rnTrp, *rplUrpmA* and  
816 *smeR* in the 3xFLAG-peTrpL CoIP samples. Only RNA retained on the beads after washing with a Tc-  
817 containing buffer was sequenced, along with total RNA of strain 2011 grown under similar conditions,  
818 but without Gm and Tc. Shown is an IGB view of mapped cRNA reads. Annotated ORFs or transcripts  
819 are indicated.

820

821 **Figure 4. peTrpL is involved in in the regulation of the multidrug efflux pump operon *smeABR*.**  
822 **A)** qRT-PCR analysis of *smeR* in strain 2011 $\Delta$ *trpL* containing the indicated plasmids. Changes in the  
823 mRNA level 10 min post IPTG addition were determined. Co-transformation of pRK4352 and presence  
824 of Tc in the growth medium is also indicated (compare to Fig. 1B and 1C). **B)** *smeR* mRNA half-lives in  
825 2011 $\Delta$ *trpL* (pSRKTc-rnTrpL) cultures induced or non-induced with IPTG for 10 min. For details, see  
826 Fig. 2C. **C)** qRT-PCR analysis of *smeA* mRNA. Time of peTrpL or rnTrpL induction by IPTG is  
827 indicated. For other details, see panel A). **D)** Co-transcription of *smeB* and *smeR* revealed by RT-PCR  
828 analysis of strain 2011 $\Delta$ *trpL*, 10 min after addition of 1.5  $\mu$ g/ml Tc. **E)** qRT-PCR analysis of the  
829 reporter *egfp* mRNA, transcribed from plasmid pSUP-PasRegfp (see Fig. S1). The *egfp* mRNA level  
830 10 min after addition of Tc (10  $\mu$ g/ml) or one of the indicated antimicrobial substances (applied at  
831 subinhibitory concentrations: Em, 27  $\mu$ g/ml, Cl, 9  $\mu$ g/ml;Gs, 90  $\mu$ g/ml; Rf, 3  $\mu$ g/ml; Lt, 40  $\mu$ g/ml, Km, 45  
832  $\mu$ g/ml) was compared to the level before addition. Data shown in the graphs were obtained from three  
833 independent experiments, each performed in technical duplicates (means and SDs are indicated). **F)**  
834 Current model for regulation of the *smeABR* operon. Exposure to SmeR-effectors relieves the  
835 *smeABR* repression by SmeR at the P<sub>se</sub> promoter and leads to induction of asRNA transcription at the

836  $P_{as}$  promoter. We postulate that the asRNA As-smeR and the peptide pTrpL are involved in the  
837 accelerated decay of the *smeR* part of the *smeABR* transcript. This posttranscriptional regulation  
838 results in increased production of the multidrug efflux pump SmeAB.

839

840 **Figure 5. The peptide peTrpL increases the resistance to multiple antimicrobial substances.**

841 Unless stated otherwise (see panel D), the deletion mutant 2011 $\Delta$ *trpL* was used for the experiments  
842 shown in this figure. **A)** Zones of growth inhibition showing increased resistance to Tc upon induced  
843 peTrpL production. Plasmids and presence of IPTG in the growth medium are indicated.  
844 Representative plates are shown. **B)** Graphic representation of the results from the experiment shown  
845 in A). **C)** and **D)** Graphs showing the OD<sub>600</sub> values reached in 96-well plates at 14 hours post  
846 inoculation at an OD<sub>600</sub> of 0.1. In B, C) and D), data from three independent experiments were  
847 included in the analysis. Shown are means and SDs. **C)** Ectopically expressed peTrpL increases the  
848 bacterial resistance to Tc (0.2  $\mu$ g/ml). Plasmids and presence of IPTG in the medium are indicated. **D)**  
849 Strain 2011 grows better than the deletion mutant 2011 $\Delta$ *trpL* at a subinhibitory Tc concentration.  
850 Strains and Tc concentrations are indicated. **E)** NileRed efflux assay for determination of the efflux  
851 activity in the presence or absence of peTrpL production. Plasmids used and addition of IPTG are  
852 indicated. 1.5  $\mu$ g/ml Tc was added to the cultures. The NileRed dye generates a fluorescence signal  
853 only if present in the cell. Fast decline of fluorescence over time correlates with high efflux pump  
854 activity. Data of a representative experiment is shown. **F)** Production of peTrpL increases the MICs of  
855 Cl, Em, Rf and Gs, but not of Km and Lt. Culture of strain 2011 $\Delta$ *trpL* (pSRKGm-peTrpL) was diluted to  
856 an OD<sub>600</sub> of 0.1 and grown for 60 h in 96-well plates. Concentrations of the antimicrobial compounds  
857 used in the respective experiments are given above the panels. Presence of IPTG in the medium and  
858 MICs are indicated on the left side. Shown is one representative result of three independent  
859 experiments.

860

861 **Figure 6. Gene regulation in *trans* by two different, peTrpL-dependent pathways, and**  
862 **generation of the sRNA rnTrpL in response to translation inhibition** **A)** Differential downregulation

863 of *rplUrpmA* and/or *smeR* in strain 2011 upon addition of the indicated antimicrobial compounds at  
864 subinhibitory concentrations (see Fig. 4E). Changes in the levels of the indicated mRNAs 10 min after  
865 exposure to the antimicrobials were determined by qRT-PCR. *trpE* was used as a negative control.  
866 See also Fig. S5. **B)** Selective ColP of 3xFLAG-peTrpL with *smeR* and/or *rplUrpmA*, the latter  
867 together with rnTrpL, in the presence of different antimicrobial compounds, which were used at the  
868 subinhibitory concentrations indicated in Fig. 4E. One half of the beads was washed with a buffer  
869 containing Km, Cl or Gs, respectively, while the other half was washed with an antimicrobials-free  
870 buffer. Only one of the negative controls (beads washed with buffer devoid of antimicrobials) is  
871 presented. For details, see Fig 3B. The graphs show results from three independent experiments,  
872 each performed in duplicates (means with SDs are indicated). **C)** Northern blot analysis of strain  
873 2011 $\Delta$ *trpC* demonstrating the accumulation of rnTrpL as a consequence of transcription termination  
874 upon exposure to Tc, under conditions of Trp insufficiency. A schematic representation of the  
875 experiment is shown above the hybridization panels. 30  $\mu$ g total RNA was loaded in each lane, except



876 for lane 1 in which 10  $\mu$ g RNA was loaded. First, a probe directed against rnTrpL was used and, then,  
877 the membrane was re-hybridized with the 5S rRNA-specific probe (loading control). High Trp  
878 conditions, 20  $\mu$ g/ml Trp in the minimal medium; Low Trp conditions, 2  $\mu$ g/ml Trp in the minimal  
879 medium. Detected RNAs are indicated. **D)** Model for posttranscriptional regulation of *rplUrpmA* by  
880 rnTrpL generation at conditions of translation inhibition, even under conditions of Trp shortage. Based  
881 on our data, we propose that double-stranded RNA, base pairing between rnTrpL and *rplU*, peTrpL  
882 and the presence of a translation-inhibiting antibiotic, such as Tc or Cl, are involved in this  
883 posttranscriptional regulation.

884

885 **Figure 7. Role of peTrpL in multiresistance is conserved in Rhizobiales despite high**  
886 **divergence in primary structure. A)** Analysis of changes in the mRNA levels of *rpmA* and the  
887 respective *smeR* homolog upon overproduction of corresponding rnTrpL homologs in *A. tumefaciens*  
888 and *B. japonicum*. Plasmid pSRKGm-Atu-rnTrpL was used to induce Atu-rnTrpL production for 10 min.  
889 mRNA Levels after induction were compared to those before induction. Due to the lack of a suitable  
890 inducible system for *B. japonicum*, Bja-rnTrpL was overproduced constitutively from the  
891 chromosomally integrated, Tc-resistance-conferring plasmid pRJ-Bja-rnTrpL. **B)** The MIC of Tc for *A.*  
892 *tumefaciens* was increased upon induced overproduction of Atu-peTrpL from plasmid pSRKGm-Atu-  
893 peTrpL. **C)** Constitutive overproduction of Bja-peTrpL enables *B. japonicum* growth in a liquid medium  
894 containing 100  $\mu$ g/ml Tc, while growth of the control strain containing the empty vector pRJ-MCS was  
895 inhibited at this Tc concentration. **D)** Sequence logos for peTrpL of the *Sinorhizobium*, *Agrobacterium*  
896 and *Bradyrhizobium* groups (see Fig. S7). **E)** Alanine scanning mutagenesis for analysis of functionally  
897 important residues in peTrpL of *S. meliloti*. Changes in the levels of *rpmA* and *smeR* were determined  
898 by qRT-PCR 10 min after addition of IPTG to induce the overproduction of peTrpL variants with the  
899 indicated aa exchanges in strain 2011. As EVC, bacteria cotransformed with pSRKGm and pRK4352  
900 were used, while the strains used to overproduce wt peTrpL (or one of its variants with aa exchanges)  
901 were cotransformed with pSRKGm-peTrpL (or one of its mutated derivatives) and pRK4352. All  
902 cultures were grown with Gm and Tc. Shown are the results from three independent experiments,  
903 each performed in duplicates (means with SDs are indicated).

# Figure 1

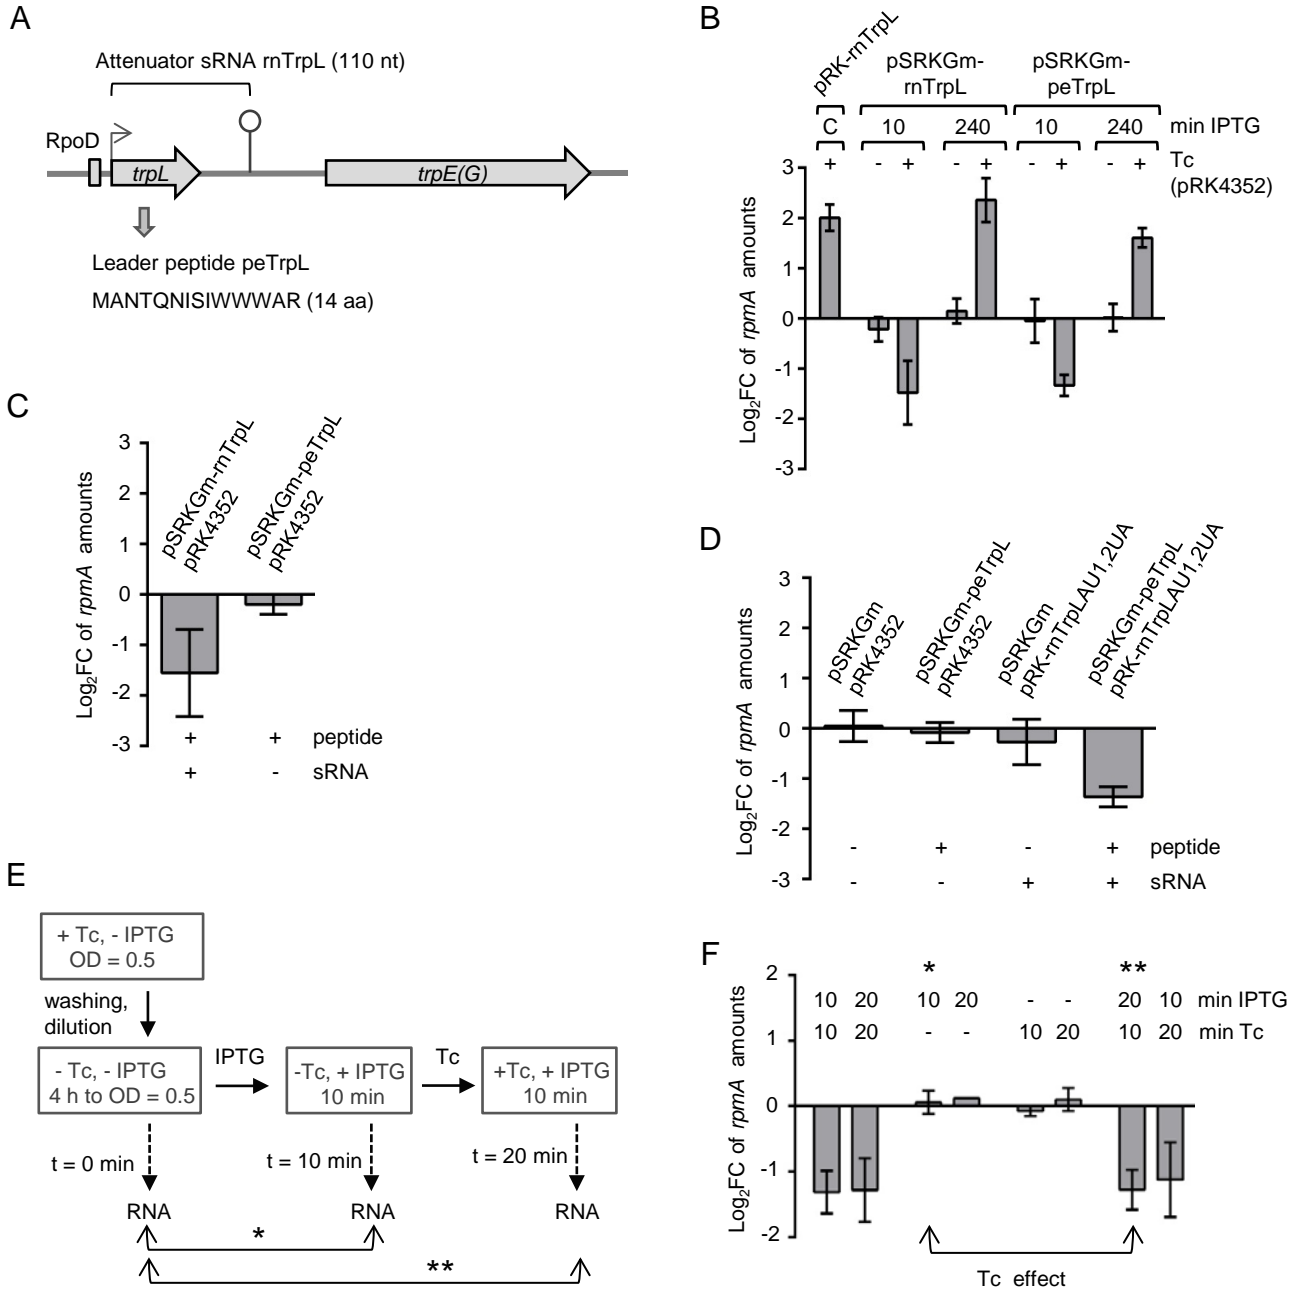

**Figure 2**

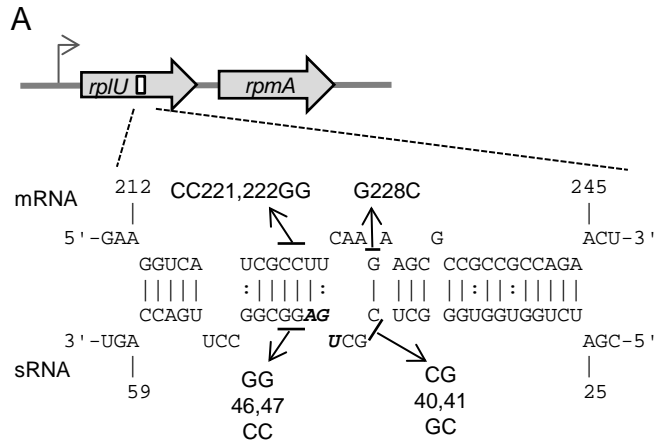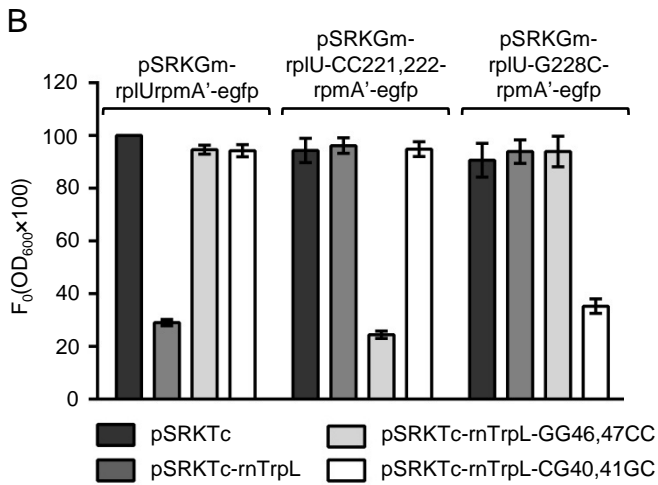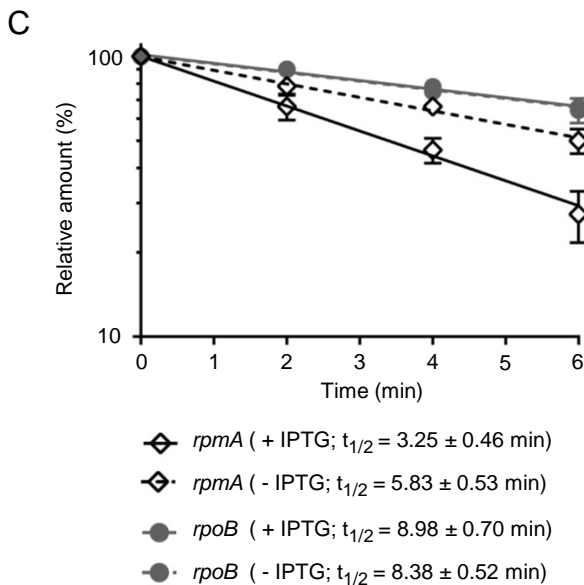

# Figure 3

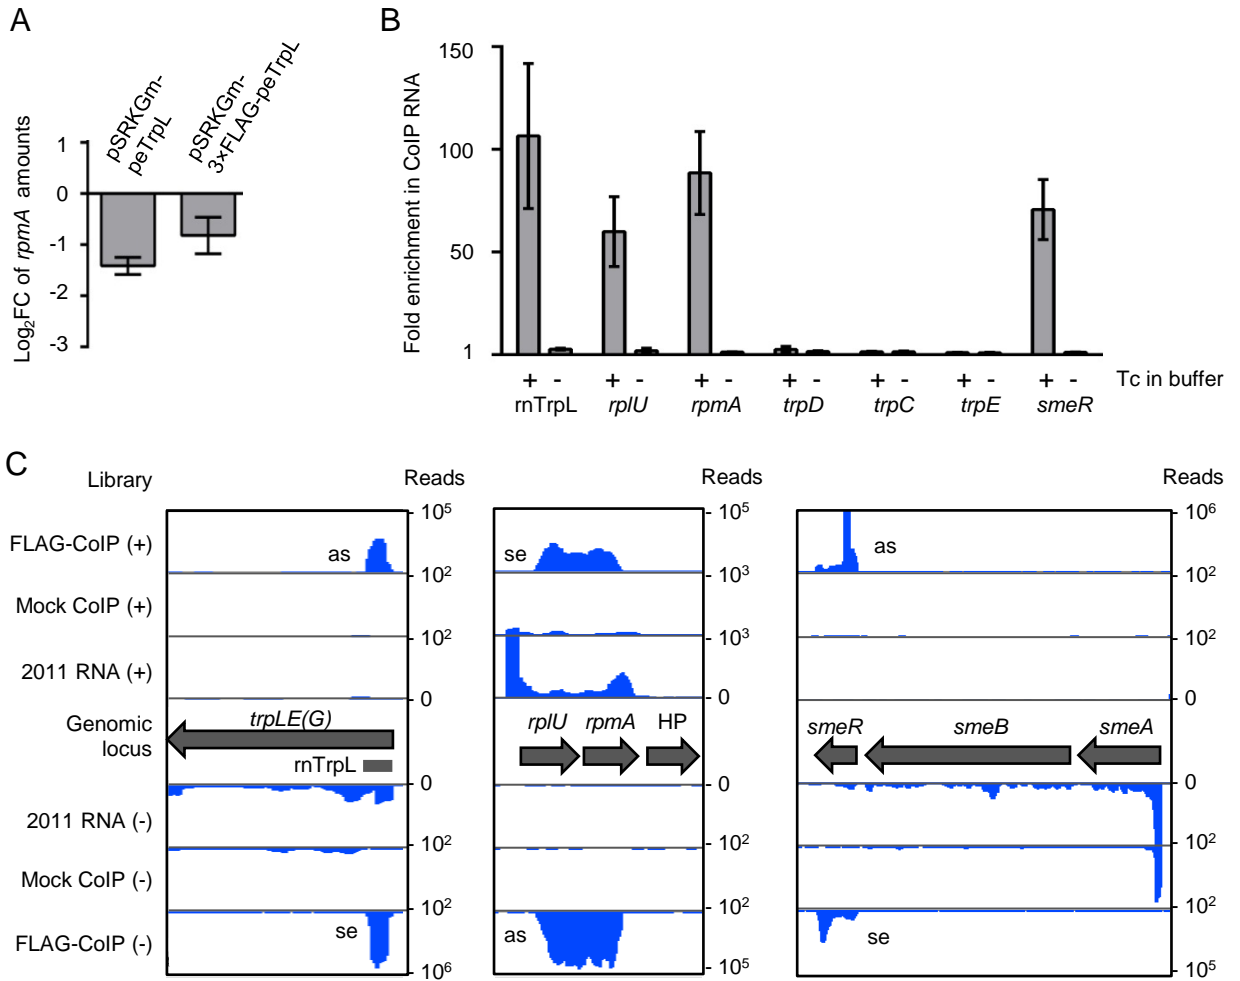

# Figure 4

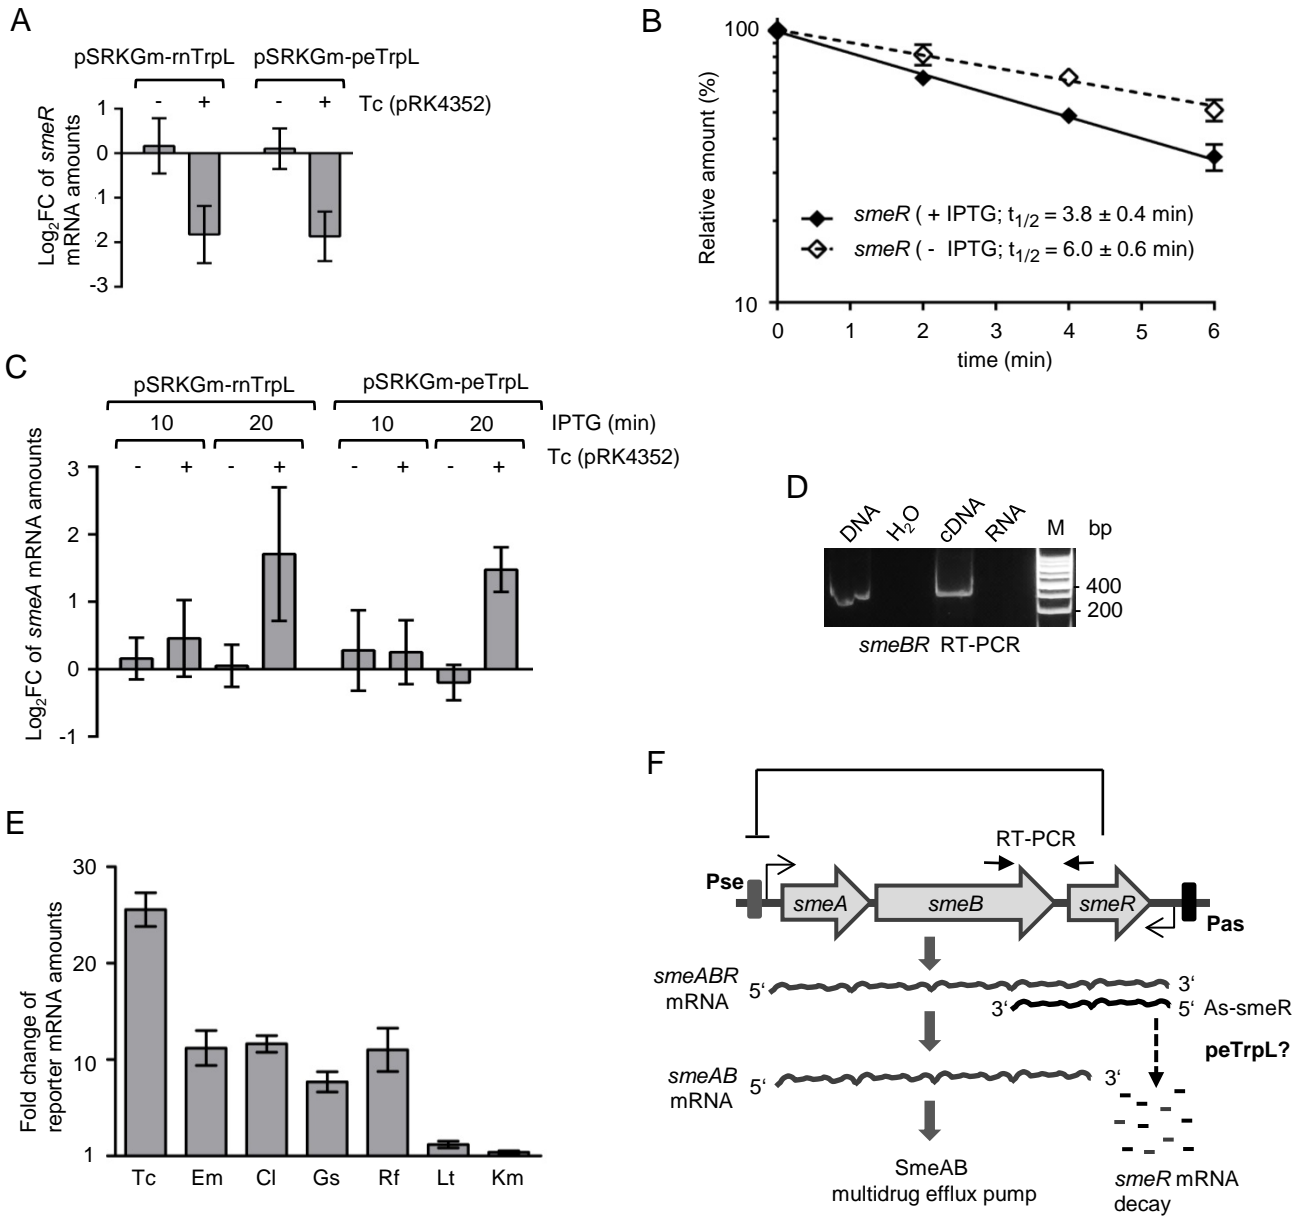

# Figure 5

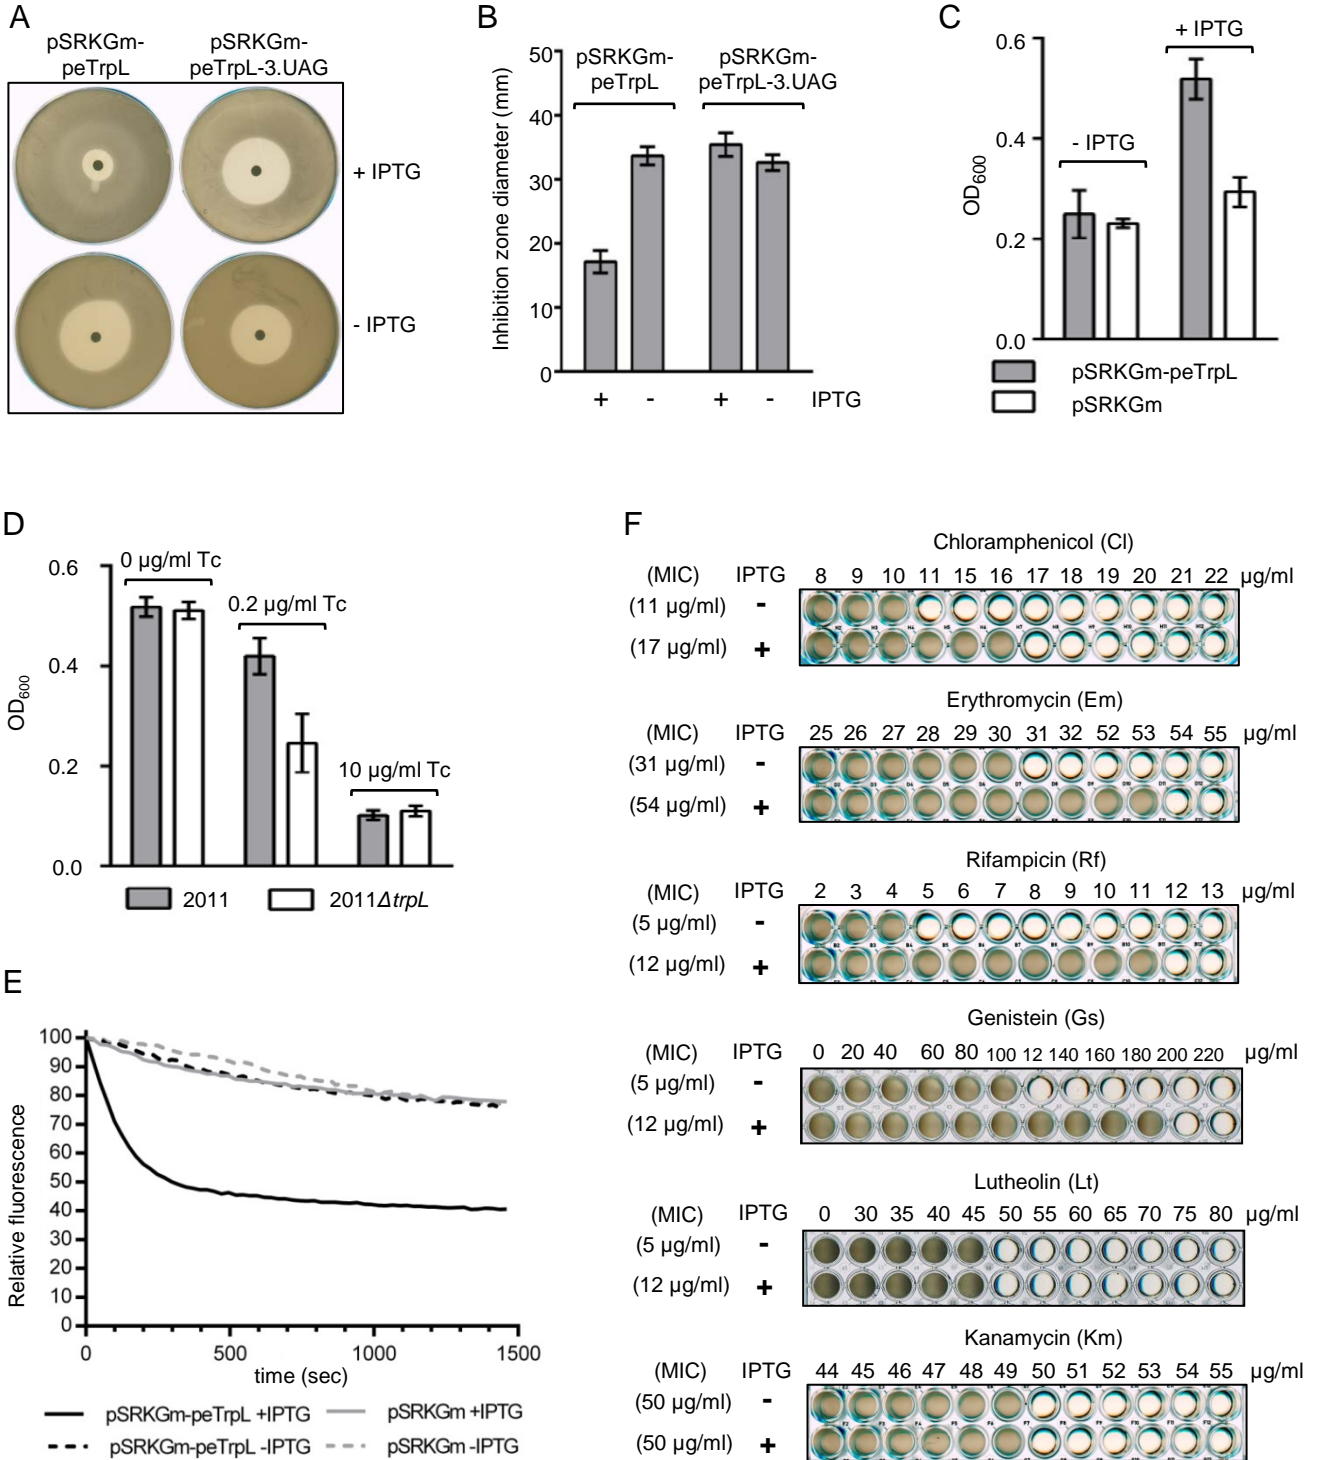

# Figure 6

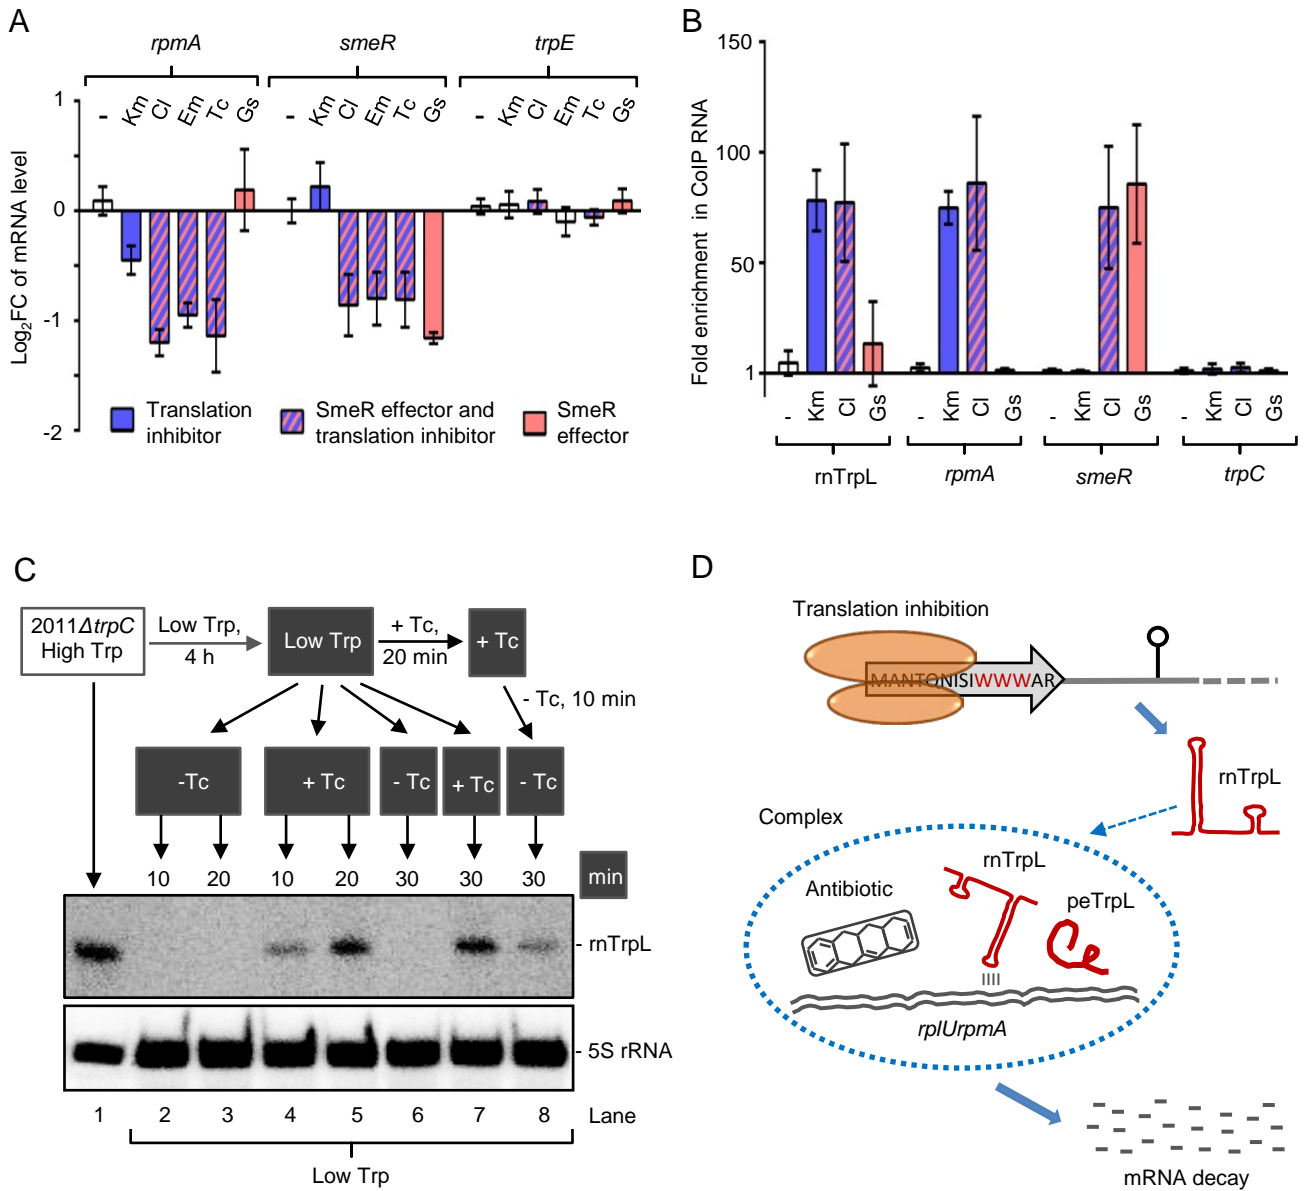

# Figure 7

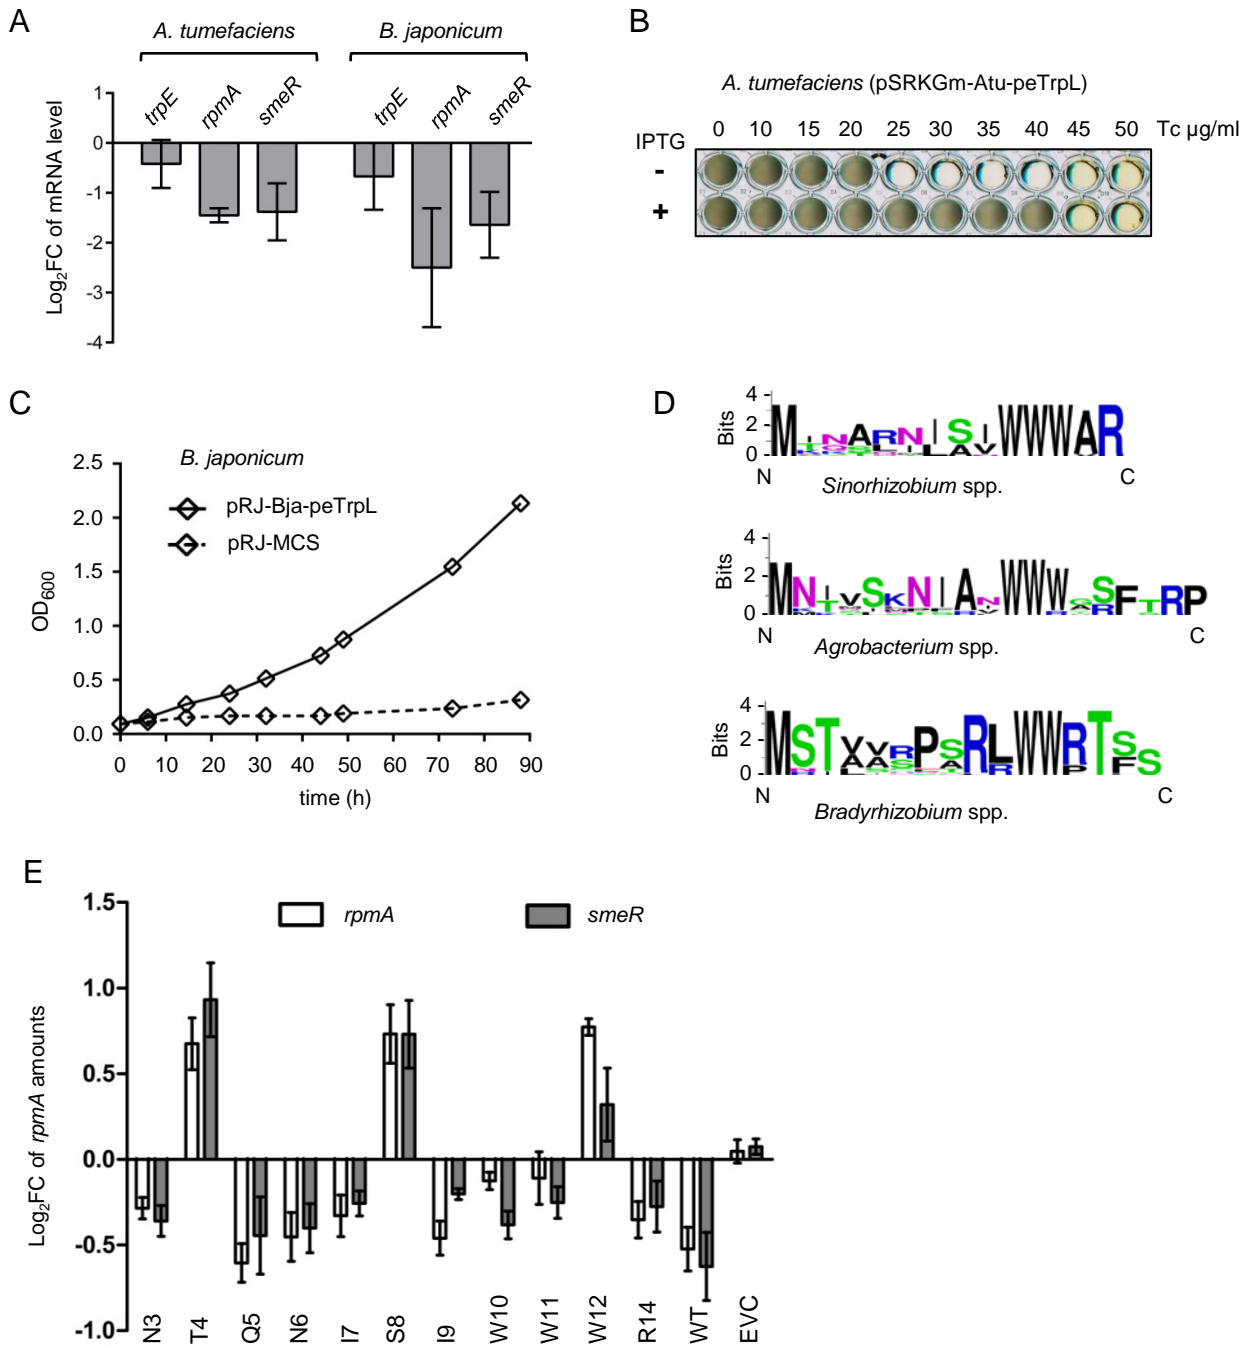

Source: https://www.biorxiv.org/content/10.1101/606483v1.full.pdf
