# Supplementary material for: The bacterial leader peptide peTrpL has a conserved function in antibiotic-dependent posttranscriptional regulation of ribosomal genes
Source: bioRxiv or medRxiv preprint supplement (doi:10.1101/606483), 2019-09-26
Supplement: Supplementary file [file media-1.pdf]

# Figure S1

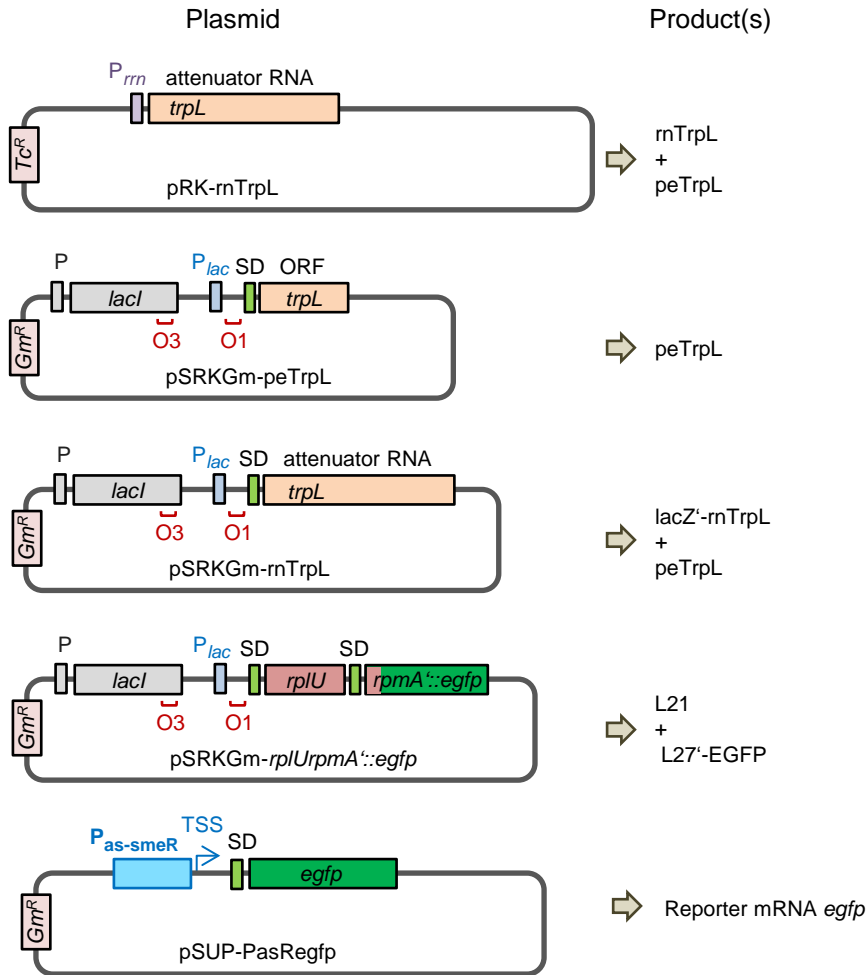

**Figure S1. Plasmids for overexpression of rnTrpL and for *egfp* reporter.** Schematic representations of the indicated plasmids. In addition to the here shown pSRKGm plasmids with a Gm resistance gene, pSRKTc plasmids with a Tc resistance gene were also used for induced rnTrpL and/or peTrpL expression. The *rplUrpmA::egfp* fusion contains the first three *rpmA* codons fused to the third *egfp* codon. In pSUP-PasRegfp, the genomic region containing the promoter of the asRNA As-smeR and the putative two first nucleotides if the asRNA were fused to a sequence containing a standard Shine-Dalgarno ribosome binding site, followed by the *egfp* gene. Mutations in the constructs are not shown here. P, promoter; O, operator; SD, Shine-Dalgarno sequence. Relevant genes, gene products and regulatory elements are indicated.

# Figure S2

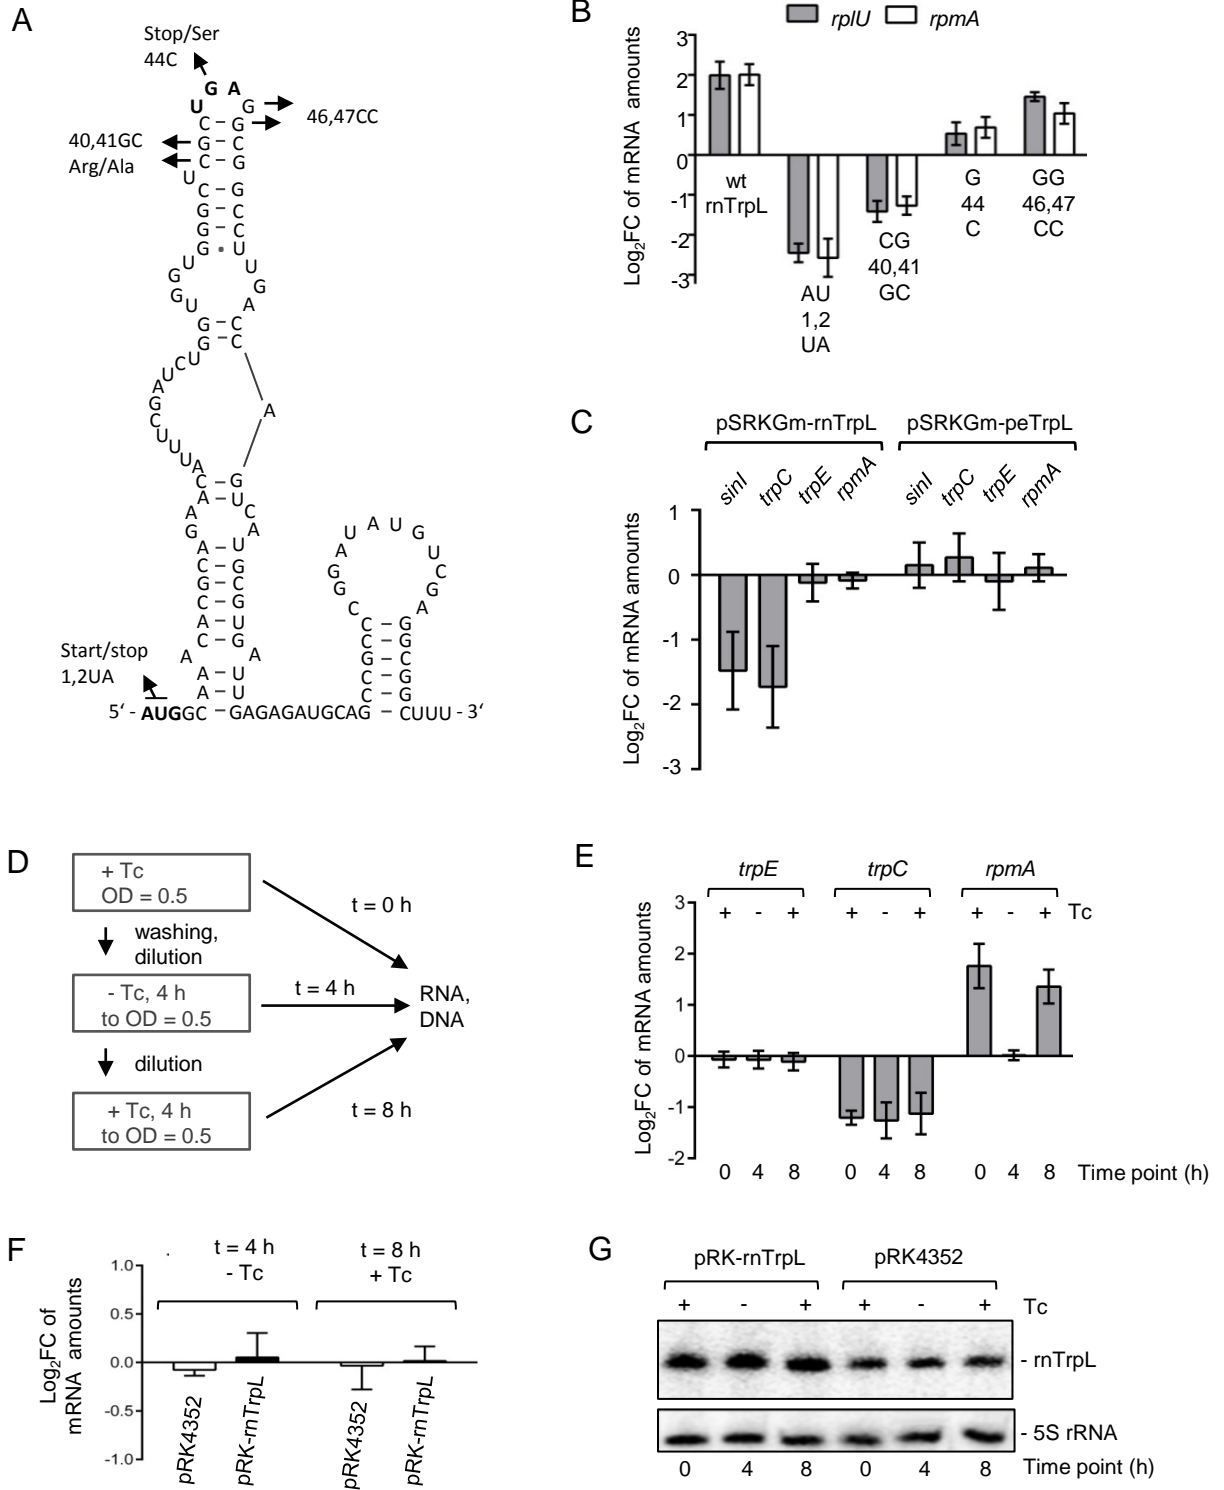

**Figure S2. Effects of rnTrpL and Tc on mRNA levels.** **A)** Secondary structure of the sRNA rnTrpL (drawn according to Melior et al., 2019) with indicated mutations. **B), C), and E)** show qRT-PCR and **F)** shows qPCR results (means and standard deviations from three independent experiments, each performed in duplicates). **B)** Constitutive rnTrpL overproduction in strain 2011 (pRK-rnTrpL), grown with Tc, increased the *rplUrpmA* mRNA level (in comparison to the EVC). The strong effect of the start to stop codon mutation in *trpL* suggested a function for peTrpL in the regulation of *rplUrpmA*. **C)** Influence of the induced rnTrpL and/or peTrpL overproduction on the levels of the indicated mRNAs. Strain 2011 harboring one of the indicated plasmids was used; the cultures were grown with gentamycin (Gm). The mRNA levels, 10 min post induction with IPTG, were compared to those before induction. In contrast to our expectations, no effect on *rpmA* was detected, although the levels of the control mRNAs *trpC* and *sinI* were decreased (Baumgardt et al., 2016; Melior et al., 2019), confirming the functionality of the sRNA lacZ'-rnTrpL in this experiment. Panels **D)** to **G)** show an experiment addressing the effect of Tc in strain 2011 (pRK-rnTrpL) and the EVC 2011 (pRK4352). **D)** Scheme of the experiment. **E)** The levels of the indicated mRNAs in the overexpressing strain were compared to the levels in the EVC. RNA samples isolated at the indicated time points (see panel **D)**) were used. **F)** Plasmid level per chromosome was not changed during the experiment. 4 h – Tc, relative plasmid level at time point 4 h was compared to the level at time point 0 h; 8 h + Tc, relative plasmid level at time point 8 h was compared to the level at time point 0 h. **G)** The steady-state level of rnTrpL was not changed during the Tc-removal experiment, as shown by Northern blot hybridization. Used plasmid and time point of RNA isolation are indicated. The membrane was re-probed with a 5S rRNA specific probe (loading control) .

# Figure S3

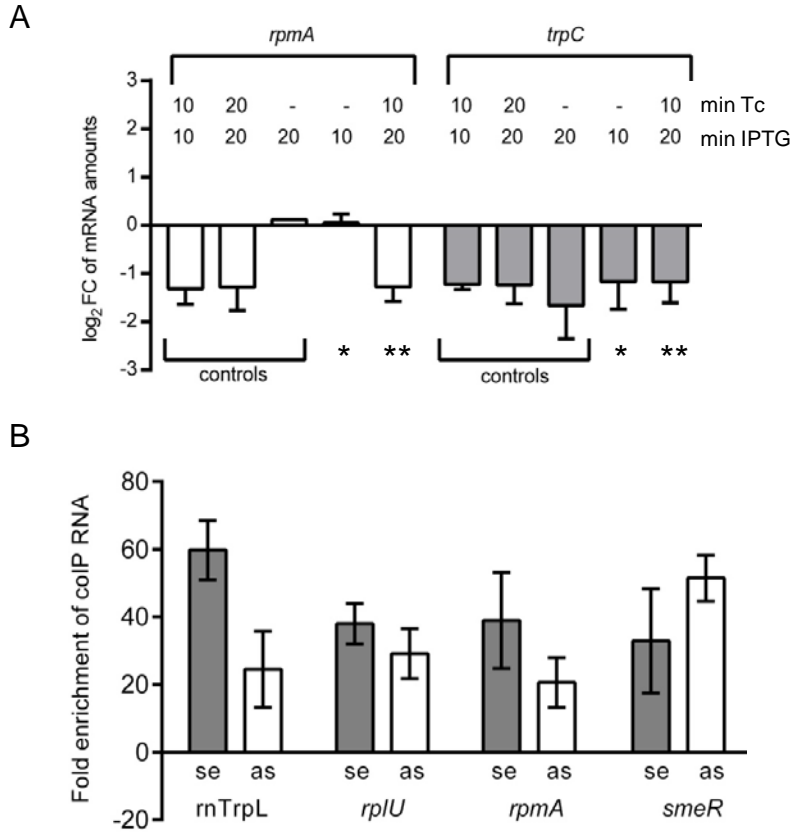

**Figure S3. Effect of Tc on *rpmA* downregulation by *rnrTrpL* and CoIP of antisense RNAs with 3xFLAG-peTrpL.** **A)** Tetracycline is not necessary for downregulation of *trpC* upon *rnrTrpL* induction, but is crucial for the downregulation of *rpmA*. qRT-PCR analysis of the indicated mRNAs in strain 2011 $\Delta$ *trpL* (pSRKGM-*rnrTrpL*, pRK4352). For detailed information, see Fig. 1F and 1G in the main text. **B)** Enrichment of sense (se) and antisense (as) RNAs in the 3xFLAG-peTrpL CoIP samples, which were obtained upon washing with Tc in the buffer (see Fig. 3B). The enrichment was calculated in comparison to the control, mock CoIP conducted with the peTrpL-containing lysate. Strand-specific qRT-PCR analysis of the indicated RNAs was performed. Shown are the results from three independent experiments, each performed in duplicates (means with standard deviations are indicated).

# Figure S4

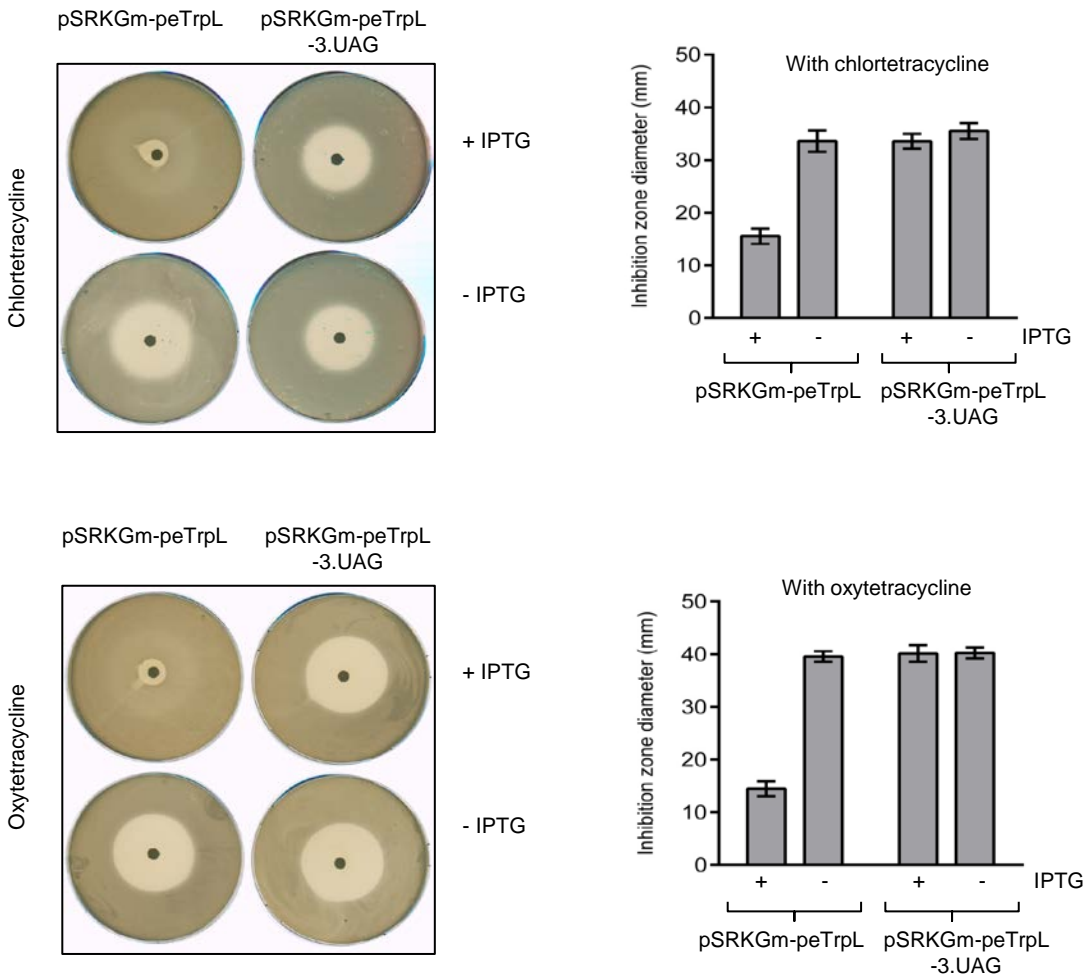

**Figure S4. Increased resistance to natural tetracyclines upon induced peTrpL overproduction in strain *S. meliloti* 2011ΔtrpL.** Representative plates with zones of growth inhibition caused by the centrally applied tetracycline antibiotics. Used antibiotics, plasmids and presence of IPTG in the growth media are indicated. On the right side, graphic representations of the results are shown. Data from three independent experiments were evaluated. Shown are means and error bars depicting the standard deviations.

# Figure S5

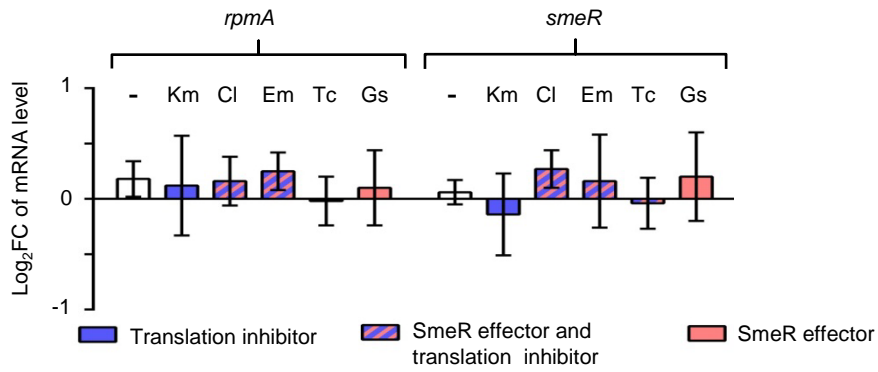

**Figure S5. Analysis of the effect of antimicrobial substances in strain 2011 $\Delta$ *trpL*.** The indicated antimicrobial substances were added to the cultures at subinhibitory concentrations (for details, see Fig. 6). Before and 10 min after addition of an antimicrobial substance, RNA was isolated and changes in the mRNA levels were determined by qRT-PCR. *trpE* mRNA was analyzed as a negative control. The antibiotics Km, Cl, Em and Tc are inhibitors of translation; Cl, Em, Tc and the plant flavonoid genistein (Gs) are effectors of SmeR, a repressor of the multidrug efflux pump SmeAB. The flavonoid Gs is an SmeR effector, but does not affect translation (indicated by colors). The results show that in the deletion mutant *S. meliloti* 2011 $\Delta$ *trpL*, the levels of *rpmA* and *smeR* mRNAs are not changed upon exposure to antimicrobial substances. Data from three independent experiments were evaluated. Shown are means and error bars depicting the standard deviations.

# Figure S6

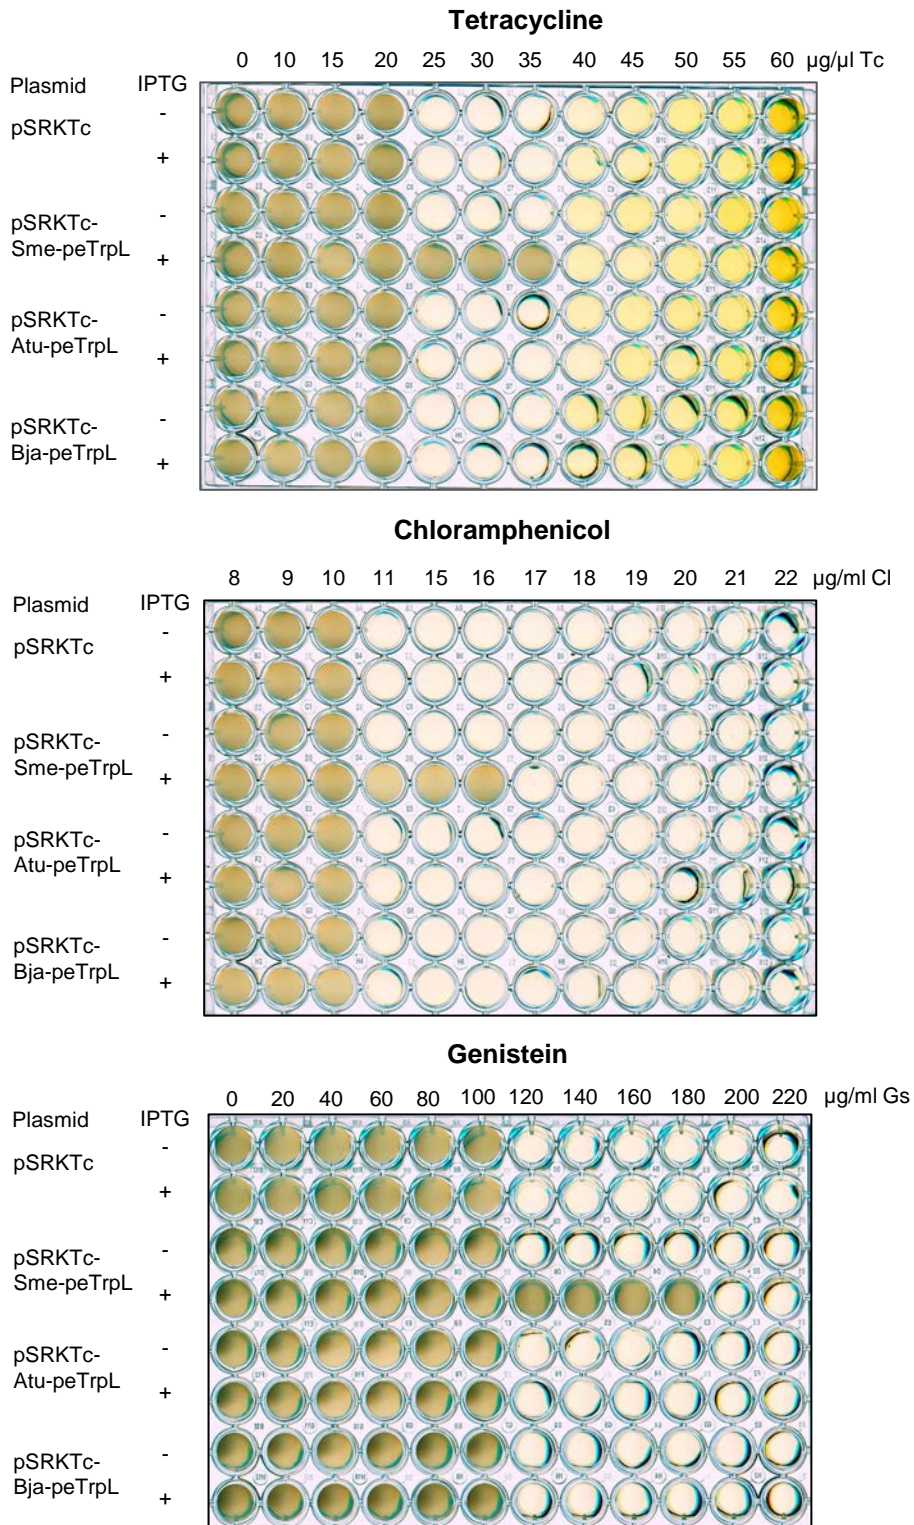

**Figure S6. Growth of *S. meliloti* 2011 $\Delta$ *trpL* containing the indicated plasmids, in media containing Tc, Cl or Gs at the indicated concentrations.** Cultures were diluted to an  $\text{OD}_{600}$  of 0.1 and grown for 60 h in 96-well plates. Presence of IPTG in the medium is indicated. Shown is one representative result of two independent experiments.

Figure S7

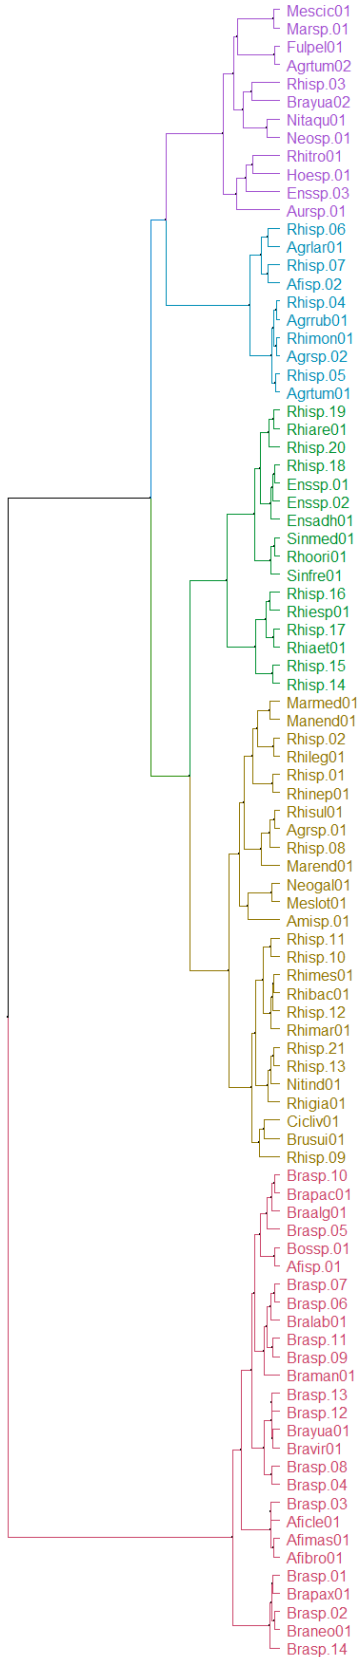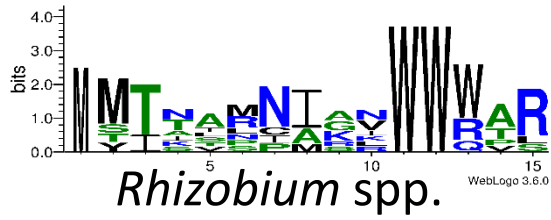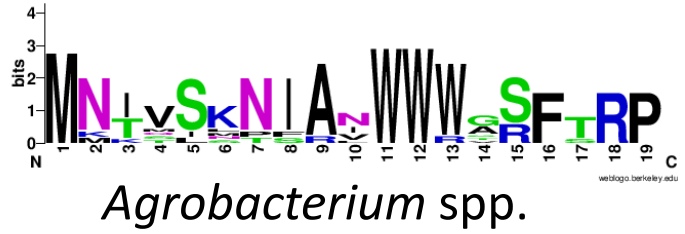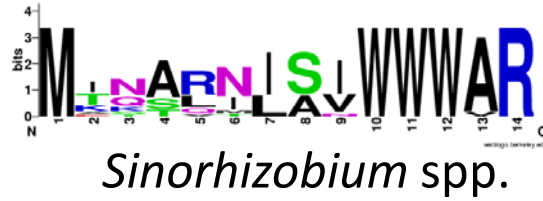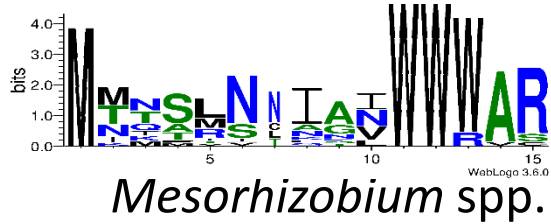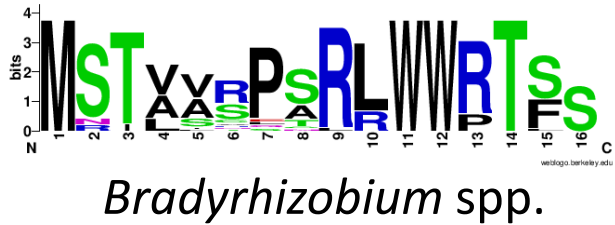

80 60 40 20 0



**Figure S7. Analysis of putative peTrpL peptides from other Rhizobiales members revealed several groups of conserved leader peptides, generally consistent with taxonomy.** For the complete list of species forming the groups shown by colors, see Table S1. Two major groups can be seen, one with two tryptophans and a consensus MSTvvrPsRLWWRTss present in *Bradyrhizobium* and related species (the red, bottom branch of the tree), and a larger group of four variants with slightly varying length and considerably varying sequence; clustering in this group is not very robust. The latter usually have three tryptophans within a loosely conserved context ni(a/s)(n/i/v)WWWAR. The comparison of the logos with the functional data in Fig. 7 yields a paradoxical observation that, despite functional conservation in *Sinorhizobium*, *Agrobacterium* and *Bradyrhizobium*, aside of the second tryptophan, the patterns of evolutionary and sequence conservation are markedly different.

| REAGENT or RESOURCE                                                                                                                                                        | SOURCE                          | IDENTIFIER                            |
|----------------------------------------------------------------------------------------------------------------------------------------------------------------------------|---------------------------------|---------------------------------------|
| <b>Bacterial Strains</b>                                                                                                                                                   |                                 |                                       |
| <i>Sinorhizobium meliloti</i> 2011                                                                                                                                         | Casse et al., 1979              | N/A                                   |
| <i>Sinorhizobium meliloti</i> 2011 $\Delta trpL$                                                                                                                           | Melior et al., 2019             | N/A                                   |
| <i>Sinorhizobium meliloti</i> 2011 $\Delta trpC$                                                                                                                           | Melior et al., 2019             | N/A                                   |
| <i>Agrobacterium tumefaciens</i> C58                                                                                                                                       | Baumgardt et al., 2016          | N/A                                   |
| <i>Bradyrhizobium japonicum</i> USDA 110spc4                                                                                                                               | Regensburger and Hennecke, 1983 | N/A                                   |
| <i>Escherichia coli</i> DH5 $\alpha$                                                                                                                                       | Thermo Fisher                   |                                       |
| <i>Escherichia coli</i> S17-1                                                                                                                                              | Simon et al., 1983              | N/A                                   |
| <b>Chemicals</b>                                                                                                                                                           |                                 |                                       |
| Carbonyl-cyanide 3-chlorophenylhydrazone (CCCP)                                                                                                                            | Sigma Aldrich                   | Cat#C2759-100MG                       |
| Chloramphenicol                                                                                                                                                            | Sigma Aldrich                   | Cat#C-0378                            |
| Chlortetracycline hydrochloride                                                                                                                                            | Sigma Aldrich                   | Cat#BCBM7261                          |
| Erythromycin                                                                                                                                                               | Sigma Aldrich                   | Cat#LRAA8967                          |
| Genistein                                                                                                                                                                  | Sigma Aldrich                   | Cat#G6649-5MG                         |
| Kanamycin sulfate                                                                                                                                                          | Roth                            | Cat#T832.3                            |
| Luteolin                                                                                                                                                                   | Sigma Aldrich                   | Cat#L9283-10MG                        |
| NileRed                                                                                                                                                                    | Sigma Aldrich                   | Cat#063KJ730V                         |
| Oxytetracycline hydrochloride                                                                                                                                              | Sigma Aldrich                   | Cat#107M4049                          |
| Streptomycine sulfate salt                                                                                                                                                 | Sigma Aldrich                   | Cat#SLBP6412                          |
| L-Tryptophane                                                                                                                                                              | Sigma Aldrich                   | Cat#BCBM5741V                         |
| Tetracycline Hydrochloride                                                                                                                                                 | Roth                            | Cat#HP63.2                            |
| FastDigest Restriction Endonucleases                                                                                                                                       | Thermo Fisher                   | N/A                                   |
| Denhardts Solution                                                                                                                                                         | Selfmade                        | Sambrook et al., 1989                 |
| [ <sup>32</sup> P] $\gamma$ ATP                                                                                                                                            | Hartmann Analytic               | Cat#SRP-301                           |
| <b>Critical Commercial Assays</b>                                                                                                                                          |                                 |                                       |
| Anti FLAG <sup>®</sup> M2 Magnetic Beads                                                                                                                                   | Sigma Aldrich                   | Cat#SLBT7133                          |
| RNAprotect Bacteria Reagent                                                                                                                                                | Qiagen                          | Cat# 76506                            |
| Brilliant III Ultra Fast SYBR <sup>®</sup> Green QRT-PCR Mastermix                                                                                                         | Agilent                         | Cat#600886                            |
| CloneJet PCR Cloning Kit                                                                                                                                                   | Thermo Fisher                   | Cat#K1232                             |
| E.Z.N.A. DNA Probe Purification Kit                                                                                                                                        | Omega                           | Cat#D6538-02                          |
| GeneJET Gel Extraction Kit                                                                                                                                                 | Thermo Fisher                   | Cat#K0692                             |
| Phusion Polymerase                                                                                                                                                         | Thermo Fisher                   | Cat#F530L                             |
| Power SYBR <sup>®</sup> PCR Mastermix                                                                                                                                      | Thermo Fisher                   | Cat#1705150                           |
| Pure Link <sup>™</sup> RNase A                                                                                                                                             | Thermo Fisher                   | Cat#12091021                          |
| Qiagen OneStep RT-PCR Kit                                                                                                                                                  | Qiagen                          | Cat#210212                            |
| RiboLock RNase inhibitor                                                                                                                                                   | Thermo Fisher                   | Cat#EO0381                            |
| RNeasy                                                                                                                                                                     | Qiagen                          | Cat#74104                             |
| RNase-Free MicroSpin G-25 columns (GE Healthcare)                                                                                                                          | Sigma-Aldrich                   | Cat# GE27-5325-01                     |
| SIGMAFAST <sup>™</sup> Protease Inhibitor Tablets                                                                                                                          | Sigma Aldrich                   | Cat#S8820-20TAB                       |
| SYBRGreen                                                                                                                                                                  | Thermo Fisher                   | Cat#S7564                             |
| T4 DNA Ligase                                                                                                                                                              | NEB                             | Cat#M0202S                            |
| Turbo DNAfree <sup>™</sup> Kit                                                                                                                                             | Thermo Fisher                   | Cat#AM1907                            |
| TRIzol                                                                                                                                                                     | Ambion                          | Cat#14380401                          |
| <b>Deposited Data</b>                                                                                                                                                      |                                 |                                       |
| Sequence Data; Genome-wide analysis of transcriptome of <i>S. meliloti</i> 2011 and 2011(pRK4352) strains by RNA-seq., and Analysis of coimmunoprecipitated RNA by RNA-seq | This work                       | GEO Series accession number GSE118689 |

| <b>Recombinant DNA</b>                                    |                        |               |
|-----------------------------------------------------------|------------------------|---------------|
| pJet- rplUrpmA'-egfp                                      | This work              | N/A           |
| pJet-rplU-CC222GG-rpmA'-egfp                              | This work              | N/A           |
| pJet-rplU-G228C-rpmA'-egfp                                | This work              | N/A           |
| pJet-PasRegfp                                             | This work              | N/A           |
| pRK4352                                                   | Mank et al., 2012      | N/A           |
| pRK-rnTrpL (synonym pRK-RcsR1)                            | Baumgardt et al., 2016 | N/A           |
| pRK-rnTrpL-AU1,2UA                                        | Melior et al., 2019    | N/A           |
| pRK-rnTrpL-CG40,41GC                                      | Melior et al., 2019    | N/A           |
| pRK-rnTrpL-G44C (synonym pRK-RcsR1-G44C)                  | Baumgardt et al., 2016 | N/A           |
| pRK-rnTrpL-GG46,47CC                                      | Melior et al., 2019    | N/A           |
| pSRKTc                                                    | Khan et al., 2008      | N/A           |
| pSRKGm                                                    | Khan et al., 2008      | N/A           |
| pSRKTc-rnTrpL                                             | Melior et al., 2019    | N/A           |
| pSRKTc-rnTrpL-CG40,41GC                                   | Melior et al., 2019    | N/A           |
| pSRKTc-rnTrpL-GG46,47CC                                   | Melior et al., 2019    | N/A           |
| pSRKGm-rnTrpL                                             | Melior et al., 2019    | N/A           |
| pSRKGm-peTrpL                                             | This work              | N/A           |
| pSRKGm-peTrpL-3.UAG                                       | This work              | N/A           |
| pSRKGm-peTrpL-N3A                                         | This work              | N/A           |
| pSRKGm-peTrpL-T4A                                         | This work              | N/A           |
| pSRKGm-peTrpL-Q5A                                         | This work              | N/A           |
| pSRKGm-peTrpL-N6A                                         | This work              | N/A           |
| pSRKGm-peTrpL-I7A                                         | This work              | N/A           |
| pSRKGm-peTrpL-S8A                                         | This work              | N/A           |
| pSRKGm-peTrpL-I9A                                         | This work              | N/A           |
| pSRKGm-peTrpL-W10A                                        | This work              | N/A           |
| pSRKGm-peTrpL-W11A                                        | This work              | N/A           |
| pSRKGm-peTrpL-W12A                                        | This work              | N/A           |
| pSRKGm-peTrpL-R14A                                        | This work              | N/A           |
| pSRKGm-3xFLAG-peTrpL                                      | This work              | N/A           |
| pSRKGm-rplUrpmA'-egfp                                     | This work              | N/A           |
| pSRKGm-rplU-CC222GG-rpmA'-egfp                            | This work              | N/A           |
| pSRKGm-rplU-G228C-rpmA'-egfp                              | This work              | N/A           |
| pSUP202pol4                                               | Fischer et al., 1993   | N/A           |
| pSUP-PasRegfp                                             | This work              | N/A           |
| pRJ-MCS                                                   | Hahn et al., 2016      | N/A           |
| pRJ-Bja-peTrpL                                            | This work              | N/A           |
| pRJ-Bja-rnTrpL                                            | Melior et al., 2019    | N/A           |
| pSRKGm-Atu-peTrpL                                         | This work              | N/A           |
| pSRKTc-Atu-rnTrpL                                         | Melior et al., 2019    | N/A           |
| pK18mobsacB                                               | Schäfer et al., 1994   | N/A           |
| pLK46                                                     | McIntosh et al., 2008  | N/A           |
| <b>Software and Algorithms</b>                            |                        |               |
| Biorad CFX Manager                                        | Biorad                 | Version 3.0   |
| Graph Pad Prism 6                                         | Graph Pad              | Version 6.07  |
| Quantity One Basic                                        | Biorad                 | Version 4.6.9 |
| Tecan Icontrol                                            | Tecan                  | Version 1.6   |
| <b>Other</b>                                              |                        |               |
| Biorad C1000 Thermal Cycler CFX96 Real Time System        | Biorad                 | N/A           |
| Biorad Personal Molecular Imager FX                       | Biorad                 | N/A           |
| Rothi <sup>®</sup> -Nylon_Plus (+ Charged Nylon Membrane) | Roth                   | Cat#K058.1    |
| Glass beads                                               | Roth                   | Cat#A553.1    |

|                              |                    |             |
|------------------------------|--------------------|-------------|
| Nunc Nunclon 96 Well Plate   | Thermo Scientific™ | Cat#AM10104 |
| Semi-Dry Electro Blotter     | Peqlab             | Cat#028406  |
| Retsch MM200 (Shacking Mill) | Retsch             | N/A         |
| Tecan infinity M200          | Tecan              | Cat# 168136 |

**Table S2, Reagents and resources used in this work.** N/A, not applicable
